# Supplementary material for: Identification of trypsin-degrading commensals in the large intestine
Source: Nature. 2022 Sep 7;609(7927):582–9. doi: 10.1038/s41586-022-05181-3 (PMC9477747; doi:10.1038/s41586-022-05181-3)
Supplement: Supplementary file 4 — Peptidomic analysis of GF mouse caecal contents incubated with P. clara 1C4 or medium control. [file 41586_2022_5181_MOESM4_ESM.xlsx]

## Sheet: Peptide list
Supplementary Table 2 Peptidomic analysis of GF mouse cecal contents incubated with P.clara (1C4) or medium control
Uniprot Ac.	Protein name	Gene name	Peptide	Start	End	PTM	1C4_0 min	1C4_30 min	1C4_60 min	1C4_90 min	1C4_120 min	1C4_180 min	1C4_240 min	Control_0 min	Control_30 min	Control_60 min	Control_90 min	Control_120 min	Control_180 min	Control_240 min
P58774	Tropomyosin beta chain	Tpm2	V.EEELDRA.Q	96	102		1520000000	1850000000	2500000000	2720000000	2910000000	3220000000	3420000000	1970000000	3100000000	4080000000	4250000000	1850000000	3920000000	208000000
P58774	Tropomyosin beta chain	Tpm2	A.TALQKLEEAEKA.A	108	119		332000000	485000000	401000000	437000000	479000000	495000000	456000000	418000000	399000000	279000000	286000000	239000000	202000000	124000000
P58774	Tropomyosin beta chain	Tpm2	A.TALQKLEEAEKAA.D	108	120		150000000	225000000	162000000	160000000	169000000	170000000	160000000	192000000	173000000	4440000	80300000	55400000	27900000	15300000
P58774	Tropomyosin beta chain	Tpm2	K.LVILEGELER.S	169	178		98100000	133000000	176000000	146000000	170000000	130000000	102000000	67800000	90900000	145000000	147000000	114000000	101000000	57700000
P58774	Tropomyosin beta chain	Tpm2	R.LATALQKLEEAEKA.A	106	119		569000000	456000000	362000000	185000000	197000000	160000000	97400000	317000000	74900000	11700000	6060000	5110000	2640000	9830000
P58774	Tropomyosin beta chain	Tpm2	R.IQLVEEELDRA.Q	92	102		218000000	200000000	207000000	95300000	31500000	6770000	613000	335000000	117000000	72300000	27400000	11000000	0	7520000
P58774	Tropomyosin beta chain	Tpm2	V.EEELDRAQER.L	96	105		840000000	1860000000	2550000000	1240000000	988000000	726000000	664000000	1370000000	964000000	1170000000	843000000	868000000	616000000	494000000
P58774	Tropomyosin beta chain	Tpm2	I.LEGELERS.E	172	179		32300000	55500000	42300000	73100000	119000000	163000000	18500000	43900000	106000000	49100000	147000000	167000000	167000000	158000000
P58774	Tropomyosin beta chain	Tpm2	I.AEDSDRKYEEVAR.K	155	167		842000000	702000000	568000000	562000000	515000000	284000000	239000000	785000000	485000000	437000000	183000000	136000000	12500000	42600000
P58774	Tropomyosin beta chain	Tpm2	V.EEELDRAQERLA.T	96	107		524000000	586000000	433000000	323000000	281000000	212000000	139000000	302000000	93800000	26700000	5030000	8010000	0	1430000
P58774	Tropomyosin beta chain	Tpm2	A.ETRAEFAER.S	236	244		267000000	263000000	209000000	155000000	130000000	124000000	87900000	171000000	66300000	0	0	0	0	0
P58774	Tropomyosin beta chain	Tpm2	I.KLLEEKLKEAET.R	226	237		481000000	105000000	61300000	80100000	72300000	54100000	34100000	83100000	55100000	18600000	4210000	0	0	0
P58774	Tropomyosin beta chain	Tpm2	A.TALQKLEEAEK.A	108	118		70900000	137000000	146000000	172000000	196000000	184000000	209000000	71900000	112000000	133000000	162000000	153000000	150000000	110000000
P58774	Tropomyosin beta chain	Tpm2	K.MELQEMQLK.E	141	149		33200000	59300000	78500000	0	76000000	63000000	56000000	27800000	46100000	75700000	85300000	83300000	77200000	45800000
P58774	Tropomyosin beta chain	Tpm2	R.AMKDEEKMELQEMQLK.E	134	149		222000000	122000000	169000000	242000000	175000000	132000000	64900000	82000000	123000000	105000000	175000000	128000000	30600000	19900000
P58774	Tropomyosin beta chain	Tpm2	I.KLLEEKLK.E	226	233		28200000	67800000	74500000	78300000	94800000	90600000	92000000	45300000	70000000	50700000	29900000	18500000	6150000	3680000
P58774	Tropomyosin beta chain	Tpm2	K.LVILEGELERSEERA.E	169	183		64300000	101000000	94100000	114000000	108000000	84000000	51500000	52800000	78900000	53700000	41300000	17900000	7830000	3480000
P58774	Tropomyosin beta chain	Tpm2	M.DAIKKK.M	2	7		670000000	354000000	276000000	189000000	365000000	263000000	231000000	265000000	243000000	211000000	153000000	135000000	103000000	72900000
P58774	Tropomyosin beta chain	Tpm2	I.LEGELERSEERAEVA.E	172	186		120000000	142000000	42100000	102000000	88200000	67500000	34700000	138000000	121000000	83200000	53400000	37600000	8630000	3890000
P58774	Tropomyosin beta chain	Tpm2	V.ILEGELER.S	171	178		18300000	29200000	43600000	52200000	59600000	1460000	86400000	19500000	42700000	59300000	74400000	84300000	91500000	109000000
P58774	Tropomyosin beta chain	Tpm2	A.LQKLEEAEK.A	110	118		373000000	521000000	646000000	419000000	687000000	877000000	761000000	273000000	645000000	820000000	972000000	96500000	154000000	0
P58774	Tropomyosin beta chain	Tpm2	R.KLVILEGELERSEERA.E	168	183		61900000	88900000	85000000	78600000	68900000	48100000	23300000	60700000	46300000	33500000	12700000	3690000	0	1120000
P58774	Tropomyosin beta chain	Tpm2	R.AMKDEEKMELQEMQLKEAK.H	134	152		431000000	312000000	264000000	212000000	163000000	103000000	87600000	290000000	129000000	69000000	31400000	14400000	2570000	5700000
P58774	Tropomyosin beta chain	Tpm2	V.KDAQEKLEQAEKK.A	65	77		984000	18200000	22300000	34800000	7620000	52500000	71400000	18600000	58500000	31900000	106000000	154000000	88600000	77900000
P58774	Tropomyosin beta chain	Tpm2	K.KLKGTEDEVEKY.S	49	60		30500000	37100000	21700000	373000000	47200000	17400000	32700000	13300000	16300000	0	0	0	0	0
P58774	Tropomyosin beta chain	Tpm2	I.LEGELERSEERA.E	172	183		17100000	37800000	31600000	42100000	49400000	62100000	52400000	29000000	53600000	43100000	41000000	29900000	23300000	12500000
P58774	Tropomyosin beta chain	Tpm2	K.LEEAEKAADESER.G	113	125		74900000	152000000	69200000	83200000	63000000	42100000	68500000	101000000	104000000	174000000	205000000	208000000	171000000	252000000
P58774	Tropomyosin beta chain	Tpm2	I.KLLEEKLKEA.E	226	235		32800000	83800000	19300000	98700000	133000000	106000000	113000000	42000000	48500000	21500000	2360000	3190000	0	0
P58774	Tropomyosin beta chain	Tpm2	R.AEQAEADKKQAEDRC(+57.02)KQLEEEQQALQKK.L	22	49	Carbamidomethylation	53800000	46100000	46600000	46900000	44700000	43700000	42300000	40300000	30200000	24200000	16000000	11600000	5620000	0
P58774	Tropomyosin beta chain	Tpm2	K.HIAEDSDRKYEEV.A	153	165		40700000	65000000	67600000	92100000	80700000	88400000	87700000	37100000	50500000	60700000	48600000	46400000	40700000	24900000
P58774	Tropomyosin beta chain	Tpm2	R.C(+57.02)KQLEEEQQA.L	36	45	Carbamidomethylation	0	9750000	18800000	24000000	39100000	27600000	51200000	17500000	32800000	39100000	54600000	60400000	46600000	75600000
P58774	Tropomyosin beta chain	Tpm2	C.KQLEEEQQALQK.K	37	48		9840000	17400000	21900000	0	34300000	42500000	59100000	0	0	41600000	56400000	70400000	0	132000000
P58774	Tropomyosin beta chain	Tpm2	I.AEDSDRKYEEVARK.L	155	168		615000000	528000000	202000000	76100000	157000000	47600000	1630000	211000000	48900000	43100000	14800000	0	0	0
P58774	Tropomyosin beta chain	Tpm2	R.LATALQK.L	106	112		608000000	925000000	1140000000	951000000	830000000	797000000	682000000	1100000000	1110000000	1510000000	888000000	700000000	432000000	264000000
P58774	Tropomyosin beta chain	Tpm2	K.C(+57.02)GDLEEELKIV.T	190	200	Carbamidomethylation	22900000	14200000	16600000	15100000	14500000	24500000	22600000	20000000	42400000	54000000	66200000	82000000	92300000	80700000
P58774	Tropomyosin beta chain	Tpm2	V.KDAQEKLEQAEKKA.T	65	78		31800000	48800000	52100000	97000000	154000000	210000000	244000000	36000000	79000000	59200000	66800000	63800000	24000000	5300000
P58774	Tropomyosin beta chain	Tpm2	V.ILEGELERS.E	171	179		9680000	13000000	13400000	25500000	29900000	43700000	56700000	21300000	26300000	19200000	33700000	29400000	39700000	40000000
P58774	Tropomyosin beta chain	Tpm2	E.EEIKLLEEKLK.E	223	233		0	2380000	6770000	6480000	3730000	3450000	0	2750000	6670000	6540000	5290000	349000000	1480000	0
P58774	Tropomyosin beta chain	Tpm2	L.VEEELDRA.Q	95	102		17800000	25700000	26000000	20500000	22000000	30100000	33700000	17100000	23200000	21300000	24100000	32300000	22200000	20200000
P58774	Tropomyosin beta chain	Tpm2	A.EDSDRKYEEVA.R	156	166		7370000	13000000	12900000	21600000	30700000	31800000	31400000	21100000	28200000	25000000	34900000	33900000	26600000	19600000
P58774	Tropomyosin beta chain	Tpm2	K.DEEKMELQEMQLK.E	137	149		18600000	33400000	48900000	50500000	32400000	64000000	49700000	35900000	52500000	81800000	76400000	65100000	42400000	10700000
P58774	Tropomyosin beta chain	Tpm2	R.KLVILEGELERSEERAEVA.E	168	186		240000000	196000000	178000000	76500000	53200000	23500000	6400000	192000000	83500000	42600000	7790000	0	0	0
P58774	Tropomyosin beta chain	Tpm2	A.EKKATDAEADVA.S	75	86		86300000	154000000	0	8410000	59200000	66000000	10600000	0	0	0	0	0	0	0
P58774	Tropomyosin beta chain	Tpm2	R.AMKDEEKMELQEMQLKEA.K	134	151		94700000	72700000	40300000	34000000	15900000	13600000	5300000	121000000	59400000	27400000	17200000	5540000	0	0
P58774	Tropomyosin beta chain	Tpm2	K.LEEAEKAADESERGMK.V	113	128		78800000	94800000	115000000	69500000	34000000	39200000	37400000	129000000	56800000	32800000	29800000	19400000	13300000	16500000
P58774	Tropomyosin beta chain	Tpm2	K.GTEDEVEKYSESVKDAQEKLEQAEKKA.T	52	78		253000000	387000000	398000000	558000000	683000000	778000000	712000000	583000000	743000000	637000000	565000000	305000000	165000000	54900000
P58774	Tropomyosin beta chain	Tpm2	R.AM(+15.99)KDEEKMELQEMQLK.E	134	149	Oxidation (M)	53400000	72700000	78100000	68200000	49100000	24400000	15800000	70000000	76200000	75000000	61500000	21600000	19600000	1420000
P58774	Tropomyosin beta chain	Tpm2	L.EEKLKEAETRAEFAER.S	229	244		95000000	54600000	20900000	15900000	4000000	0	0	48000000	8320000	0	0	0	0	0
P58774	Tropomyosin beta chain	Tpm2	L.QKLEEAEK.A	111	118		18800000	15600000	13500000	0	19000000	20200000	19700000	977000	24500000	92000000	49900000	0	0	0
P58774	Tropomyosin beta chain	Tpm2	I.KLLEEKLKEAETR.A	226	238		42400000	70400000	63400000	44700000	38300000	25200000	15500000	52300000	20700000	1840000	0	0	0	0
P58774	Tropomyosin beta chain	Tpm2	K.KATDAEADVA.S	77	86		232000000	423000000	465000000	276000000	587000000	527000000	527000000	228000000	268000000	553000000	478000000	377000000	411000000	562000000
P58774	Tropomyosin beta chain	Tpm2	K.LKGTEDEVEKYSESVKDAQEKLEQAEK.K	50	76		41300000	75700000	96000000	95000000	108000000	115000000	99000000	40600000	76500000	150000000	84300000	131000000	120000000	45000000
P58774	Tropomyosin beta chain	Tpm2	G.DLEEELKIV.T	192	200		6230000	9860000	10900000	15200000	23100000	19600000	21900000	14600000	15900000	19700000	21800000	24000000	27200000	26000000
P58774	Tropomyosin beta chain	Tpm2	L.LEEKLKE.A	228	234		0	0	23800000	23100000	31500000	0	0	61600000	31900000	0	0	0	0	0
P58774	Tropomyosin beta chain	Tpm2	M.ELQEMQLK.E	142	149		0	11100000	12600000	16300000	21300000	31000000	31300000	6550000	9610000	15500000	22600000	21900000	23800000	20600000
P58774	Tropomyosin beta chain	Tpm2	V.ILEGELERSEERAEVA.E	171	186		29800000	39300000	29400000	29600000	27100000	20200000	7890000	38000000	35200000	29800000	16300000	6200000	0	0
P58774	Tropomyosin beta chain	Tpm2	R.AM(+15.99)KDEEKMEL.Q	134	143	Oxidation (M)	13800000	15700000	12900000	13800000	11900000	12400000	12500000	27200000	12000000	14500000	14500000	15200000	11900000	17900000
P58774	Tropomyosin beta chain	Tpm2	K.LEEAEKAADESERGMKVI.E	113	130		136000000	83000000	77000000	41400000	10000000	8910000	12400000	52700000	5120000	0	0	0	0	0
P58774	Tropomyosin beta chain	Tpm2	K.GTEDEVEKYSESVKDAQEKLEQAEKKATDAEADVA.S	52	86		852000000	826000000	699000000	505000000	275000000	136000000	46700000	1060000000	591000000	333000000	167000000	35800000	5150000	0
P58774	Tropomyosin beta chain	Tpm2	K.GTEDEVEKYSESV.K	52	64		38200000	75900000	73900000	106000000	137000000	171000000	200000000	78000000	135000000	158000000	222000000	274000000	320000000	339000000
P58774	Tropomyosin beta chain	Tpm2	E.DEVEKYSESV.K	55	64		0	5030000	5940000	10800000	13700000	14700000	25200000	2530000	6440000	10200000	16600000	24600000	33300000	45900000
P58774	Tropomyosin beta chain	Tpm2	L.VILEGELER.S	170	178		0	14300000	0	0	0	61100000	39500000	0	0	8450000	18800000	19600000	24000000	16300000
P58774	Tropomyosin beta chain	Tpm2	K.AISEELDNA.L	269	277		6540000	7750000	13000000	12000000	15900000	14200000	16900000	7960000	6650000	12500000	16000000	19500000	21000000	20200000
P58774	Tropomyosin beta chain	Tpm2	A.LQKLEE.A	110	115		0	0	8620000	1970000	9480000	5580000	5170000	12400000	19400000	16300000	13800000	16300000	14700000	50100000
P58774	Tropomyosin beta chain	Tpm2	K.DEEKMELQEM.Q	137	146		0	1900000	3040000	9480000	10700000	16400000	20900000	1930000	5660000	10800000	18100000	27500000	33400000	32700000
P58774	Tropomyosin beta chain	Tpm2	N.RAMKDEEKMELQEMQLK.E	133	149		37800000	23400000	23800000	17100000	16800000	11700000	6900000	36800000	20900000	19900000	20400000	9510000	10300000	11700000
P58774	Tropomyosin beta chain	Tpm2	K.SLEAQADKYSTKEDKYEEEIKLLEEKLKEA.E	206	235		81500000	124000000	78900000	20900000	7200000	0	0	80700000	17100000	0	0	0	0	0
P58774	Tropomyosin beta chain	Tpm2	K.QLEEEQQALQK.K	38	48		21400000	36700000	35000000	31400000	56500000	20800000	39700000	42600000	45600000	46600000	41400000	51100000	9110000	11100000
P58774	Tropomyosin beta chain	Tpm2	K.LVILEGELERSEER.A	169	182		20800000	25700000	31000000	26000000	3480000	8250000	4660000	19100000	20000000	24000000	11700000	12400000	0	0
P58774	Tropomyosin beta chain	Tpm2	I.DDLEDEVYAQKMK.Y	254	266		437000000	452000000	413000000	432000000	379000000	404000000	369000000	431000000	255000000	198000000	146000000	93700000	83200000	45700000
P58774	Tropomyosin beta chain	Tpm2	K.EDKYEEEIKLLEEKLKEA.E	218	235		14600000	26900000	28600000	18000000	5730000	0	0	20100000	17800000	9220000	1850000	0	0	0
P58774	Tropomyosin beta chain	Tpm2	D.LEDEVYAQKMK.Y	256	266		58900000	47200000	46900000	46000000	41200000	37800000	33800000	36200000	24600000	17100000	26100000	29000000	13800000	13600000
P58774	Tropomyosin beta chain	Tpm2	I.LEGELERSEER.A	172	182		5630000	14300000	10400000	11300000	11700000	8500000	10500000	7360000	13200000	14600000	17900000	6070000	2680000	0
P58774	Tropomyosin beta chain	Tpm2	Q.LEEEQQALQKK.L	39	49		58000000	21000000	21300000	31100000	64800000	32600000	89700000	17100000	45300000	50000000	59700000	64400000	78200000	91200000
P58774	Tropomyosin beta chain	Tpm2	K.LKGTEDEVEKYSESVKDAQEKLEQAEKK.A	50	77		0	22900000	24000000	26400000	5240000	12400000	28300000	7870000	18900000	13300000	10500000	3040000	4850000	0
P58774	Tropomyosin beta chain	Tpm2	R.AMKDEEKMELQ.E	134	144		18600000	8470000	11900000	22500000	24400000	22200000	42400000	16800000	18700000	28400000	29700000	46300000	37500000	41800000
P58774	Tropomyosin beta chain	Tpm2	S.ESVKDAQEKLEQAEKKA.T	62	78		6900000	10200000	9650000	9560000	12600000	5770000	18800000	200000000	294000000	310000000	231000000	214000000	149000000	90100000
P58774	Tropomyosin beta chain	Tpm2	R.AM(+15.99)KDEEKMELQEMQLKEAK.H	134	152	Oxidation (M)	49400000	28000000	45000000	19200000	21600000	9380000	4240000	34300000	1880000	4830000	455000	0	0	0
P58774	Tropomyosin beta chain	Tpm2	K.LKGTEDEVEKYSESVKDAQEKLEQAEKKATDAEADVA.S	50	86		250000000	218000000	165000000	103000000	50300000	18900000	6150000	119000000	58700000	17100000	0	0	0	0
P58774	Tropomyosin beta chain	Tpm2	K.SLEAQADKY.S	206	214		3210000	2410000	2790000	7670000	8290000	12300000	18000000	2770000	5610000	6810000	8090000	13000000	21100000	21500000
P58774	Tropomyosin beta chain	Tpm2	R.AMKDEEKMELQEM.Q	134	146		23600000	53800000	63600000	92500000	123000000	129000000	148000000	49500000	96700000	116000000	148000000	169000000	163000000	129000000
P58774	Tropomyosin beta chain	Tpm2	K.HIAEDSDRKYEE.V	153	164		119000000	25300000	47300000	67300000	26400000	41000000	42100000	48000000	12600000	0	0	0	0	0
P58774	Tropomyosin beta chain	Tpm2	K.DAQEKLEQAEKKA.T	66	78		2030000	7440000	7140000	9010000	14800000	17600000	20000000	0	11500000	13600000	18200000	17000000	14900000	4340000
P58774	Tropomyosin beta chain	Tpm2	S.EERAEVAESKC(+57.02)GDLEEELKIV.T	180	200	Carbamidomethylation	22400000	30100000	22100000	17600000	20000000	11700000	5180000	21400000	36600000	18900000	10800000	7930000	0	0
P58774	Tropomyosin beta chain	Tpm2	K.MELQEMQLKEAK.H	141	152		10400000	7690000	7380000	29600000	27500000	25600000	20000000	15300000	12700000	12100000	4330000	6710000	2190000	0
P58774	Tropomyosin beta chain	Tpm2	V.EEELDRAQE.R	96	104		0	3600000	5770000	6760000	9780000	9460000	9240000	8460000	4170000	7490000	5920000	9870000	19300000	24000000
P58774	Tropomyosin beta chain	Tpm2	D.DLEDEVYAQK.M	255	264		35100000	88200000	53700000	28400000	86000000	68600000	65800000	30800000	48800000	53800000	91000000	44400000	43900000	41200000
P58774	Tropomyosin beta chain	Tpm2	K.GTEDEVEKYSESVK.D	52	65		466000	1740000	3700000	1970000	13700000	16000000	15400000	8720000	21600000	53700000	55400000	61500000	61700000	77600000
P58774	Tropomyosin beta chain	Tpm2	K.LVILEGELERSEERAEV.A	169	185		24100000	17200000	17800000	10300000	8540000	4490000	1130000	10600000	3650000	3380000	1930000	0	0	0
P58774	Tropomyosin beta chain	Tpm2	R.AMKDEEKMELQEM(+15.99)QLK.E	134	149	Oxidation (M)	10300000	19400000	21400000	19800000	22600000	8980000	2410000	15300000	17200000	22100000	19000000	11400000	7760000	3020000
P58774	Tropomyosin beta chain	Tpm2	V.ILEGELERSEERA.E	171	183		7140000	1350000	1840000	4470000	0	2380000	19600000	10800000	13900000	11800000	23200000	16000000	7470000	6140000
P58774	Tropomyosin beta chain	Tpm2	K.LKGTEDEVEKYSESV.K	50	64		16800000	32900000	39800000	34400000	59300000	70000000	75400000	22700000	38300000	33700000	43700000	42100000	46500000	44400000
P58774	Tropomyosin beta chain	Tpm2	R.SEERAEVAESKC(+57.02)GDLEEELKIV.T	179	200		79000000	87700000	96100000	67200000	63500000	33800000	22400000	97200000	93400000	80100000	52500000	24200000	9070000	8900000
P58774	Tropomyosin beta chain	Tpm2	R.LATALQKLEEAEKAADESERGMKV.I	106	129		117000000	40600000	21000000	6870000	638000	0	0	14600000	0	0	0	0	0	0
P58774	Tropomyosin beta chain	Tpm2	K.QLEEEQQA.L	38	45		0	0	0	11600000	4420000	0	0	0	6400000	11000000	15900000	16400000	22800000	21500000
P58774	Tropomyosin beta chain	Tpm2	R.C(+57.02)KQLEEEQQALQKK.L	36	49		0	7430000	21900000	22300000	5410000	11400000	34200000	11700000	46400000	37700000	10100000	9620000	11600000	4020000
P58774	Tropomyosin beta chain	Tpm2	K.DAQEKLEQAEKKATDAEADVA.S	66	86		5770000	8860000	11300000	7560000	5950000	5610000	4090000	9400000	8720000	12700000	6390000	5520000	0	0
P58774	Tropomyosin beta chain	Tpm2	I.DDLEDEVYAQKM(+15.99)K.Y	254	266		30700000	40000000	26300000	43000000	28000000	25700000	26300000	27600000	19500000	9180000	8630000	4560000	3020000	1530000
P58774	Tropomyosin beta chain	Tpm2	I.LEGELERSEERAEV.A	172	185		17500000	19000000	7150000	13900000	14000000	7760000	4210000	17400000	14000000	11000000	4490000	0	0	0
P58774	Tropomyosin beta chain	Tpm2	L.VEEELDRAQERL.A	95	106		13700000	14800000	20000000	5300000	13900000	12700000	9070000	17500000	8990000	13500000	9680000	8970000	11100000	8080000
P58774	Tropomyosin beta chain	Tpm2	K.HIAEDSDRKYEEVA.R	153	166		10200000	9260000	5550000	42900000	11200000	12900000	11200000	10600000	6040000	1440000	10100000	0	5740000	0
P58774	Tropomyosin beta chain	Tpm2	K.DAQEKLEQAEK.K	66	76		0	4950000	7850000	14100000	14200000	14500000	25400000	4460000	19400000	35600000	59900000	86700000	99600000	145000000
P58774	Tropomyosin beta chain	Tpm2	K.GTEDEVEKYSESVKDAQEKLEQA.E	52	74		9550000	18800000	18400000	37200000	36600000	81700000	83300000	23800000	56200000	68700000	104000000	135000000	141000000	128000000
P58774	Tropomyosin beta chain	Tpm2	T.KEDKYEEEI.K	217	225		0	0	2980000	0	10800000	15700000	19300000	0	4170000	5770000	7590000	8720000	12800000	12200000
P58774	Tropomyosin beta chain	Tpm2	K.MQMLKLDK.E	8	15		10900000	11800000	0	7650000	12200000	6170000	8650000	0	0	11100000	5920000	11400000	0	0
P58774	Tropomyosin beta chain	Tpm2	E.EEIKLLEEKLKEA.E	223	235		2960000	8020000	12500000	14000000	8750000	17700000	15100000	3700000	6860000	5170000	3750000	1980000	1400000	991000
P58774	Tropomyosin beta chain	Tpm2	K.LKGTEDEVEKYSESVKDAQEKLEQA.E	50	74		0	1420000	0	6730000	17000000	22600000	21900000	0	11300000	14200000	17400000	17600000	18300000	8990000
P58774	Tropomyosin beta chain	Tpm2	A.TDAEADVASLNR.R	79	90		0	0	0	23900000	22100000	5880000	12500000	17900000	5210000	2120000	10200000	2820000	3350000	3350000
P58774	Tropomyosin beta chain	Tpm2	R.AEVAESKC(+57.02)GDLEEELKIV.T	183	200	Carbamidomethylation	30100000	44300000	58600000	51200000	54200000	46200000	36700000	35000000	51900000	67800000	61100000	54100000	39100000	22100000
P58774	Tropomyosin beta chain	Tpm2	K.TIDDLEDEVYAQKMK.Y	252	266		521000000	561000000	555000000	469000000	495000000	452000000	358000000	464000000	334000000	288000000	165000000	115000000	55100000	17900000
P58774	Tropomyosin beta chain	Tpm2	I.KLLEEKLKEAETRAEFAER.S	226	244		84000000	26800000	16100000	5560000	0	0	0	39400000	4490000	0	0	0	0	0
P58774	Tropomyosin beta chain	Tpm2	A.LQKLEEAEKA.A	110	119		4810000	7970000	6810000	6070000	0	8750000	7550000	7470000	6620000	4920000	3970000	4300000	3610000	2670000
P58774	Tropomyosin beta chain	Tpm2	K.YSESVKDAQEKLEQAEKKA.T	60	78		0	1270000	1930000	6260000	3660000	3970000	26800000	920000	10100000	20300000	19100000	16000000	33100000	36300000
P58774	Tropomyosin beta chain	Tpm2	A.KHIAEDSDRKYEEVAR.K	152	167		68400000	38200000	43700000	15300000	18000000	6130000	0	32500000	6380000	8090000	0	0	0	0
P58774	Tropomyosin beta chain	Tpm2	K.QLEEEQQALQKK.L	38	49		30800000	10500000	13100000	9680000	12800000	10600000	13000000	0	22900000	25500000	29600000	26500000	25900000	25100000
P58774	Tropomyosin beta chain	Tpm2	K.SLEAQADKYST.K	206	216		0	0	0	0	0	1070000	3310000	2840000	6070000	24500000	13100000	15700000	0	15400000
P58774	Tropomyosin beta chain	Tpm2	K.HIAEDSDRKYEEVAR.K	153	167		288000000	186000000	207000000	134000000	77200000	12500000	21500000	86800000	58400000	38800000	13500000	0	0	0
P58774	Tropomyosin beta chain	Tpm2	K.MELQEMQLKEA.K	141	151		16600000	10300000	0	9050000	0	0	0	10100000	11500000	6600000	4730000	1260000	0	0
P58774	Tropomyosin beta chain	Tpm2	K.MQMLKLDKEN.A	8	17		7040000	15100000	8110000	5790000	4310000	991000	0	79700000	71800000	33300000	7200000	20500000	21800000	23100000
P58774	Tropomyosin beta chain	Tpm2	K.SLEAQADKYSTKEDKYEEEI.K	206	225		124000000	295000000	296000000	441000000	478000000	428000000	392000000	147000000	470000000	439000000	470000000	339000000	278000000	130000000
P58774	Tropomyosin beta chain	Tpm2	L.VEEELDRAQER.L	95	105		1630000	73700000	6360000	79400000	50800000	46000000	11700000	251000000	46100000	12700000	12500000	31600000	57000000	43600000
P58774	Tropomyosin beta chain	Tpm2	L.EGELERSEE.R	173	181		15200000	7810000	0	7680000	15200000	0	0	8960000	0	0	0	0	0	0
P58774	Tropomyosin beta chain	Tpm2	K.EDKYEEEIKLLEEKLKEAET.R	218	237		19300000	822000	9140000	3020000	0	0	0	18700000	5390000	0	0	0	0	0
P58774	Tropomyosin beta chain	Tpm2	E.DEVEKYSESVKDAQEKLEQA.E	55	74		0	0	0	1580000	0	10800000	13600000	0	2760000	4350000	13900000	18500000	19100000	7450000
P58774	Tropomyosin beta chain	Tpm2	K.SLEAQADKYSTKEDKYEEEIKLLEEKLKEAET.R	206	237		77700000	46800000	25200000	2460000	0	0	0	61200000	4830000	0	0	0	0	0
P58774	Tropomyosin beta chain	Tpm2	A.LQKLEEAEKAA.D	110	120		7700000	14000000	13000000	5930000	10500000	12200000	10100000	12600000	11200000	5320000	8290000	10500000	33200000	9370000
P58774	Tropomyosin beta chain	Tpm2	C.KQLEEEQQALQKK.L	37	49		6530000	11300000	12900000	5170000	6580000	7300000	9630000	4230000	0	3580000	0	3920000	3300000	0
P58774	Tropomyosin beta chain	Tpm2	I.AEDSDRKYEEV.A	155	165		33800000	66200000	73800000	112000000	115000000	138000000	167000000	88700000	156000000	134000000	139000000	162000000	190000000	135000000
P58774	Tropomyosin beta chain	Tpm2	K.LKGTEDEVEKYSESVK.D	50	65		567000000	592000000	695000000	786000000	722000000	692000000	729000000	775000000	695000000	619000000	681000000	689000000	697000000	677000000
P58774	Tropomyosin beta chain	Tpm2	R.KLVILEGELERSEERAEVAES.K	168	188		28900000	3030000	0	0	0	0	0	7620000	0	0	0	0	0	0
P58774	Tropomyosin beta chain	Tpm2	K.LDKENAIDRAEQAEADKKQAEDR.C	13	35		0	10000000	19900000	3270000	7190000	6740000	0	6720000	14100000	7250000	17300000	6510000	0	0
P58774	Tropomyosin beta chain	Tpm2	K.GTEDEVEKYSESVKDAQEKLEQAEKKATD.A	52	80		7160000	2940000	4450000	6730000	9650000	8250000	5690000	26600000	15100000	13800000	8400000	3190000	0	0
P58774	Tropomyosin beta chain	Tpm2	I.DDLEDEVYAQKMKYK.A	254	268		109000000	40700000	26100000	17300000	12500000	11400000	6040000	3730000	0	0	0	0	0	0
P58774	Tropomyosin beta chain	Tpm2	K.LEEAEKAADESERGMKV.I	113	129		39800000	48000000	47900000	15200000	28400000	17200000	2660000	52900000	28400000	29200000	0	0	0	0
P58774	Tropomyosin beta chain	Tpm2	K.AISEELDNALNDI.T	269	281		15500000	21900000	25300000	21700000	19100000	14100000	11200000	27300000	28200000	30100000	28900000	24800000	16300000	11500000
P58774	Tropomyosin beta chain	Tpm2	Y.SESVKDAQEKLEQAEK.K	61	76		0	0	0	0	0	0	7670000	0	1750000	5890000	12100000	12500000	18400000	24700000
P58774	Tropomyosin beta chain	Tpm2	V.KDAQEKLEQAEK.K	65	76		0	4540000	6310000	4740000	10300000	10300000	13900000	1790000	0	5080000	9120000	9060000	0	0
P58774	Tropomyosin beta chain	Tpm2	V.ILEGELERSEER.A	171	182		9560000	12100000	1000000	5450000	12800000	8400000	2880000	4320000	7460000	8590000	4370000	5500000	1140000	0
P58774	Tropomyosin beta chain	Tpm2	K.DEEKM(+15.99)ELQEMQLKEAK.H	137	152	Oxidation (M)	2060000	19600000	3940000	16500000	7960000	3490000	6180000	0	10100000	774000	655000	0	0	0
P58774	Tropomyosin beta chain	Tpm2	E.GELERSEERA.E	174	183		0	0	0	10800000	0	0	0	23500000	13600000	0	3560000	0	0	0
P58774	Tropomyosin beta chain	Tpm2	E.SVKDAQEKL.E	63	71		4760000	8210000	7530000	0	4830000	27100000	4880000	0	0	0	0	0	0	0
P58774	Tropomyosin beta chain	Tpm2	MDAIKKK.M	1	7		95000000	46600000	54300000	31400000	48500000	42700000	38800000	57200000	45700000	41500000	30500000	27800000	17700000	11700000
P58774	Tropomyosin beta chain	Tpm2	K.GTEDEVEKYSESVKDAQEKLEQAEKKATDAEA.D	52	83		16100000	40100000	38500000	29000000	22700000	16300000	13000000	11900000	11500000	6270000	7930000	1320000	0	0
P58774	Tropomyosin beta chain	Tpm2	K.EDKYEEEIKLLEEKLK.E	218	233		12200000	14300000	18300000	3130000	2020000	0	0	9930000	0	9670000	0	0	0	0
P58774	Tropomyosin beta chain	Tpm2	K.YSESVKDAQEKLEQA.E	60	74		0	8730000	0	0	1720000	1820000	4430000	10300000	22800000	598000	5420000	9080000	8090000	13600000
P58774	Tropomyosin beta chain	Tpm2	K.EDKYEEEIKLLEEKLKEAETR.A	218	238		17100000	13100000	13400000	5870000	2800000	3670000	1070000	19400000	3580000	1030000	0	0	0	0
P58774	Tropomyosin beta chain	Tpm2	A.TALQKLEE.A	108	115		3940000	3770000	3630000	4450000	7530000	4070000	3750000	12400000	4730000	3190000	0	3250000	0	977000
P58774	Tropomyosin beta chain	Tpm2	D.EEKMELQEMQLK.E	138	149		5010000	3600000	5930000	4830000	5960000	3760000	2590000	4430000	4380000	5720000	4490000	4070000	2200000	1230000
P58774	Tropomyosin beta chain	Tpm2	K.KLKGTEDEVEKYSESVKDAQEKLEQAEKKATDAEADVA.S	49	86		201000000	140000000	108000000	77800000	43200000	9050000	0	95800000	23200000	1530000	0	0	0	0
P58774	Tropomyosin beta chain	Tpm2	K.MELQEM(+15.99)QLK.E	141	149	Oxidation (M)	1920000	4070000	4340000	4070000	4680000	0	4220000	0	3710000	6300000	8150000	6060000	6980000	7170000
P58774	Tropomyosin beta chain	Tpm2	T.ALQKLEEAEKA.A	109	119		15700000	12800000	17500000	21000000	3900000	17700000	2940000	0	29100000	20900000	9800000	5470000	9270000	2760000
P58774	Tropomyosin beta chain	Tpm2	K.LEKTIDDLEDEVYAQKMK.Y	249	266		19700000	15200000	14400000	9330000	9060000	8080000	4020000	15400000	10400000	2220000	1280000	0	0	0
P58774	Tropomyosin beta chain	Tpm2	R.AM(+15.99)KDEEKMELQEMQLKEA.K	134	151	Oxidation (M)	13500000	20000000	4790000	2340000	0	0	0	25900000	16400000	10200000	657000	0	0	0
P58774	Tropomyosin beta chain	Tpm2	V.KDAQEKLEQA.E	65	74		0	2150000	11600000	17400000	11100000	16600000	30600000	6190000	6760000	8910000	33100000	33900000	30000000	53300000
P58774	Tropomyosin beta chain	Tpm2	K.KATDAEADVASLNRR.I	77	91		8030000	13800000	3310000	9560000	5660000	7120000	1160000	1820000	0	0	5070000	0	0	0
P58774	Tropomyosin beta chain	Tpm2	V.EEELDRAQERL.A	96	106		3120000	15500000	985000	0	0	0	1520000	0	25900000	0	4720000	1710000	2550000	6530000
P58774	Tropomyosin beta chain	Tpm2	R.LATALQKLEEAEKAADESERGMK.V	106	128		216000000	80500000	47900000	11700000	3450000	0	0	104000000	10100000	0	0	0	0	0
P58774	Tropomyosin beta chain	Tpm2	L.VILEGELERS.E	170	179		0	3020000	0	8270000	0	16500000	21000000	469000	0	1480000	2050000	5380000	1300000	0
P58774	Tropomyosin beta chain	Tpm2	T.ALQKLEEAEKAA.D	109	120		11800000	13500000	10500000	4420000	9870000	11800000	10800000	14000000	12300000	9070000	2640000	0	0	0
P58774	Tropomyosin beta chain	Tpm2	R.AMKDEEKMEL.Q	134	143		9690000	7990000	10200000	11400000	18100000	24600000	34400000	7910000	4730000	12400000	14000000	14000000	11500000	20700000
P58774	Tropomyosin beta chain	Tpm2	S.KC(+57.02)GDLEEELKIV.T	189	200	Carbamidomethylation	136000000	190000000	188000000	203000000	231000000	235000000	221000000	129000000	153000000	202000000	108000000	205000000	195000000	129000000
P58774	Tropomyosin beta chain	Tpm2	Q.LEEEQQALQK.K	39	48		10500000	9130000	0	7210000	4660000	1180000	0	3900000	0	5830000	4090000	0	0	0
P58774	Tropomyosin beta chain	Tpm2	E.ELDRAQER.L	98	105		18600000	35000000	65800000	32500000	0	8850000	0	33800000	28200000	17600000	21500000	28400000	17000000	6060000
P58774	Tropomyosin beta chain	Tpm2	E.AETRAEFAER.S	235	244		18900000	0	12100000	32600000	40300000	18600000	28300000	24000000	21900000	0	19300000	0	49900000	0
P58774	Tropomyosin beta chain	Tpm2	R.AEFAERSVAK.L	239	248		55700000	103000000	140000000	167000000	183000000	192000000	215000000	123000000	180000000	521000000	468000000	580000000	493000000	539000000
P58774	Tropomyosin beta chain	Tpm2	E.DEVEKYS.E	55	61		0	0	0	0	0	0	0	0	0	0	0	0	0	56500000
P58774	Tropomyosin beta chain	Tpm2	K.LKEAETRAEFAER.S	232	244		25500000	5190000	9990000	0	0	0	0	13200000	0	0	0	0	0	0
P58774	Tropomyosin beta chain	Tpm2	D.AEADVASLNR.R	81	90		0	1040000	2660000	1980000	6540000	3680000	8960000	3230000	0	0	0	1440000	7480000	13500000
P58774	Tropomyosin beta chain	Tpm2	C.GDLEEELK.I	191	198		0	0	9170000	10300000	15800000	13300000	18500000	0	5660000	11000000	13400000	17600000	24700000	27800000
P58774	Tropomyosin beta chain	Tpm2	E.LDRAQER.L	99	105		0	8210000	13600000	0	0	0	0	6650000	0	0	0	0	0	0
P58774	Tropomyosin beta chain	Tpm2	R.AMKDEEKMELQEMQL.K	134	148		0	5780000	5660000	8580000	5240000	4540000	1290000	10700000	17900000	17400000	12800000	18800000	14200000	5470000
P58774	Tropomyosin beta chain	Tpm2	A.KHIAEDSDRKYEEVARK.L	152	168		27900000	1480000	0	0	0	0	0	5360000	0	0	0	0	0	0
P58774	Tropomyosin beta chain	Tpm2	K.LKGTEDEVEKYSESVKDAQEKLEQAEKKA.T	50	78		46900000	97600000	84700000	128000000	140000000	133000000	111000000	72900000	90000000	54700000	30400000	19500000	13300000	1680000
P58774	Tropomyosin beta chain	Tpm2	R.AMKDEEKMELQEM(+15.99)QLKEAK.H	134	152		13000000	28300000	19500000	10800000	14200000	4580000	3670000	21100000	808000	981000	0	0	0	0
P58774	Tropomyosin beta chain	Tpm2	L.EAQADKYSTK.E	208	217		21300000	42500000	29600000	33500000	56300000	29600000	85300000	40300000	63400000	109000000	118000000	187000000	185000000	178000000
P58774	Tropomyosin beta chain	Tpm2	I.QLVEEELDRA.Q	93	102		0	4660000	4960000	3240000	8150000	0	3480000	2950000	8520000	6210000	4380000	4480000	3780000	0
P58774	Tropomyosin beta chain	Tpm2	S.LEAQADKYSTK.E	207	217		0	0	4430000	0	0	0	21500000	0	0	5160000	21800000	17100000	39400000	20500000
P58774	Tropomyosin beta chain	Tpm2	D.DLEDEVYAQKM(+15.99)K.Y	255	266		10500000	11100000	11900000	9390000	9860000	9190000	10100000	11900000	3900000	6130000	2200000	1710000	0	0
P58774	Tropomyosin beta chain	Tpm2	K.GTEDEVEKYSESVKDAQEKLEQAEK.K	52	76		160000000	266000000	307000000	339000000	378000000	362000000	337000000	274000000	478000000	694000000	878000000	813000000	864000000	539000000
P58774	Tropomyosin beta chain	Tpm2	K.QAEDRC(+57.02)KQLEEEQQALQK.K	31	48		0	0	0	0	0	0	0	4270000	10800000	7110000	9580000	8820000	7540000	927000
P58774	Tropomyosin beta chain	Tpm2	Y.SESVKDAQEKLEQAEKKA.T	61	78		6120000	7650000	8220000	11400000	12500000	27700000	30800000	7900000	2380000	0	0	4610000	3870000	0
P58774	Tropomyosin beta chain	Tpm2	E.DEVYAQKMK.Y	258	266		14300000	13400000	21100000	26000000	37800000	44500000	50700000	0	42200000	11300000	0	0	0	17900000
P58774	Tropomyosin beta chain	Tpm2	V.EEELDRAQERLATALQKLEEAEKAA.D	96	120		124000000	32900000	9840000	0	0	0	0	7970000	0	0	0	0	0	0
P58774	Tropomyosin beta chain	Tpm2	T.IDDLEDEVYAQKMK.Y	253	266		0	8760000	0	0	12700000	13100000	13400000	0	0	0	0	0	0	0
P58774	Tropomyosin beta chain	Tpm2	K.SLEAQADKYSTK.E	206	217		27600000	94400000	92100000	74800000	124000000	126000000	112000000	111000000	159000000	231000000	285000000	408000000	375000000	291000000
P58774	Tropomyosin beta chain	Tpm2	L.EEKLKEAETRA.E	229	239		28600000	0	0	0	0	0	0	0	0	0	0	0	0	0
P58774	Tropomyosin beta chain	Tpm2	K.LEQAEKKATDAEADVA.S	71	86		8010000	11800000	11200000	9390000	13100000	2520000	5620000	7770000	7890000	9670000	3410000	2370000	7660000	7460000
P58774	Tropomyosin beta chain	Tpm2	R.C(+57.02)KQLEEEQQALQK.K	36	48	Carbamidomethylation	2690000	4100000	9220000	4460000	6190000	3270000	2680000	1860000	0	8430000	0	0	0	0
P58774	Tropomyosin beta chain	Tpm2	L.LEEKLKEA.E	228	235		0	5120000	0	0	9780000	13800000	14200000	1390000	0	0	0	0	0	0
P58774	Tropomyosin beta chain	Tpm2	K.LVILEGELERSEERAEVAES.K	169	188		11100000	1800000	0	0	0	0	0	0	0	0	0	0	0	0
P58774	Tropomyosin beta chain	Tpm2	A.EVAESKC(+57.02)GDLEEELKIV.T	184	200	Carbamidomethylation	20100000	29100000	30300000	30800000	44400000	37800000	29400000	29200000	39900000	33900000	32800000	28200000	18700000	8440000
P58774	Tropomyosin beta chain	Tpm2	A.LQKLEEAEKAADESERGMKVI.E	110	130		57100000	30700000	2480000	672000	0	0	0	14700000	0	0	0	0	0	0
P58774	Tropomyosin beta chain	Tpm2	K.SLEAQADKYSTKEDKYEEEIKLLEEKLKEAETR.A	206	238		26900000	10700000	0	0	0	0	0	22800000	1980000	0	0	0	0	0
P58774	Tropomyosin beta chain	Tpm2	V.AESKC(+57.02)GDLEEELKIV.T	186	200	Carbamidomethylation	22700000	21800000	27200000	28500000	26400000	32100000	26900000	26800000	36300000	30700000	38800000	34500000	36300000	6570000
P58774	Tropomyosin beta chain	Tpm2	R.LATALQKL.E	106	113		5100000	5190000	5320000	2620000	5200000	4760000	1810000	2050000	1730000	0	0	0	0	0
P58774	Tropomyosin beta chain	Tpm2	C.GDLEEELKI.V	191	199		47800000	45200000	68800000	70000000	76700000	79900000	92400000	33400000	44100000	37200000	51900000	64100000	61200000	67400000
P58774	Tropomyosin beta chain	Tpm2	R.LATALQKLEEAEKAADESERGM(+15.99)K.V	106	128	Oxidation (M)	9880000	5170000	4640000	0	0	0	0	0	0	0	0	0	0	0
P58774	Tropomyosin beta chain	Tpm2	K.EAETRAEFAER.S	234	244		438000000	313000000	378000000	214000000	117000000	72800000	29800000	257000000	128000000	86400000	31000000	18400000	9340000	25600000
P58774	Tropomyosin beta chain	Tpm2	V.EEELDRAQERLAT.A	96	108		4690000	5410000	3570000	7940000	4970000	0	0	2230000	0	0	2890000	2310000	513000	0
P58774	Tropomyosin beta chain	Tpm2	E.LQEMQLK.E	143	149		0	954000	9210000	0	10600000	7530000	9890000	0	0	0	0	1920000	927000	0
P58774	Tropomyosin beta chain	Tpm2	Y.SESVKDAQEKLEQAEKKATDAEADVA.S	61	86		8830000	7950000	5540000	5730000	2370000	0	2460000	4730000	0	0	0	0	0	0
P58774	Tropomyosin beta chain	Tpm2	A.TALQKLEEA.E	108	116		2460000	7230000	1450000	3700000	7390000	5300000	2560000	0	712000	0	0	0	333000	4680000
P58774	Tropomyosin beta chain	Tpm2	K.YSESVKDAQEKLEQAEKK.A	60	77		0	0	0	0	3900000	8140000	8350000	3030000	9570000	18500000	18600000	35900000	20200000	11600000
P58774	Tropomyosin beta chain	Tpm2	A.KHIAEDSDRKYEEV.A	152	165		0	0	0	0	0	11000000	11000000	8110000	0	0	0	0	0	0
P58774	Tropomyosin beta chain	Tpm2	D.DLEDEVYAQKMK.Y	255	266		155000000	154000000	138000000	140000000	127000000	123000000	116000000	135000000	91800000	32800000	19400000	18300000	9210000	11400000
P58774	Tropomyosin beta chain	Tpm2	K.YSESVKDAQEKLEQAEK.K	60	76		0	0	0	12200000	576000	5570000	7960000	0	10300000	34300000	55500000	80600000	91100000	83200000
P58774	Tropomyosin beta chain	Tpm2	R.IQLVEEELDR.A	92	101		8500000	3450000	4260000	0	0	2820000	0	6080000	1690000	244000	0	0	0	0
P58774	Tropomyosin beta chain	Tpm2	N.RAMKDEEKMELQEMQLKEAK.H	133	152		8380000	6290000	2780000	8190000	4230000	3530000	3870000	14500000	10200000	14100000	14200000	14900000	15200000	15000000
P58774	Tropomyosin beta chain	Tpm2	K.TIDDLEDEVYAQKM.K	252	265		669000	902000	2450000	0	3910000	6240000	7740000	3130000	3520000	4890000	4310000	5240000	2570000	3080000
P58774	Tropomyosin beta chain	Tpm2	K.GTEDEVEKYSESVKDAQEKLEQAEKK.A	52	77		69900000	112000000	144000000	132000000	128000000	111000000	106000000	147000000	231000000	349000000	349000000	280000000	259000000	135000000
P58774	Tropomyosin beta chain	Tpm2	I.LEGELERSEERAEVAES.K	172	188		19000000	0	788000	0	0	0	0	1690000	0	0	0	0	0	0
P58774	Tropomyosin beta chain	Tpm2	R.LATALQKLE.E	106	114		4740000	4090000	4160000	3860000	3020000	2240000	0	4200000	1570000	0	0	0	0	0
P58774	Tropomyosin beta chain	Tpm2	E.EELDRAQERLA.T	97	107		8590000	7490000	5650000	7170000	2460000	9800000	1870000	2710000	0	0	0	0	0	0
P58774	Tropomyosin beta chain	Tpm2	K.KLKGTEDEVEKYSESVKDAQEKLEQAEKK.A	49	77		0	12900000	4570000	8260000	5110000	1550000	2680000	0	5210000	927000	0	0	0	0
P58774	Tropomyosin beta chain	Tpm2	K.GTEDEVEKYSESVKDAQEK.L	52	70		4730000	5640000	8560000	9150000	12200000	4260000	0	6160000	12500000	25800000	25000000	27300000	19400000	27300000
P58774	Tropomyosin beta chain	Tpm2	R.AMKDEEKMELQEM(+15.99).Q	134	146	Oxidation (M)	0	0	0	2230000	3190000	4000000	2920000	0	2900000	2270000	4620000	4100000	3130000	5470000
P58774	Tropomyosin beta chain	Tpm2	Q.LVEEELDRAQER.L	94	105		2630000	7550000	3360000	6390000	2880000	8380000	5060000	0	0	0	0	0	3640000	3240000
P58774	Tropomyosin beta chain	Tpm2	R.LATALQKLEEAEKAADESERGM(+15.99)KVI.E	106	130	Oxidation (M)	48300000	13800000	3410000	0	0	0	0	6060000	0	0	0	0	0	0
P58774	Tropomyosin beta chain	Tpm2	N.RRIQLVEEELDRA.Q	90	102		7960000	0	1320000	0	0	0	0	5870000	0	0	0	0	0	0
P58774	Tropomyosin beta chain	Tpm2	K.M(+15.99)ELQEMQLK.E	141	149	Oxidation (M)	0	2590000	3220000	4210000	0	3550000	3320000	0	0	6930000	0	2780000	4700000	1930000
P58774	Tropomyosin beta chain	Tpm2	R.LATALQKLEEAEKAA.D	106	120		555000000	437000000	349000000	221000000	169000000	147000000	88000000	415000000	88800000	8230000	2860000	2550000	3460000	4570000
P58774	Tropomyosin beta chain	Tpm2	V.EEELDRAQERLATALQKLEEAEKAADESERGMK.V	96	128		24600000	0	0	0	0	0	0	0	0	0	0	0	0	0
P58774	Tropomyosin beta chain	Tpm2	E.GELERSEERAEVA.E	174	186		3100000	4360000	2530000	0	4600000	802000	6210000	5520000	1310000	0	0	0	0	0
P58774	Tropomyosin beta chain	Tpm2	K.AISEELDNALNDITSL	269	284		7820000	4750000	8240000	6180000	3040000	1120000	0	6630000	10300000	7240000	7040000	2360000	2560000	1570000
P58774	Tropomyosin beta chain	Tpm2	A.ESKC(+57.02)GDLEEELKIV.T	187	200	Carbamidomethylation	185000000	253000000	227000000	280000000	267000000	219000000	195000000	231000000	269000000	228000000	180000000	165000000	100000000	63600000
P58774	Tropomyosin beta chain	Tpm2	R.AMKDEEKMELQEMQLKEAKHI.A	134	154		18000000	0	0	0	0	0	0	0	0	0	0	0	0	0
P58774	Tropomyosin beta chain	Tpm2	I.LEGELERSEERAEVAESKC(+57.02)GDLEEELKIV.T	172	200	Carbamidomethylation	102000000	64700000	33900000	14900000	14300000	3970000	4570000	106000000	45600000	11000000	5430000	2120000	0	0
P58774	Tropomyosin beta chain	Tpm2	Y.STKEDKYEEEI.K	215	225		0	2790000	0	5410000	8050000	14500000	23100000	0	3910000	16300000	15100000	16300000	18900000	29900000
P58774	Tropomyosin beta chain	Tpm2	K.DEEKM(+15.99)ELQEMQLK.E	137	149	Oxidation (M)	0	1890000	10300000	6460000	6640000	7000000	778000	6510000	2250000	8510000	8630000	6910000	3620000	4150000
P58774	Tropomyosin beta chain	Tpm2	L.QKLEEAEKA.A	111	119		0	6810000	2410000	4370000	9120000	7240000	5650000	0	7420000	5790000	9850000	7350000	22300000	8330000
P58774	Tropomyosin beta chain	Tpm2	D.DLEDEVYAQKMKYK.A	255	268		15800000	8040000	2520000	1100000	3160000	0	0	0	4450000	3270000	3300000	0	0	2360000
P58774	Tropomyosin beta chain	Tpm2	S.LEAQADKYSTKEDKYEEEI.K	207	225		0	0	0	2650000	7190000	7350000	6670000	0	1860000	957000	6960000	5630000	3940000	0
P58774	Tropomyosin beta chain	Tpm2	L.LEEKLKEAET.R	228	237		6470000	4570000	3240000	2310000	2580000	2170000	0	4240000	0	0	0	0	0	0
P58774	Tropomyosin beta chain	Tpm2	K.TIDDLEDEVYAQKM(+15.99)K.Y	252	266	Oxidation (M)	66300000	21900000	29300000	15200000	23400000	14900000	19700000	37900000	16400000	7140000	13400000	9590000	4540000	0
P58774	Tropomyosin beta chain	Tpm2	T.EDEVEKYSESVKDAQEKLEQAEKKA.T	54	78		0	0	0	0	13100000	20200000	16800000	0	4260000	0	0	0	0	0
P58774	Tropomyosin beta chain	Tpm2	R.KLVILEGELERSEERAEVAESK.C	168	189		15900000	0	0	0	0	0	0	0	0	0	0	0	0	0
P58774	Tropomyosin beta chain	Tpm2	K.ATDAEADVASLNR.R	78	90		0	549000	460000	1040000	0	0	0	1030000	1590000	4270000	1160000	1070000	4280000	5030000
P58774	Tropomyosin beta chain	Tpm2	E.DEVEKYSESVK.D	55	65		2290000	0	0	0	0	3140000	27600000	0	1460000	5380000	9240000	10100000	6670000	34600000
P58774	Tropomyosin beta chain	Tpm2	L.VILEGELERSEERA.E	170	183		0	0	2600000	3630000	5420000	3540000	3990000	0	3890000	890000	1650000	1450000	0	0
P58774	Tropomyosin beta chain	Tpm2	K.AISEELDNALNDIT.S	269	282		85700000	80000000	101000000	77600000	72600000	55900000	48100000	66600000	43500000	45300000	38800000	37700000	32400000	10400000
P58774	Tropomyosin beta chain	Tpm2	N.RAMKDEEKMELQEM.Q	133	146		0	0	0	3700000	5070000	5090000	0	1730000	4220000	4230000	0	2650000	0	0
P58774	Tropomyosin beta chain	Tpm2	L.VILEGELERSEERAEVA.E	170	186		0	5450000	4340000	4480000	3230000	2100000	0	2780000	1410000	919000	0	0	0	0
P58774	Tropomyosin beta chain	Tpm2	I.AEDSDRKYEEVA.R	155	166		11300000	23600000	20500000	36800000	41300000	48600000	54300000	36900000	46800000	41900000	80200000	48000000	44100000	36100000
P58774	Tropomyosin beta chain	Tpm2	D.DLEDEVYAQKM.K	255	265		0	2240000	3050000	1490000	2210000	2110000	2340000	2200000	1790000	2280000	1000000	738000	0	0
P58774	Tropomyosin beta chain	Tpm2	A.TALQKLEEAEKAADESERGMK.V	108	128		123000000	78600000	62100000	38000000	24600000	14500000	13900000	108000000	37100000	21400000	9450000	5110000	1750000	0
P58774	Tropomyosin beta chain	Tpm2	E.DEVEKYSESVKDAQEKLEQAEKKA.T	55	78		2760000	12900000	81800000	53300000	77900000	120000000	130000000	15500000	29400000	31700000	31900000	25000000	11800000	4770000
P58774	Tropomyosin beta chain	Tpm2	I.DRAEQAEADKKQAEDRC(+57.02)KQLEEEQQALQK.K	20	48		0	3480000	2290000	3460000	1830000	2300000	1760000	3680000	5840000	0	0	0	0	0
P58774	Tropomyosin beta chain	Tpm2	D.EVEKYSESVKDAQEKLEQAEKKA.T	56	78		2210000	3410000	2200000	2980000	4090000	6740000	5470000	0	0	0	0	0	0	0
P58774	Tropomyosin beta chain	Tpm2	K.EAKHIAEDSDRKYEEVARK.L	150	168		14300000	0	0	0	0	0	0	0	0	0	0	0	0	0
P58774	Tropomyosin beta chain	Tpm2	K.DAQEKLEQA.E	66	74		0	0	0	0	0	0	0	0	0	0	0	6010000	6450000	12400000
P58774	Tropomyosin beta chain	Tpm2	K.EAETRAEFAERSVAK.L	234	248		0	3420000	3470000	7100000	0	2790000	0	4780000	0	0	0	0	0	0
P58774	Tropomyosin beta chain	Tpm2	T.IDDLEDEVYAQK.M	253	264		0	2240000	0	4460000	0	0	883000	0	4350000	6080000	0	6130000	6070000	7940000
P58774	Tropomyosin beta chain	Tpm2	K.LDKENAIDRAEQAEADKKQAEDRC(+57.02)K.Q	13	37	Carbamidomethylation	6330000	14100000	30000000	2120000	0	0	0	8720000	0	27200000	0	0	0	0
P58774	Tropomyosin beta chain	Tpm2	M.KDEEKMELQEMQLK.E	136	149		0	0	1160000	0	0	8560000	5260000	2630000	1950000	0	1740000	0	0	0
P58774	Tropomyosin beta chain	Tpm2	D.EVEKYSESVKDAQEKLEQAEKKATDAEADVA.S	56	86		10600000	3460000	3450000	1290000	0	1530000	0	6830000	1580000	0	0	0	0	0
P58774	Tropomyosin beta chain	Tpm2	L.EDEVYAQKMK.Y	257	266		1440000	2980000	5890000	3330000	817000	1320000	0	1670000	539000	0	0	0	0	0
P58774	Tropomyosin beta chain	Tpm2	D.LEDEVYAQK.M	256	264		30700000	28600000	12800000	36900000	20200000	46600000	31000000	30900000	33900000	30300000	30000000	28300000	20700000	17100000
P58774	Tropomyosin beta chain	Tpm2	A.TALQKLEEAEKAADESERGM(+15.99)K.V	108	128	Oxidation (M)	9320000	7900000	6910000	2670000	0	0	0	10000000	0	0	0	0	0	0
P58774	Tropomyosin beta chain	Tpm2	K.YSTKEDKYEEE.I	214	224		3790000	4180000	6410000	3960000	3770000	3620000	1940000	10000000	6570000	12500000	8760000	7860000	0	0
P58774	Tropomyosin beta chain	Tpm2	K.DEEKMELQEMQLKEA.K	137	151		3750000	5900000	4450000	5050000	2660000	1240000	0	8670000	6520000	4830000	3180000	1560000	0	0
P58774	Tropomyosin beta chain	Tpm2	R.AM(+15.99)KDEEKMELQEM.Q	134	146	Oxidation (M)	0	0	0	3180000	4930000	7670000	9430000	1840000	6210000	9120000	12400000	13400000	11300000	8420000
P58774	Tropomyosin beta chain	Tpm2	V.ILEGELERSEERAEVAESKC(+57.02)GDLEEELKIV.T	171	200	Carbamidomethylation	10600000	5070000	0	0	0	0	0	8150000	2750000	0	0	0	0	0
P58774	Tropomyosin beta chain	Tpm2	K.KLKGTEDEVEKYSESVKDA.Q	49	67		0	2520000	0	3130000	6010000	6650000	8270000	0	0	0	0	0	0	0
P58774	Tropomyosin beta chain	Tpm2	R.IQLVEEELDRAQERLA.T	92	107		218000000	76800000	52300000	14400000	2500000	0	0	73100000	2790000	0	0	0	0	0
P58774	Tropomyosin beta chain	Tpm2	A.TALQKLEEAEKAAD.E	108	121		1570000	2220000	1450000	616000	0	2820000	1700000	8730000	3460000	2820000	4340000	5180000	5190000	4790000
P58774	Tropomyosin beta chain	Tpm2	K.KLKGTEDEVEKYSESVKDAQEKLEQAEKKA.T	49	78		26800000	16800000	30000000	24600000	47600000	48000000	37300000	10400000	14700000	0	1920000	0	0	0
P58774	Tropomyosin beta chain	Tpm2	K.LVILEGELERSEERAEVAESK.C	169	189		15700000	0	0	0	0	0	0	0	0	0	0	0	0	0
P58774	Tropomyosin beta chain	Tpm2	R.LATALQKLEEAEKAADESERGMKVI.E	106	130		356000000	84900000	52500000	10600000	0	0	0	58900000	0	0	0	0	0	0
P58774	Tropomyosin beta chain	Tpm2	V.KDAQEKLEQAEKKATDAEADVA.S	65	86		62500000	84100000	69300000	76900000	51700000	57900000	50300000	75400000	60200000	40500000	29200000	11700000	1670000	2950000
P58774	Tropomyosin beta chain	Tpm2	S.KC(+57.02)GDLEEELK.I	189	198	Carbamidomethylation	1150000	27900000	3940000	5080000	31200000	14200000	8700000	30500000	2960000	6570000	15800000	21100000	25600000	38800000
P58774	Tropomyosin beta chain	Tpm2	K.DEEKMELQEM(+15.99)QLK.E	137	149	Oxidation (M)	0	997000	1760000	553000	2150000	2180000	3090000	0	2440000	3970000	5440000	2080000	2270000	4100000
P58774	Tropomyosin beta chain	Tpm2	A.TALQKLEEAEKAADESERGM(+15.99)KV.I	108	129	Oxidation (M)	4680000	4110000	0	0	0	0	0	2810000	0	0	0	0	0	0
P58774	Tropomyosin beta chain	Tpm2	K.KLKGTEDEVEKYSESVKDAQEKLEQA.E	49	74		0	4320000	0	2260000	2750000	5230000	6230000	0	0	0	0	0	0	0
P58774	Tropomyosin beta chain	Tpm2	K.QLEEEQQALQKKLK.G	38	51		8970000	9810000	7840000	3910000	2490000	0	0	3450000	0	0	0	0	0	0
P58774	Tropomyosin beta chain	Tpm2	A.EDSDRKYEEVAR.K	156	167		3170000	0	4260000	7260000	0	0	0	3160000	0	0	0	0	0	0
P58774	Tropomyosin beta chain	Tpm2	E.EEIKLLEEKLKEAETR.A	223	238		0	0	6100000	8580000	0	2010000	1250000	2910000	0	1740000	0	0	0	0
P58774	Tropomyosin beta chain	Tpm2	K.LKGTEDEVEKY.S	50	60		0	3090000	1450000	2410000	1270000	1770000	1680000	0	0	0	2410000	1670000	1950000	4280000
P58774	Tropomyosin beta chain	Tpm2	K.LKGTEDEVEKYS.E	50	61		0	6360000	0	0	0	3030000	7880000	0	0	0	0	999000	1740000	0
P58774	Tropomyosin beta chain	Tpm2	L.ATALQKLEEAEKA.A	107	119		7650000	11400000	11200000	16100000	15700000	10900000	15000000	13700000	8580000	1070000	2630000	0	1520000	0
P58774	Tropomyosin beta chain	Tpm2	I.DDLEDEVYAQKM(+15.99)KYK.A	254	268	Oxidation (M)	8690000	4420000	0	0	0	0	0	0	0	0	0	0	0	0
P58774	Tropomyosin beta chain	Tpm2	R.AMKDEEKM(+15.99)ELQEMQLK.E	134	149	Oxidation (M)	0	4620000	11000000	6840000	4150000	6380000	1910000	2660000	0	8050000	5770000	1740000	0	0
P58774	Tropomyosin beta chain	Tpm2	K.LEEAEKAADESERGM(+15.99)K.V	113	128	Oxidation (M)	1090000	2170000	3600000	0	0	0	0	4500000	0	0	0	0	0	0
P58774	Tropomyosin beta chain	Tpm2	E.DSDRKYEEVAR.K	157	167		91000000	205000000	181000000	130000000	146000000	133000000	54000000	117000000	71600000	32500000	16400000	11500000	0	0
P58774	Tropomyosin beta chain	Tpm2	K.C(+57.02)GDLEEELK.I	190	198	Carbamidomethylation	0	0	0	0	0	0	0	0	0	0	5710000	0	8770000	8310000
P58774	Tropomyosin beta chain	Tpm2	S.KC(+57.02)GDLEEELKI.V	189	199	Carbamidomethylation	0	344000	1290000	3620000	1860000	3660000	1970000	0	0	0	2170000	0	1060000	2020000
P58774	Tropomyosin beta chain	Tpm2	K.EDKYEEEIKLL.E	218	228		1790000	2370000	8360000	3330000	0	0	0	6560000	3050000	3250000	0	0	0	1250000
P58774	Tropomyosin beta chain	Tpm2	K.KLKGTEDEVEKYSESVKDAQEKLEQAEK.K	49	76		0	10300000	16700000	7700000	1110000	9530000	5450000	0	0	1480000	0	0	0	0
P58774	Tropomyosin beta chain	Tpm2	K.DEEKMELQEM(+15.99)QLKEAK.H	137	152	Oxidation (M)	0	0	4090000	1220000	3310000	2460000	3920000	1580000	2270000	0	0	0	0	0
P58774	Tropomyosin beta chain	Tpm2	A.ESKC(+57.02)GDLEEELKI.V	187	199	Carbamidomethylation	0	2400000	1880000	4050000	2120000	11100000	2070000	0	3640000	2300000	2860000	1840000	8210000	0
P58774	Tropomyosin beta chain	Tpm2	R.KLVILEGELERSEERAEV.A	168	185		29700000	22200000	17300000	11200000	3590000	1470000	0	14200000	4390000	0	0	0	0	0
P58774	Tropomyosin beta chain	Tpm2	R.AEFAERSVAKLEK.T	239	251		24100000	11200000	9630000	7010000	6310000	4530000	0	5530000	0	0	0	0	0	0
P58774	Tropomyosin beta chain	Tpm2	T.EDEVEKYSESVKDAQEKLEQAEKKATDAEADVA.S	54	86		5660000	7290000	3200000	1030000	3940000	0	0	0	0	0	0	0	0	0
P58774	Tropomyosin beta chain	Tpm2	K.KLKGTEDEVEKYS.E	49	61		0	0	11400000	0	0	0	6550000	0	0	0	0	0	0	0
P58774	Tropomyosin beta chain	Tpm2	E.DSDRKYEEV.A	157	165		0	0	0	0	0	1660000	0	0	0	5810000	0	5780000	4600000	0
P58774	Tropomyosin beta chain	Tpm2	K.LEKTIDDLEDEVYAQK.M	249	264		0	2100000	1210000	0	0	0	887000	1980000	2810000	2810000	0	0	0	0
P58774	Tropomyosin beta chain	Tpm2	R.KLVILEGELERSEER.A	168	182		1290000	1540000	4030000	2220000	570000	13200000	4660000	0	0	0	0	0	0	0
P58774	Tropomyosin beta chain	Tpm2	I.SEELDNALNDIT.S	271	282		40100000	44600000	40400000	43300000	46800000	44500000	42800000	26300000	24500000	21000000	22500000	22300000	24900000	19400000
P58774	Tropomyosin beta chain	Tpm2	A.LQKLEEAEKAADESERGM(+15.99)KVI.E	110	130	Oxidation (M)	12400000	0	0	0	0	0	0	0	0	0	0	0	0	0
P58774	Tropomyosin beta chain	Tpm2	K.YSTKEDKYEEEI.K	214	225		0	0	0	2120000	656000	0	1330000	0	841000	1780000	4350000	3840000	2510000	2880000
P58774	Tropomyosin beta chain	Tpm2	K.KLKGTEDEVEKYSESV.K	49	64		0	6620000	6270000	11500000	14900000	12400000	28700000	2500000	17500000	5290000	2730000	3720000	956000	0
P58774	Tropomyosin beta chain	Tpm2	A.ESKC(+57.02)GDLEEELK.I	187	198		0	2590000	0	5190000	4160000	9430000	6170000	1310000	2340000	3380000	2370000	3790000	1570000	2390000
P58774	Tropomyosin beta chain	Tpm2	K.SLEAQADKYSTKEDKYEEEIKLLEEKLKEAETRAEFAER.S	206	244		8120000	0	0	0	0	0	0	0	0	0	0	0	0	0
P58774	Tropomyosin beta chain	Tpm2	K.DEEKMELQEMQL.K	137	148		0	522000	729000	1320000	1450000	1890000	1320000	1210000	1460000	2290000	2030000	0	1040000	0
P58774	Tropomyosin beta chain	Tpm2	R.AM(+15.99)KDEEKMELQ.E	134	144		0	0	0	0	1860000	1130000	2490000	0	0	0	2210000	2010000	3330000	3110000
P58774	Tropomyosin beta chain	Tpm2	M.ELQEMQLKEAK.H	142	152		0	1060000	4020000	2510000	4060000	5320000	4330000	4620000	2230000	0	2670000	0	0	0
P58774	Tropomyosin beta chain	Tpm2	R.KLVILEGELER.S	168	178		121000000	188000000	272000000	206000000	1070000	97000000	61200000	95200000	76300000	83200000	34700000	15100000	2620000	4260000
P58774	Tropomyosin beta chain	Tpm2	E.EEIKLLEEKLKEAET.R	223	237		3750000	5070000	11100000	8800000	4950000	0	0	5650000	4930000	3900000	0	0	0	0
P58774	Tropomyosin beta chain	Tpm2	I.LEGELERSEERAEVAESK.C	172	189		0	1060000	0	0	0	0	0	5350000	1180000	534000	0	0	0	0
P58774	Tropomyosin beta chain	Tpm2	R.IQLVEEELDRAQER.L	92	105		118000000	66400000	72200000	21300000	2570000	1200000	0	113000000	11300000	7780000	0	0	0	741000
P58774	Tropomyosin beta chain	Tpm2	E.SVKDAQEKLEQAEKKATDAEADVA.S	63	86		6320000	3550000	0	0	0	0	0	0	0	0	0	0	0	0
P58774	Tropomyosin beta chain	Tpm2	K.LEEAEKAADESERGM(+15.99)KVI.E	113	130		26100000	7580000	10100000	4120000	0	0	0	14500000	0	0	0	0	0	0
P58774	Tropomyosin beta chain	Tpm2	L.VILEGELERSEER.A	170	182		4250000	0	0	6110000	0	0	0	0	0	0	0	0	0	0
P58774	Tropomyosin beta chain	Tpm2	V.EEELDRAQ.E	96	103		27700000	0	19700000	14200000	31400000	24100000	0	18000000	16100000	0	9320000	0	0	0
P58774	Tropomyosin beta chain	Tpm2	D.AEADVASLNRR.I	81	91		9800000	10900000	23500000	27700000	37900000	8830000	30100000	7100000	14300000	40700000	32500000	41400000	31400000	35600000
P58774	Tropomyosin beta chain	Tpm2	E.SKC(+57.02)GDLEEELKIV.T	188	200	Carbamidomethylation	0	4310000	2820000	6030000	2690000	4370000	3010000	1930000	2630000	2340000	0	4020000	5900000	0
P58774	Tropomyosin beta chain	Tpm2	K.ATDAEADVASLNRR.I	78	91		0	2790000	0	0	0	0	0	0	0	3620000	3060000	4470000	0	0
P58774	Tropomyosin beta chain	Tpm2	T.ALQKLEEAEK.A	109	118		0	0	0	3870000	13900000	3360000	2110000	0	3140000	5070000	7260000	1120000	1600000	0
P58774	Tropomyosin beta chain	Tpm2	R.RIQLVEEELDRAQER.L	91	105		5860000	0	0	0	0	0	0	0	0	0	0	0	0	0
P58774	Tropomyosin beta chain	Tpm2	V.ILEGELERSEERAEV.A	171	185		2680000	3240000	2540000	885000	1790000	0	0	1480000	3760000	1960000	0	0	0	0
P58774	Tropomyosin beta chain	Tpm2	L.DRAQERLA.T	100	107		0	0	0	0	9630000	0	0	0	0	0	0	0	0	0
P58774	Tropomyosin beta chain	Tpm2	G.TEDEVEKYSESV.K	53	64		0	0	0	0	0	3170000	1500000	0	0	0	0	1140000	3390000	3870000
P58774	Tropomyosin beta chain	Tpm2	E.FAERSVAK.L	241	248		0	0	0	3580000	0	3340000	0	0	0	6120000	0	0	0	0
P58774	Tropomyosin beta chain	Tpm2	K.TIDDLEDEVYAQK.M	252	264		72800000	109000000	137000000	143000000	139000000	129000000	124000000	142000000	211000000	260000000	287000000	296000000	278000000	219000000
P58774	Tropomyosin beta chain	Tpm2	K.GTEDEVEKYSESVKDAQEKLEQAEKKAT.D	52	79		6170000	13300000	12400000	14200000	23000000	28500000	32600000	6250000	11100000	8290000	0	0	1650000	0
P58774	Tropomyosin beta chain	Tpm2	K.SLEAQADKYSTKEDKYE.E	206	222		0	7460000	6200000	23700000	22900000	44500000	64500000	1050000	10800000	15900000	20600000	10800000	21400000	9820000
P58774	Tropomyosin beta chain	Tpm2	A.ESKC(+57.02)GDLEEEL.K	187	197	Carbamidomethylation	0	1620000	2280000	5050000	7440000	2650000	17400000	700000	2220000	4440000	4360000	6710000	6710000	6050000
P58774	Tropomyosin beta chain	Tpm2	N.AIDRAEQAEADKKQAEDRC(+57.02)KQLEEEQQALQK.K	18	48	Carbamidomethylation	855000	5240000	0	0	0	0	0	0	0	0	0	0	0	0
P58774	Tropomyosin beta chain	Tpm2	I.ENRAMKDEEKMELQEMQLKEAK.H	131	152		5150000	0	0	0	0	0	0	0	0	0	0	0	0	0
P58774	Tropomyosin beta chain	Tpm2	D.EVEKYSESVKDAQEKLEQAEK.K	56	76		0	0	0	414000	2270000	2440000	2000000	0	0	1840000	2020000	1930000	0	0
P58774	Tropomyosin beta chain	Tpm2	K.KLKGTEDEVEKYSESVK.D	49	65		777000	2850000	9690000	6180000	11700000	13900000	11600000	0	4620000	2790000	0	0	0	0
P58774	Tropomyosin beta chain	Tpm2	K.EAETRAEFAERSV.A	234	246		17600000	1180000	3970000	0	941000	0	2890000	0	0	0	12300000	11700000	0	9270000
P58774	Tropomyosin beta chain	Tpm2	K.MELQEMQL.K	141	148		0	551000	0	0	789000	1280000	928000	0	1350000	1310000	1970000	1540000	1250000	1050000
P58774	Tropomyosin beta chain	Tpm2	R.KLVILEGELE.R	168	177		0	392000	2370000	2350000	3510000	1390000	1760000	0	0	0	0	0	0	0
P58774	Tropomyosin beta chain	Tpm2	K.MQMLKLD.K	8	14		246000	1090000	1260000	1030000	1220000	0	0	2390000	1150000	0	0	0	0	0
P58774	Tropomyosin beta chain	Tpm2	E.ELDRAQERLA.T	98	107		2690000	6680000	1900000	0	4930000	0	0	7960000	0	1010000	0	0	13400000	0
P58774	Tropomyosin beta chain	Tpm2	V.EEELDRAQERLATALQKLEEAEK.A	96	118		10500000	1090000	998000	0	0	0	0	0	0	0	0	0	0	0
P58774	Tropomyosin beta chain	Tpm2	N.LKSLEAQADKYSTKEDKYEEEI.K	204	225		0	1060000	3220000	1700000	3030000	3030000	2390000	0	0	1520000	1770000	0	0	3750000
P58774	Tropomyosin beta chain	Tpm2	K.AISEELDNALND.I	269	280		3210000	2170000	2930000	1290000	0	0	0	0	0	0	0	0	0	0
P58774	Tropomyosin beta chain	Tpm2	K.EAKHIAEDSDRKYEEVAR.K	150	167		11700000	0	0	0	0	0	0	0	0	0	0	0	0	0
P58774	Tropomyosin beta chain	Tpm2	A.LQKLEEAEKAADESERGMKV.I	110	129		15200000	5210000	5720000	1810000	0	993000	0	2060000	0	0	0	0	0	0
P58774	Tropomyosin beta chain	Tpm2	S.KC(+57.02)GDLEEEL.K	189	197	Carbamidomethylation	0	3890000	4190000	7140000	6930000	7600000	11500000	0	5840000	6610000	6810000	10800000	13900000	19700000
P58774	Tropomyosin beta chain	Tpm2	L.ATALQKLEEAEKAA.D	107	120		3490000	11200000	3400000	2420000	3660000	5860000	1570000	1290000	1610000	0	0	0	0	0
P58774	Tropomyosin beta chain	Tpm2	R.AMKDEEKM(+15.99)ELQEMQLKEAK.H	134	152	Oxidation (M)	7190000	27700000	11600000	9940000	4830000	11800000	0	12800000	15000000	1770000	1590000	0	0	0
P58774	Tropomyosin beta chain	Tpm2	L.EEELKIV.T	194	200		0	0	0	0	0	0	0	0	0	0	2280000	1750000	2510000	3380000
P58774	Tropomyosin beta chain	Tpm2	R.LATALQKLEEAEKAADESERGM(+15.99)KV.I	106	129	Oxidation (M)	14400000	0	0	0	0	0	0	0	0	0	0	0	0	0
P58774	Tropomyosin beta chain	Tpm2	Q.KLEEAEKAADESERGMKVI.E	112	130		3570000	0	0	0	0	0	0	0	0	0	0	0	0	0
P58774	Tropomyosin beta chain	Tpm2	D.EEKMELQEMQLKEAK.H	138	152		1130000	4470000	0	0	0	4970000	0	984000	0	0	0	0	0	0
P58774	Tropomyosin beta chain	Tpm2	R.AMKDEEKMELQEM(+15.99)QLKEA.K	134	151	Oxidation (M)	844000	3980000	0	5290000	3290000	0	0	7760000	2670000	1400000	0	0	0	0
P58774	Tropomyosin beta chain	Tpm2	E.DEVEKYSESVKDAQEK.L	55	70		0	0	0	0	0	0	2640000	0	0	0	3710000	2910000	2430000	16000000
P58774	Tropomyosin beta chain	Tpm2	I.AEDSDRKYEEVARKLVI.L	155	171		4240000	0	0	0	0	0	0	0	0	0	0	0	0	0
P58774	Tropomyosin beta chain	Tpm2	A.DKYSTKEDKYEEEI.K	212	225		0	0	0	0	7280000	2930000	5820000	0	0	0	0	0	1540000	0
P58774	Tropomyosin beta chain	Tpm2	K.GTEDEVEKYSESVKDA.Q	52	67		2740000	5180000	4730000	8280000	10500000	12400000	12900000	4190000	7140000	6580000	8510000	10600000	9390000	10100000
P58774	Tropomyosin beta chain	Tpm2	Q.LVEEELDRA.Q	94	102		6850000	17700000	21300000	18500000	18300000	19400000	15100000	0	0	0	0	0	0	0
P58774	Tropomyosin beta chain	Tpm2	K.DEEKMELQEMQLKEAK.H	137	152		20200000	28300000	29900000	33300000	26600000	27200000	22600000	18200000	15500000	11200000	6230000	3510000	2960000	11900000
P58774	Tropomyosin beta chain	Tpm2	I.KLLEEKLKEAETRA.E	226	239		6390000	0	0	0	0	1270000	0	0	0	0	0	0	0	0
P58774	Tropomyosin beta chain	Tpm2	N.RAMKDEEKMELQEMQLKEA.K	133	151		2970000	0	0	0	0	0	0	3430000	0	0	0	0	0	0
P58774	Tropomyosin beta chain	Tpm2	K.DEEKM(+15.99)ELQEM.Q	137	146	Oxidation (M)	0	0	0	0	0	0	0	0	0	383000	1390000	1880000	3200000	2190000
P58774	Tropomyosin beta chain	Tpm2	K.TIDDLEDEVYAQKMKYK.A	252	268		77900000	31800000	16500000	6030000	0	0	0	0	0	0	0	0	0	0
P58774	Tropomyosin beta chain	Tpm2	I.ENRAMKDEEKMELQEMQLK.E	131	149		4500000	0	0	0	454000	0	0	0	0	0	0	0	0	0
P58774	Tropomyosin beta chain	Tpm2	K.LKGTEDEVEKYSESVKDAQEKLEQAEKKAT.D	50	79		0	1950000	0	2460000	1360000	2860000	0	0	0	0	0	0	0	0
P58774	Tropomyosin beta chain	Tpm2	A.EADKKQAEDRC(+57.02)KQLEEEQQALQKK.L	26	49	Carbamidomethylation	9640000	10200000	13300000	25400000	20600000	23800000	28700000	10500000	6630000	5440000	2670000	0	0	0
P58774	Tropomyosin beta chain	Tpm2	E.SVKDAQEKLEQAEK.K	63	76		0	0	0	0	2990000	0	0	0	0	0	4670000	0	0	902000
P58774	Tropomyosin beta chain	Tpm2	K.LKGTEDEVEKYSE.S	50	62		0	1800000	0	0	0	0	0	0	0	0	2370000	0	0	4380000
P58774	Tropomyosin beta chain	Tpm2	K.YSESVKDAQEKLEQAEKKATDAEADVA.S	60	86		12000000	20600000	23300000	10100000	10200000	777000	4070000	11200000	9730000	10500000	4400000	0	0	0
P58774	Tropomyosin beta chain	Tpm2	V.EEELDRAQERLATALQKLEEAEKAADESERGMKVI.E	96	130		3680000	0	0	0	0	0	0	0	0	0	0	0	0	0
P58774	Tropomyosin beta chain	Tpm2	E.SVKDAQEKLEQAEKKA.T	63	78		0	0	3250000	0	0	0	2890000	0	0	0	0	0	0	0
P58774	Tropomyosin beta chain	Tpm2	E.DEVEKYSESVKDA.Q	55	67		0	0	0	0	0	653000	2410000	0	0	440000	660000	1500000	703000	1530000
P58774	Tropomyosin beta chain	Tpm2	K.GTEDEVEKYSESVKDAQEKLEQAEKKATDA.E	52	81		1040000	9030000	10100000	10600000	9140000	11500000	12800000	2820000	0	0	0	0	0	0
P58774	Tropomyosin beta chain	Tpm2	V.ILEGELERSEERAEVAES.K	171	188		4780000	0	0	0	0	0	0	0	0	0	0	0	0	0
P58774	Tropomyosin beta chain	Tpm2	A.TALQKLEEAEKAADESERGM(+15.99)KVI.E	108	130	Oxidation (M)	36800000	14600000	9640000	4450000	0	0	0	0	0	0	0	0	0	0
P58774	Tropomyosin beta chain	Tpm2	T.ALQKLEEAEKAADESERGMK.V	109	128		0	4680000	0	0	0	0	0	0	0	0	0	0	0	0
P58774	Tropomyosin beta chain	Tpm2	A.TALQKLEEAEKAADESERGM.K	108	127		0	0	0	3710000	0	0	0	0	0	0	0	0	0	0
P58774	Tropomyosin beta chain	Tpm2	R.KLVILEGELERS.E	168	179		3680000	0	0	0	1100000	4540000	607000	0	0	0	0	0	0	0
P58774	Tropomyosin beta chain	Tpm2	K.LDKENAIDRAEQAEADKKQAEDRC(+57.02)KQLEEEQQALQK.K	13	48	Carbamidomethylation	0	0	779000	0	0	0	0	6340000	0	0	0	0	0	0
P58774	Tropomyosin beta chain	Tpm2	R.LATALQKLEEAEKAAD.E	106	121		7570000	0	0	0	0	0	0	0	0	0	0	0	0	0
P58774	Tropomyosin beta chain	Tpm2	I.KLLEEKLKEAETRAEFA.E	226	242		1620000	2040000	0	0	0	0	0	1280000	0	0	0	0	0	0
P58774	Tropomyosin beta chain	Tpm2	D.KYEEEIKLLEEKLK.E	220	233		3470000	929000	1300000	0	0	0	0	0	0	0	0	0	0	0
P58774	Tropomyosin beta chain	Tpm2	Y.SESVKDAQEKLEQAEKK.A	61	77		0	0	0	0	0	1620000	2450000	0	0	0	0	539000	1430000	2910000
P58774	Tropomyosin beta chain	Tpm2	A.LQKLEEAEKAADESERGMK.V	110	128		28100000	17300000	18600000	1100000	2630000	3410000	0	34200000	5460000	3770000	0	0	0	0
P58774	Tropomyosin beta chain	Tpm2	D.AQEKLEQAEKKATDAEADVA.S	67	86		25600000	16700000	8290000	13600000	6760000	4380000	6320000	21400000	5680000	3870000	0	0	0	0
P58774	Tropomyosin beta chain	Tpm2	R.LATALQKLEEAEKAADESER.G	106	125		46300000	8700000	8880000	4350000	4350000	1910000	0	28500000	5150000	0	0	0	0	0
P58774	Tropomyosin beta chain	Tpm2	K.LVILEGELERSEERAEVA.E	169	186		151000000	141000000	146000000	101000000	75200000	32200000	9880000	138000000	110000000	79500000	37500000	12300000	2020000	2920000
P58774	Tropomyosin beta chain	Tpm2	T.ALQKLEEAEKAADESERGMKVI.E	109	130		6370000	0	1290000	0	0	0	0	0	1330000	0	0	0	0	0
P58774	Tropomyosin beta chain	Tpm2	R.AMKDEEKM(+15.99)ELQEM.Q	134	146		0	0	0	1300000	6240000	5270000	4060000	0	0	4810000	6530000	6510000	9620000	7830000
P58774	Tropomyosin beta chain	Tpm2	G.TEDEVEKYSESVKDAQEKLEQAEKKA.T	53	78		0	662000	0	1860000	2310000	1370000	0	0	0	0	0	0	0	0
P58774	Tropomyosin beta chain	Tpm2	A.EQAEADKKQAEDRC(+57.02)KQLEEEQQALQK.K	23	48		0	2120000	2710000	2470000	5360000	3450000	4220000	2240000	0	0	0	0	0	0
P58774	Tropomyosin beta chain	Tpm2	A.TALQKLEEAEKAADESER.G	108	125		31200000	23200000	20900000	17600000	17200000	16400000	17100000	54900000	44600000	32000000	21800000	19800000	23000000	4940000
P58774	Tropomyosin beta chain	Tpm2	R.SEERAEVAESKC(+57.02)GDLEEEL.K	179	197		0	0	0	1240000	1620000	1760000	1120000	0	0	0	0	0	0	0
P58774	Tropomyosin beta chain	Tpm2	I.SEELDNALNDITSL	271	284		10000000	11100000	12100000	12300000	9360000	24200000	16600000	17000000	20000000	7530000	16100000	4100000	10500000	7380000
P58774	Tropomyosin beta chain	Tpm2	A.TALQKLEEAE.K	108	117		0	0	0	0	0	795000	2040000	0	0	0	445000	2310000	0	0
P58774	Tropomyosin beta chain	Tpm2	V.KDAQEKLEQAEKKATDAEA.D	65	83		0	0	0	0	1460000	1910000	2210000	0	0	0	0	0	0	0
P58774	Tropomyosin beta chain	Tpm2	A.LQKLEEAEKAADESER.G	110	125		5840000	0	0	0	0	0	0	7550000	1190000	5510000	0	0	0	0
P58774	Tropomyosin beta chain	Tpm2	L.EEKLKEAETRAEFAERSV.A	229	246		3070000	0	0	0	0	0	0	0	0	0	0	0	0	0
P58774	Tropomyosin beta chain	Tpm2	K.KMQMLKLDK.E	7	15		3540000	0	0	0	0	0	0	0	0	0	0	0	0	0
P58774	Tropomyosin beta chain	Tpm2	K.LLEEKLKEAET.R	227	237		0	1140000	864000	1470000	0	0	0	0	995000	0	0	0	0	0
P58774	Tropomyosin beta chain	Tpm2	A.EQAEADKKQAEDRC(+57.02)KQLEEEQQALQKK.L	23	49	Carbamidomethylation	0	0	0	1710000	1290000	2300000	0	0	0	0	0	0	0	0
P58774	Tropomyosin beta chain	Tpm2	K.LKGTEDEVEKYSESVKDAQEKLEQAEKKATDAEA.D	50	83		0	2150000	1360000	0	0	1030000	0	0	0	0	0	0	0	0
P58774	Tropomyosin beta chain	Tpm2	V.EEELDRAQERLATALQKLEEAEKA.A	96	119		307000000	74000000	36500000	2430000	1130000	0	0	29000000	0	0	0	0	0	0
P58774	Tropomyosin beta chain	Tpm2	L.QKLEEAEKAA.D	111	120		0	0	0	4480000	631000	0	0	0	0	0	0	0	0	0
P58774	Tropomyosin beta chain	Tpm2	E.EEIKLLEEKLKEAETRAEFAER.S	223	244		2270000	0	0	0	0	0	0	0	0	0	0	0	0	0
P58774	Tropomyosin beta chain	Tpm2	Y.STKEDKYEEEIKLLEEKLKEA.E	215	235		0	0	0	0	0	0	0	2690000	0	0	0	0	0	0
P58774	Tropomyosin beta chain	Tpm2	K.LKGTEDEVEKYSESVKDAQEKLEQAEKKATD.A	50	80		1610000	0	0	0	0	0	0	0	0	0	0	0	0	0
P58774	Tropomyosin beta chain	Tpm2	L.EGELERSEERA.E	173	183		3320000	3750000	4180000	2740000	16000000	9740000	8580000	3900000	34100000	4840000	2290000	3670000	0	0
P58774	Tropomyosin beta chain	Tpm2	R.AEQAEADKKQAEDRC(+57.02)KQLEEEQQALQK.K	22	48	Carbamidomethylation	0	8840000	6080000	5780000	0	0	1470000	7180000	5450000	2170000	0	0	0	0
P58774	Tropomyosin beta chain	Tpm2	N.RRIQLVEEELDRAQER.L	90	105		3570000	0	0	0	0	0	0	0	0	0	0	0	0	0
P58774	Tropomyosin beta chain	Tpm2	K.KLKGTEDEVEKYSESVKDAQEKLEQAEKKATDAEA.D	49	83		0	0	2220000	1020000	1480000	0	0	0	0	0	0	0	0	0
P58774	Tropomyosin beta chain	Tpm2	K.EAETRAEFAERSVAKLEK.T	234	251		17800000	4500000	4530000	0	0	0	0	0	0	0	0	0	0	0
P58774	Tropomyosin beta chain	Tpm2	K.GTEDEVEKYSESVKDAQEKLE.Q	52	72		0	0	2290000	1430000	0	0	0	4330000	0	2760000	3540000	1810000	0	0
P58774	Tropomyosin beta chain	Tpm2	K.HIAEDSDRKYEEVARK.L	153	168		457000000	481000000	352000000	282000000	269000000	267000000	195000000	23700000	14600000	8440000	0	0	0	5980000
P58774	Tropomyosin beta chain	Tpm2	V.EEELDRAQERLATA.L	96	109		2220000	0	0	0	0	0	0	0	0	0	0	0	0	0
P58774	Tropomyosin beta chain	Tpm2	A.EADKKQAEDRC(+57.02)KQLEEEQQALQK.K	26	48	Carbamidomethylation	3300000	7030000	7540000	12500000	12500000	10900000	12000000	9690000	6610000	0	0	0	0	0
P58774	Tropomyosin beta chain	Tpm2	R.RIQLVEEELDRA.Q	91	102		7590000	2050000	1410000	0	0	0	0	3770000	0	0	0	0	0	0
P58774	Tropomyosin beta chain	Tpm2	R.AMKDEEKM(+15.99)ELQEMQLKEA.K	134	151	Oxidation (M)	0	0	0	0	0	0	0	1820000	0	0	0	0	0	0
P58774	Tropomyosin beta chain	Tpm2	K.GTEDEVEKYSESVKDAQEKLEQ.A	52	73		0	1470000	0	734000	1760000	0	0	1130000	2280000	1070000	2260000	933000	0	0
P58774	Tropomyosin beta chain	Tpm2	T.KEDKYEEEIKLLEEKLKEAET.R	217	237		0	0	0	0	0	0	0	1920000	0	0	0	0	0	0
P58774	Tropomyosin beta chain	Tpm2	M.KDEEKMELQEM.Q	136	146		0	0	0	0	0	905000	1550000	0	0	0	0	0	864000	806000
P58774	Tropomyosin beta chain	Tpm2	C.GDLEEELKIV.T	191	200		245000000	245000000	270000000	327000000	386000000	381000000	373000000	199000000	246000000	278000000	274000000	273000000	250000000	231000000
P58774	Tropomyosin beta chain	Tpm2	K.LLEEKLKEA.E	227	235		0	0	0	0	831000	1590000	1500000	0	0	0	0	0	0	0
P58774	Tropomyosin beta chain	Tpm2	E.DEVEKYSESVKDAQEKLEQAEKKAT.D	55	79		0	0	0	0	0	2280000	1650000	0	0	0	0	0	0	0
P58774	Tropomyosin beta chain	Tpm2	K.MELQEM(+15.99)QLKEAK.H	141	152	Oxidation (M)	0	1440000	0	0	1010000	0	0	1460000	0	0	0	0	0	0
P58774	Tropomyosin beta chain	Tpm2	K.C(+57.02)GDLEEELKI.V	190	199	Carbamidomethylation	0	0	0	0	0	0	0	0	0	0	0	1400000	0	2500000
P58774	Tropomyosin beta chain	Tpm2	A.TDAEADVASLNRR.I	79	91		0	8230000	8530000	10300000	10700000	10200000	19300000	5130000	11000000	10400000	7670000	7720000	32300000	3640000
P58774	Tropomyosin beta chain	Tpm2	K.GTEDEVEKY.S	52	60		5280000	7250000	10300000	11700000	12900000	8780000	19800000	6310000	6450000	12200000	20300000	30000000	31100000	30100000
P58774	Tropomyosin beta chain	Tpm2	N.RAM(+15.99)KDEEKMELQEMQLK.E	133	149	Oxidation (M)	0	0	0	0	0	0	0	3480000	0	0	0	0	0	0
P58774	Tropomyosin beta chain	Tpm2	E.DEVEKYSESVKDAQEKLEQAEKKATDAEA.D	55	83		0	0	0	0	0	1900000	1550000	0	0	0	0	0	0	0
P58774	Tropomyosin beta chain	Tpm2	I.LEGELERSEERAEVAESKC(+57.02).G	172	190	Carbamidomethylation	726000	0	0	0	0	0	0	0	0	0	0	0	0	0
P58774	Tropomyosin beta chain	Tpm2	R.AM(+15.99)KDEEKMELQEM(+15.99)QLKEAK.H	134	152	Oxidation (M)	0	0	0	0	0	0	0	0	0	0	0	0	0	0
P58774	Tropomyosin beta chain	Tpm2	I.SEELDNALNDI.T	271	281		14300000	18100000	16100000	17800000	15200000	12700000	11600000	10200000	12300000	9120000	8810000	12300000	12000000	13600000
P58774	Tropomyosin beta chain	Tpm2	L.ATALQKLEEAEK.A	107	118		0	0	3180000	0	0	0	0	0	0	0	0	0	0	0
P58774	Tropomyosin beta chain	Tpm2	K.LKGTEDEVEKYSESVKDA.Q	50	67		2430000	2210000	2840000	3530000	7300000	4110000	0	3030000	4790000	2510000	3500000	0	0	0
P58774	Tropomyosin beta chain	Tpm2	A.SLNRRIQLV.E	87	95		0	437000	0	0	0	0	0	891000	0	572000	592000	489000	0	0
P58774	Tropomyosin beta chain	Tpm2	A.TALQKLEEAEKAADESERGMKVI.E	108	130		50900000	111000000	71000000	32500000	10800000	1710000	5160000	65200000	5800000	0	0	0	0	0
P58774	Tropomyosin beta chain	Tpm2	G.TEDEVEKYSESVKDAQEKLEQAEK.K	53	76		0	0	0	0	0	0	0	0	0	0	0	1630000	1050000	0
P58774	Tropomyosin beta chain	Tpm2	V.KDAQEKLEQAEKKATD.A	65	80		0	0	0	0	0	2640000	0	0	0	0	0	0	0	0
P58774	Tropomyosin beta chain	Tpm2	R.AM(+15.99)KDEEKM(+15.99)ELQEMQLK.E	134	149	Oxidation (M)	0	0	2610000	0	0	0	0	0	0	0	0	0	0	0
P58774	Tropomyosin beta chain	Tpm2	K.GTEDEVEKYS.E	52	61		0	1910000	1670000	3200000	4380000	6940000	9300000	1840000	4110000	5870000	10100000	13800000	16700000	25400000
P58774	Tropomyosin beta chain	Tpm2	R.RIQLVEEELDRAQERLA.T	91	107		7270000	0	0	0	0	0	0	0	0	0	0	0	0	0
P58774	Tropomyosin beta chain	Tpm2	I.DDLEDEVYAQK.M	254	264		33900000	43100000	50400000	59700000	46600000	58800000	56900000	71000000	94100000	115000000	88600000	126000000	129000000	121000000
P58774	Tropomyosin beta chain	Tpm2	E.DEVEKYSESVKDAQEKLEQAEKK.A	55	77		0	2030000	5600000	7730000	11700000	15200000	29600000	0	9910000	9500000	21400000	21600000	17400000	21100000
P58774	Tropomyosin beta chain	Tpm2	K.TIDDLEDEVYA.Q	252	262		0	0	0	0	0	0	0	0	0	0	1040000	0	844000	3610000
P58774	Tropomyosin beta chain	Tpm2	A.EADKKQAEDRC(+57.02)KQLEEEQQA.L	26	45	Carbamidomethylation	0	0	0	0	0	1040000	1280000	0	0	0	0	0	0	0
P58774	Tropomyosin beta chain	Tpm2	R.SVAKLEKTIDDLEDEVYAQKM(+15.99)K.Y	245	266	Oxidation (M)	2290000	0	0	0	0	0	0	0	0	0	0	0	0	0
P58774	Tropomyosin beta chain	Tpm2	K.SLEAQADKYSTKEDKYEEEIKLLEEKLK.E	206	233		32900000	28400000	33900000	14900000	2160000	0	0	46300000	24200000	7200000	0	0	0	0
P58774	Tropomyosin beta chain	Tpm2	S.ESVKDAQEKLEQAEK.K	62	76		0	0	0	0	0	1370000	0	2010000	0	4620000	3360000	6860000	15900000	10900000
P58774	Tropomyosin beta chain	Tpm2	R.SVAKLEKTIDDLEDEVYAQK.M	245	264		2230000	0	0	0	0	0	0	0	0	0	0	0	0	0
P58774	Tropomyosin beta chain	Tpm2	K.SLEAQADKYSTKEDKYEEEIKLL.E	206	228		30700000	22500000	19900000	9760000	1680000	0	0	10200000	5970000	3920000	0	0	0	0
P58774	Tropomyosin beta chain	Tpm2	D.LEEELKIV.T	193	200		22900000	25900000	23900000	26500000	27600000	24300000	25100000	29500000	32000000	30800000	29000000	26800000	22300000	15400000
P58774	Tropomyosin beta chain	Tpm2	K.GTEDEVEKYSESVKDAQEKLEQAEKKATDAEAD.V	52	84		449000	665000	0	0	0	0	0	1020000	0	0	0	0	0	0
P58774	Tropomyosin beta chain	Tpm2	R.AEVAESKC(+57.02)GDLEEEL.K	183	197	Carbamidomethylation	0	0	0	0	0	0	1560000	0	0	0	0	557000	0	0
P58774	Tropomyosin beta chain	Tpm2	D.KYEEEIKLLEEKLKEAETRAEFAER.S	220	244		0	0	0	0	0	0	0	0	0	0	0	0	0	0
P58774	Tropomyosin beta chain	Tpm2	R.IQLVEEELDRAQERLAT.A	92	108		2080000	0	0	0	0	0	0	0	0	0	0	0	0	0
P58774	Tropomyosin beta chain	Tpm2	K.KLKGTEDEVEKYSESVKDAQEKLEQAEKKATD.A	49	80		0	0	0	0	0	0	0	0	0	0	0	0	0	0
P58774	Tropomyosin beta chain	Tpm2	N.AIDRAEQAEADKKQAEDR.C	18	35		3980000	9040000	13200000	9940000	8370000	7650000	0	2880000	4070000	959000	8160000	1380000	0	0
P58774	Tropomyosin beta chain	Tpm2	Q.ERLATALQKLEEAEKAA.D	104	120		1200000	0	0	0	0	0	0	0	0	0	0	0	0	0
P58774	Tropomyosin beta chain	Tpm2	N.AIDRAEQAEADKKQAEDRC(+57.02)K.Q	18	37	Carbamidomethylation	0	1920000	0	49700000	0	0	0	0	0	0	2640000	0	0	0
P58774	Tropomyosin beta chain	Tpm2	D.KYEEEIKLLEEKLKEAETR.A	220	238		0	0	0	0	0	0	0	0	0	0	0	0	0	0
P58774	Tropomyosin beta chain	Tpm2	V.EEELDRAQERLATALQKLEEAEKAADESERGM(+15.99)K.V	96	128	Oxidation (M)	3040000	0	0	0	0	0	0	0	0	0	0	0	0	0
P58774	Tropomyosin beta chain	Tpm2	V.EEELDRAQERLATALQK.L	96	112		8480000	1390000	0	0	0	0	0	0	0	422000	0	0	0	0
P58774	Tropomyosin beta chain	Tpm2	K.VIENRAMKDEEKMELQEMQLK.E	129	149		970000	0	0	0	0	0	0	0	0	0	0	0	0	0
P58774	Tropomyosin beta chain	Tpm2	E.DEVEKYSESVKDAQEKLEQAEKKATDAEADVA.S	55	86		3310000	1470000	13800000	13300000	18200000	12700000	3930000	17000000	12300000	13300000	4620000	0	0	0
P58774	Tropomyosin beta chain	Tpm2	I.KLLEEKLKEAETRAEFAERSV.A	226	246		0	0	0	0	0	0	0	0	0	0	0	0	0	0
P58774	Tropomyosin beta chain	Tpm2	K.GTEDEVEKYSESVKDAQEKLEQAEKKATDAEADVASLNR.R	52	90		0	0	0	0	0	0	0	0	0	0	0	0	0	0
P58774	Tropomyosin beta chain	Tpm2	E.EELDRAQERL.A	97	106		3480000	1220000	4310000	10100000	1120000	0	11400000	4570000	4790000	0	1660000	0	1600000	0
P58774	Tropomyosin beta chain	Tpm2	S.ESVKDAQEKLEQA.E	62	74		0	0	0	0	0	0	0	0	0	0	0	0	872000	728000
P58774	Tropomyosin beta chain	Tpm2	K.EDKYEEEIKLLEEKLKEAETRA.E	218	239		0	0	0	0	0	0	0	0	0	0	0	0	0	0
P58774	Tropomyosin beta chain	Tpm2	R.LATALQKLEEAEK.A	106	118		83900000	84700000	84400000	63200000	48600000	14400000	22400000	44600000	17200000	4940000	762000	0	737000	1060000
P58774	Tropomyosin beta chain	Tpm2	T.KEDKYEEEIKLLEEKLKEA.E	217	235		0	4260000	0	0	0	0	0	1420000	0	0	0	0	0	0
P58774	Tropomyosin beta chain	Tpm2	K.GTEDEVEKYSE.S	52	62		1170000	1710000	2110000	2160000	2010000	1340000	2190000	2340000	2800000	2640000	3720000	2810000	3060000	4460000
P58774	Tropomyosin beta chain	Tpm2	R.IQLVEEELDRAQERLATA.L	92	109		1300000	0	0	0	0	0	0	0	0	0	0	0	0	0
P58774	Tropomyosin beta chain	Tpm2	A.TALQKLEEAEKAADESERGMKV.I	108	129		93700000	43200000	41500000	22000000	0	2190000	0	49500000	7420000	0	0	0	0	0
P58774	Tropomyosin beta chain	Tpm2	K.DEEKMELQEM(+15.99).Q	137	146	Oxidation (M)	0	0	0	0	0	0	0	0	0	0	0	0	1240000	0
P58774	Tropomyosin beta chain	Tpm2	R.SVAKLEKTIDDLEDEVYAQKMK.Y	245	266		14500000	0	0	0	0	0	0	0	0	0	0	0	0	0
P58774	Tropomyosin beta chain	Tpm2	I.AEDSDRKYEEVARKLV.I	155	170		1440000	0	0	0	0	0	0	0	0	0	0	0	0	0
P58774	Tropomyosin beta chain	Tpm2	T.EDEVEKYSESVKDAQEKLEQAEK.K	54	76		0	1220000	0	0	2030000	4290000	1090000	0	0	5660000	2330000	3190000	6030000	2660000
P58774	Tropomyosin beta chain	Tpm2	T.KEDKYEEEIKLLEEKLK.E	217	233		0	0	0	314000	0	0	0	2970000	0	0	0	0	0	0
P58774	Tropomyosin beta chain	Tpm2	I.DDLEDEVYAQKM.K	254	265		6740000	3670000	6260000	2250000	6190000	5260000	4850000	2510000	3980000	2260000	5250000	3450000	1400000	1040000
P58774	Tropomyosin beta chain	Tpm2	I.DDLEDEVYA.Q	254	262		0	0	0	0	0	0	0	0	0	0	519000	0	520000	0
P58774	Tropomyosin beta chain	Tpm2	E.VEKYSESVKDAQEKLEQAEKKATDAEADVA.S	57	86		1030000	0	0	0	0	0	0	0	0	0	0	0	0	0
P58774	Tropomyosin beta chain	Tpm2	K.KLKGTEDEVEKYSESVKDAQEKLEQAEKKAT.D	49	79		0	0	0	0	0	934000	0	0	0	0	0	0	0	0
P58774	Tropomyosin beta chain	Tpm2	E.DEVEKYSESVKDAQEKLEQAEK.K	55	76		10900000	8670000	13300000	32400000	41600000	66900000	83200000	6140000	20800000	39900000	31100000	58000000	95400000	96500000
P58774	Tropomyosin beta chain	Tpm2	Q.LEEEQQALQKKLK.G	39	51		0	0	0	0	0	0	0	0	0	0	0	0	0	0
P58774	Tropomyosin beta chain	Tpm2	R.AEVAESKC(+57.02)GDLEEELKI.V	183	199	Carbamidomethylation	0	0	0	0	0	0	0	0	0	809000	0	0	0	0
P58774	Tropomyosin beta chain	Tpm2	K.LKGTEDEVEKYSESVKDAQEK.L	50	70		0	0	0	0	0	0	0	0	0	0	806000	0	0	0
P58774	Tropomyosin beta chain	Tpm2	T.EDEVEKYSESV.K	54	64		0	0	0	957000	0	1720000	5300000	0	0	0	0	1120000	2280000	3480000
P58774	Tropomyosin beta chain	Tpm2	Q.MLKLDKEN.A	10	17		0	0	0	3700000	5210000	0	0	0	0	0	0	0	0	0
P58774	Tropomyosin beta chain	Tpm2	R.AQERLATALQKLEEAEKA.A	102	119		0	0	0	0	0	0	0	0	0	0	0	0	0	0
P58774	Tropomyosin beta chain	Tpm2	K.EDKYEEEI.K	218	225		7070000	24100000	28700000	45800000	49500000	45400000	43100000	18400000	44500000	71500000	98600000	116000000	125000000	137000000
P58774	Tropomyosin beta chain	Tpm2	A.ADESERGM(+15.99)KVI.E	120	130		59000000	4950000	349000000	5620000	1770000	4120000	348000000	0	0	0	0	0	1540000	0
P58774	Tropomyosin beta chain	Tpm2	A.DESERGMKV.I	121	129		153000000	263000000	280000000	227000000	271000000	263000000	220000000	219000000	169000000	148000000	81100000	126000000	40800000	29300000
P58774	Tropomyosin beta chain	Tpm2	A.ADESERGMKV.I	120	129		125000000	192000000	138000000	172000000	262000000	250000000	218000000	255000000	145000000	57500000	35600000	42900000	2060000	283000000
P58774	Tropomyosin beta chain	Tpm2	A.DESERGM(+15.99)KVI.E	121	130		8520000	8590000	4070000	4950000	25000000	5250000	40400000	5420000	9210000	24400000	33600000	42300000	79100000	0
P58774	Tropomyosin beta chain	Tpm2	A.DESERGMKVI.E	121	130		153000000	135000000	109000000	83800000	72900000	66600000	45800000	43900000	7000000	4230000	0	0	0	0
P58774	Tropomyosin beta chain	Tpm2	A.ADESERGMKVI.E	120	130		125000000	108000000	67000000	46800000	47500000	34200000	29100000	27600000	0	6690000	8800000	7770000	0	0
P58774	Tropomyosin beta chain	Tpm2	A.ETRAEFA.E	236	242		13200000	10100000	14100000	10100000	22800000	0	13400000	0	0	16700000	0	0	0	0
P58774	Tropomyosin beta chain	Tpm2	K.AADESERGMKVI.E	119	130		26100000	24200000	21700000	19400000	15200000	7630000	10500000	0	7060000	861000	1780000	4710000	1150000	999000
P58774	Tropomyosin beta chain	Tpm2	K.EAETRAEFA.E	234	242		6600000	8800000	11600000	0	0	0	15600000	11500000	6580000	0	0	0	0	0
P58774	Tropomyosin beta chain	Tpm2	R.GMKVIENR.A	126	133		16500000	0	0	0	0	0	0	0	0	0	0	0	0	0
P58774	Tropomyosin beta chain	Tpm2	K.AADESERGMKV.I	119	129		12200000	22700000	20000000	26300000	17800000	14700000	11600000	8520000	0	175000	0	879000	4230000	7090000
P58774	Tropomyosin beta chain	Tpm2	K.EAETRAEF.A	234	241		0	0	2110000	0	0	2570000	0	0	0	0	0	0	0	0
P58774	Tropomyosin beta chain	Tpm2	E.AEKAADESERGMKV.I	116	129		13700000	14600000	5600000	6470000	6540000	1250000	4880000	5050000	1850000	0	0	0	0	0
P58774	Tropomyosin beta chain	Tpm2	K.EDKYEEEIK.L	218	226		0	0	0	0	0	0	0	0	0	0	1700000	2210000	1410000	2780000
P58774	Tropomyosin beta chain	Tpm2	K.C(+57.02)GDLEEEL.K	190	197	Carbamidomethylation	0	0	0	0	0	0	0	0	0	0	0	0	0	545000
P21107	Tropomyosin alpha-3 chain	Tpm3	K.KAADAEAEVA.S	78	87		55300000	126000000	106000000	94000000	165000000	159000000	126000000	64100000	83000000	149000000	121000000	125000000	83700000	189000000
P21107	Tropomyosin alpha-3 chain	Tpm3	I.KILTDKLK.E	227	234		16900000	45700000	54200000	69400000	85900000	92100000	103000000	64500000	123000000	161000000	187000000	105000000	125000000	100000000
P21107	Tropomyosin alpha-3 chain	Tpm3	M.EAIKKK.M	3	8		72800000	95100000	102000000	70700000	86700000	84500000	67300000	105000000	104000000	140000000	93400000	64200000	48500000	46100000
P21107	Tropomyosin alpha-3 chain	Tpm3	I.AEEADRKYEEVARK.L	156	169		200000000	201000000	299000000	152000000	111000000	155000000	47800000	187000000	62300000	57200000	0	28700000	30700000	0
P21107	Tropomyosin alpha-3 chain	Tpm3	K.SLEAQAEKYSQKEDKYEEEI.K	207	226		49800000	123000000	115000000	170000000	175000000	210000000	194000000	126000000	224000000	216000000	185000000	146000000	92800000	40600000
P21107	Tropomyosin alpha-3 chain	Tpm3	I.IEGDLER.T	173	179		8680000	130000000	67500000	13300000	55200000	31400000	39300000	18500000	29900000	35600000	52100000	67400000	64400000	72300000
P21107	Tropomyosin alpha-3 chain	Tpm3	I.IEGDLERT.E	173	180		10400000	18300000	21900000	23600000	35600000	46100000	62500000	18400000	37300000	36000000	58500000	54600000	72600000	59100000
P21107	Tropomyosin alpha-3 chain	Tpm3	R.KLVIIEGDLERT.E	169	180		66400000	105000000	97800000	108000000	146000000	128000000	117000000	65800000	82300000	78100000	53500000	25100000	13100000	13300000
P21107	Tropomyosin alpha-3 chain	Tpm3	I.AEEADRKYEEVAR.K	156	168		235000000	183000000	195000000	155000000	99400000	73000000	49600000	192000000	133000000	96600000	34000000	27400000	10500000	0
P21107	Tropomyosin alpha-3 chain	Tpm3	R.ALKDEEKM.E	135	142		0	0	0	84300000	111000000	94700000	110000000	0	0	0	0	0	0	0
P21107	Tropomyosin alpha-3 chain	Tpm3	K.YSQKEDKYEEEI.K	215	226		8930000	29300000	41900000	49900000	19100000	62100000	61100000	25700000	59400000	100000000	134000000	147000000	154000000	151000000
P21107	Tropomyosin alpha-3 chain	Tpm3	N.LKSLEAQAEK.Y	205	214		20200000	33400000	46700000	36000000	35800000	37800000	36200000	51600000	69300000	60700000	74800000	86900000	65000000	51700000
P21107	Tropomyosin alpha-3 chain	Tpm3	A.EKKAADAEAEVA.S	76	87		80300000	129000000	141000000	143000000	141000000	175000000	154000000	109000000	106000000	0	0	0	0	0
P21107	Tropomyosin alpha-3 chain	Tpm3	D.KYSEALKDAQEKL.E	60	72		0	0	1810000	6110000	12900000	17300000	35700000	3590000	11700000	60800000	43600000	55100000	71900000	105000000
P21107	Tropomyosin alpha-3 chain	Tpm3	T.EERAELAESKC(+57.02).S	181	191	Carbamidomethylation	42400000	0	36100000	27100000	0	0	40100000	0	0	0	0	0	0	0
P21107	Tropomyosin alpha-3 chain	Tpm3	M.MEAIKKK.M	2	8		23100000	17700000	16200000	11500000	70200000	14300000	12900000	18900000	0	26400000	0	12700000	0	0
P21107	Tropomyosin alpha-3 chain	Tpm3	K.HIAEEADRKYEEV.A	154	166		19200000	29600000	20100000	33500000	38800000	38600000	35500000	16800000	21500000	23500000	25000000	16600000	12100000	10700000
P21107	Tropomyosin alpha-3 chain	Tpm3	I.AEEADRKYEEV.A	156	166		18500000	21200000	17400000	37500000	38000000	41700000	47500000	22900000	38300000	34700000	40300000	44400000	40800000	38000000
P21107	Tropomyosin alpha-3 chain	Tpm3	A.EEADRKYEEVA.R	157	167		6890000	9520000	14100000	9520000	43700000	17100000	39000000	12600000	20900000	32900000	29600000	48200000	29900000	28200000
P21107	Tropomyosin alpha-3 chain	Tpm3	K.KLKGTEDELDKYSEALKDAQEKLELA.E	50	75		57500000	145000000	185000000	210000000	228000000	233000000	179000000	101000000	127000000	74600000	59500000	8490000	951000	0
P21107	Tropomyosin alpha-3 chain	Tpm3	K.YSQKEDKYEEEIKILTDKLK.E	215	234		10900000	21500000	23400000	17300000	11300000	13000000	8340000	22800000	41200000	58600000	31000000	10000000	2170000	0
P21107	Tropomyosin alpha-3 chain	Tpm3	A.LKDAQEKL.E	65	72		0	0	0	11800000	13500000	0	26700000	0	0	1590000	29700000	39600000	14400000	45200000
P21107	Tropomyosin alpha-3 chain	Tpm3	K.TIDDLEDELYAQK.L	253	265		3850000	6140000	7280000	10800000	12300000	15800000	6670000	10700000	25400000	37300000	42500000	60300000	56200000	59700000
P21107	Tropomyosin alpha-3 chain	Tpm3	D.DLEDELYAQKLK.Y	256	267		259000000	309000000	334000000	320000000	346000000	351000000	371000000	341000000	313000000	330000000	319000000	307000000	258000000	178000000
P21107	Tropomyosin alpha-3 chain	Tpm3	K.HIAEEADRKYEEVAR.K	154	168		70500000	58200000	53400000	25900000	21900000	12300000	9900000	42300000	16200000	18400000	15000000	9630000	8050000	7090000
P21107	Tropomyosin alpha-3 chain	Tpm3	R.KLVIIEGDLERTEERA.E	169	184		15200000	23200000	25400000	19800000	11300000	6070000	3270000	17300000	10600000	8970000	4570000	0	0	0
P21107	Tropomyosin alpha-3 chain	Tpm3	K.SLEAQAEKYSQK.E	207	218		0	6360000	8110000	10500000	6810000	92600000	13600000	7860000	14600000	16900000	17100000	12000000	13000000	5350000
P21107	Tropomyosin alpha-3 chain	Tpm3	R.TEERAELA.E	180	187		45800000	70400000	70000000	35400000	93900000	58300000	49400000	34800000	50400000	81100000	61900000	52000000	59900000	41800000
P21107	Tropomyosin alpha-3 chain	Tpm3	D.AQEKLELA.E	68	75		0	0	0	13200000	12100000	16200000	16000000	0	9130000	15000000	18100000	14700000	7920000	17500000
P21107	Tropomyosin alpha-3 chain	Tpm3	K.SLEAQAEKY.S	207	215		18900000	10400000	0	0	5900000	0	0	6510000	0	15400000	30300000	7340000	13300000	13900000
P21107	Tropomyosin alpha-3 chain	Tpm3	K.DAQEKLELA.E	67	75		0	2760000	1720000	4180000	6990000	7760000	8660000	3380000	6040000	8760000	14000000	21100000	29200000	29100000
P21107	Tropomyosin alpha-3 chain	Tpm3	D.AQEKLELAEKK.A	68	78		15300000	8450000	11800000	58600000	0	4300000	0	12600000	7960000	6440000	0	2050000	0	0
P21107	Tropomyosin alpha-3 chain	Tpm3	R.SKQLEDEL.A	37	44		0	2200000	7250000	9680000	11700000	0	18800000	0	7170000	0	14700000	18400000	24400000	15200000
P21107	Tropomyosin alpha-3 chain	Tpm3	K.LVIIEGDLER.T	170	179		8080000	18400000	24000000	25900000	23600000	18100000	11300000	9820000	16300000	27400000	29100000	27000000	27400000	23300000
P21107	Tropomyosin alpha-3 chain	Tpm3	Y.SQKEDKYEEEI.K	216	226		0	0	9690000	2050000	4300000	7090000	9600000	23900000	12500000	6350000	7820000	7940000	10700000	12400000
P21107	Tropomyosin alpha-3 chain	Tpm3	E.DELYAQK.L	259	265		0	0	0	27700000	4740000	4780000	6120000	4390000	0	5120000	14100000	13600000	12800000	19400000
P21107	Tropomyosin alpha-3 chain	Tpm3	R.ALKDEEKMELQ.E	135	145		10100000	7920000	4140000	11600000	9980000	12600000	29500000	4260000	13400000	20500000	20700000	25800000	33200000	37200000
P21107	Tropomyosin alpha-3 chain	Tpm3	I.DDLEDELYAQK.L	255	265		5270000	7320000	4810000	7640000	5040000	4340000	6680000	6530000	7960000	13100000	15600000	19600000	30100000	38400000
P21107	Tropomyosin alpha-3 chain	Tpm3	K.LVIIEGDLERTEERA.E	170	184		9960000	16600000	18900000	16500000	13400000	15900000	13800000	9580000	12200000	12100000	10800000	5230000	2300000	0
P21107	Tropomyosin alpha-3 chain	Tpm3	A.ESKC(+57.02)SELEEELKNV.T	188	201		3450000	7440000	6400000	9090000	19900000	24800000	24900000	12400000	17300000	13300000	14700000	130000	9480000	5580000
P21107	Tropomyosin alpha-3 chain	Tpm3	K.GTEDELDKYSEALKDAQEKLELAEKKA.A	53	79		82800000	70700000	67500000	67300000	37800000	6930000	2440000	113000000	31600000	13100000	0	0	0	0
P21107	Tropomyosin alpha-3 chain	Tpm3	I.EGDLERTEERA.E	174	184		7200000	11100000	6260000	11400000	11200000	10700000	2190000	7430000	7570000	6840000	4440000	0	0	0
P21107	Tropomyosin alpha-3 chain	Tpm3	Q.KEDKYEEEI.K	218	226		0	0	2980000	0	10800000	15700000	19300000	0	4170000	5770000	7590000	8720000	12800000	12200000
P21107	Tropomyosin alpha-3 chain	Tpm3	T.IDDLEDELYAQKLK.Y	254	267		4510000	4690000	7650000	9820000	11100000	13200000	11500000	4170000	6280000	13300000	11700000	12700000	14400000	10600000
P21107	Tropomyosin alpha-3 chain	Tpm3	K.LVIIEGDLERTEERAELA.E	170	187		31800000	22000000	23700000	14300000	6500000	992000	0	22400000	13300000	7380000	2700000	0	0	0
P21107	Tropomyosin alpha-3 chain	Tpm3	L.VIIEGDLER.T	171	179		14400000	10800000	8410000	0	8980000	16100000	8570000	30300000	23700000	16300000	25100000	22000000	37100000	0
P21107	Tropomyosin alpha-3 chain	Tpm3	K.MQMLKLDKEN.V	9	18		7040000	15100000	8110000	5790000	4310000	991000	0	79700000	71800000	33300000	7200000	20500000	21800000	23100000
P21107	Tropomyosin alpha-3 chain	Tpm3	N.RALKDEEKMELQEI.Q	134	147		9370000	10000000	8390000	7360000	5470000	3940000	1710000	9040000	10100000	6220000	3830000	1160000	728000	641000
P21107	Tropomyosin alpha-3 chain	Tpm3	R.SKQLEDELA.T	37	45		0	0	13900000	4500000	6310000	0	6860000	2950000	8050000	6750000	8070000	11200000	6460000	7050000
P21107	Tropomyosin alpha-3 chain	Tpm3	D.AQEKLELAEKKA.A	68	79		3330000	19700000	21700000	0	18900000	5450000	0	3420000	0	0	0	0	0	0
P21107	Tropomyosin alpha-3 chain	Tpm3	K.GTEDELDKYSEALKDAQEKL.E	53	72		5530000	13500000	14900000	39300000	80400000	126000000	200000000	10500000	44300000	93700000	168000000	218000000	374000000	374000000
P21107	Tropomyosin alpha-3 chain	Tpm3	L.VIIEGDLERT.E	171	180		4990000	5400000	5570000	2980000	6830000	1090000	3370000	4040000	6920000	2380000	3160000	6940000	8160000	6080000
P21107	Tropomyosin alpha-3 chain	Tpm3	K.SLEAQAEKYS.Q	207	216		0	0	3380000	7150000	11800000	5880000	13400000	0	4120000	5740000	4050000	7280000	5160000	4300000
P21107	Tropomyosin alpha-3 chain	Tpm3	D.AQEKLELAEK.K	68	77		8780000	3160000	8810000	7720000	4280000	4440000	8890000	7920000	7040000	8550000	7570000	4840000	2270000	7060000
P21107	Tropomyosin alpha-3 chain	Tpm3	K.GTEDELDKYSEALK.D	53	66		1570000	1530000	0	3310000	2400000	3610000	5520000	12200000	10200000	24000000	47500000	38900000	114000000	59700000
P21107	Tropomyosin alpha-3 chain	Tpm3	E.DELYAQKLK.Y	259	267		1870000	9300000	4370000	6300000	10700000	12400000	18400000	5800000	5060000	4390000	1620000	2130000	3280000	4430000
P21107	Tropomyosin alpha-3 chain	Tpm3	I.LTDKLKEAET.R	229	238		0	0	0	6380000	4950000	16200000	3430000	833000	11000000	0	0	0	0	0
P21107	Tropomyosin alpha-3 chain	Tpm3	A.LKDAQEKLELA.E	65	75		0	4460000	8810000	14100000	25600000	38600000	51000000	2780000	26400000	18700000	29700000	27000000	31700000	30600000
P21107	Tropomyosin alpha-3 chain	Tpm3	R.AELAESKC(+57.02)SELEEELK.N	184	199	Carbamidomethylation	4670000	3340000	2370000	5860000	6400000	0	3780000	0	2600000	2260000	5410000	1450000	19500000	1350000
P21107	Tropomyosin alpha-3 chain	Tpm3	K.LKGTEDELDKYSEALKDAQEKLELAEK.K	51	77		18900000	27600000	38700000	18300000	0	0	0	15400000	4990000	14900000	4200000	0	0	0
P21107	Tropomyosin alpha-3 chain	Tpm3	K.LKGTEDELDKYSEALKDAQEKLELA.E	51	75		83500000	195000000	149000000	221000000	161000000	180000000	134000000	106000000	189000000	154000000	147000000	77600000	64500000	25400000
P21107	Tropomyosin alpha-3 chain	Tpm3	R.AELAESKC(+57.02)SELEEELKNV.T	184	201	Carbamidomethylation	0	2670000	3430000	2740000	7880000	6820000	7420000	0	544000	9700000	6590000	6720000	2900000	5780000
P21107	Tropomyosin alpha-3 chain	Tpm3	R.ALKDEEKMELQEI.Q	135	147		171000000	176000000	216000000	198000000	194000000	133000000	95500000	219000000	230000000	181000000	109000000	97600000	72200000	52100000
P21107	Tropomyosin alpha-3 chain	Tpm3	R.ALKDEEKMEL.Q	135	144		7080000	2490000	4470000	11000000	9130000	20000000	11200000	0	2250000	6830000	11200000	4310000	14500000	27700000
P21107	Tropomyosin alpha-3 chain	Tpm3	D.ELYAQKLK.Y	260	267		9940000	6070000	6050000	4570000	5150000	3850000	2730000	0	0	1540000	0	0	0	0
P21107	Tropomyosin alpha-3 chain	Tpm3	D.LEDELYAQK.L	257	265		24900000	22300000	25300000	26500000	26600000	25700000	31100000	27500000	21700000	28900000	36000000	32400000	36400000	26700000
P21107	Tropomyosin alpha-3 chain	Tpm3	S.ELEEELKNV.T	193	201		3430000	4540000	1810000	2860000	3310000	7610000	0	0	3040000	0	4870000	5960000	7420000	8390000
P21107	Tropomyosin alpha-3 chain	Tpm3	K.C(+57.02)SELEEELKNV.T	191	201	Carbamidomethylation	0	0	0	0	0	0	0	0	4440000	4490000	6610000	9590000	11200000	13400000
P21107	Tropomyosin alpha-3 chain	Tpm3	C.SELEEELKNVTNNLK.S	192	206		6360000	7470000	7860000	6330000	6780000	5100000	0	2590000	5430000	5260000	3400000	2010000	0	0
P21107	Tropomyosin alpha-3 chain	Tpm3	K.TIDDLEDELYAQKLK.Y	253	267		239000000	333000000	379000000	398000000	381000000	373000000	358000000	376000000	429000000	440000000	405000000	367000000	324000000	224000000
P21107	Tropomyosin alpha-3 chain	Tpm3	V.IIEGDLER.T	172	179		5310000	0	6540000	5320000	0	4930000	6770000	3100000	3590000	3560000	3910000	4750000	9220000	10600000
P21107	Tropomyosin alpha-3 chain	Tpm3	K.LEKTIDDLEDELYAQKLK.Y	250	267		8090000	0	6780000	4880000	1020000	0	0	12500000	9210000	6060000	0	0	0	0
P21107	Tropomyosin alpha-3 chain	Tpm3	I.DDLEDELYAQKLK.Y	255	267		270000000	333000000	226000000	289000000	250000000	313000000	329000000	263000000	372000000	248000000	227000000	146000000	261000000	282000000
P21107	Tropomyosin alpha-3 chain	Tpm3	K.GTEDELDKYSEALKDAQEKLELAEKKAADAEAEVA.S	53	87		38600000	17200000	9030000	4520000	0	0	0	29400000	7950000	0	0	0	0	0
P21107	Tropomyosin alpha-3 chain	Tpm3	R.KLVIIEGDLERTEER.A	169	183		5020000	7550000	9150000	3190000	4760000	0	0	5820000	1950000	4190000	1240000	0	0	0
P21107	Tropomyosin alpha-3 chain	Tpm3	I.LTDKLKEAETR.A	229	239		0	4350000	6170000	3750000	5080000	4300000	3870000	4810000	0	0	0	0	0	0
P21107	Tropomyosin alpha-3 chain	Tpm3	I.AEEADRKYEEVA.R	156	167		0	3100000	5360000	5450000	21600000	10900000	17400000	3140000	18500000	16200000	12000000	13800000	14600000	16100000
P21107	Tropomyosin alpha-3 chain	Tpm3	K.GTEDELDKYS.E	53	62		0	0	0	2900000	1400000	3430000	2790000	0	0	0	0	9710000	5810000	7200000
P21107	Tropomyosin alpha-3 chain	Tpm3	K.LKGTEDELDKYSEALKDAQEKLELAEKKA.A	51	79		6290000	22200000	10900000	10400000	1260000	0	0	7590000	0	758000	0	0	0	0
P21107	Tropomyosin alpha-3 chain	Tpm3	T.EERAELAESKC(+57.02)SELEEELKNV.T	181	201	Carbamidomethylation	2570000	3880000	2970000	2930000	2110000	1450000	1670000	4690000	5090000	5200000	6460000	1540000	0	0
P21107	Tropomyosin alpha-3 chain	Tpm3	K.GTEDELDKYSEAL.K	53	65		0	663000	0	0	1740000	3080000	3040000	0	1750000	1550000	2070000	3730000	6810000	8110000
P21107	Tropomyosin alpha-3 chain	Tpm3	K.GTEDELDKYSEALKDA.Q	53	68		0	6330000	4710000	11800000	14400000	24000000	30400000	5250000	4730000	9120000	14700000	27800000	33000000	53500000
P21107	Tropomyosin alpha-3 chain	Tpm3	K.LKGTEDELDKYSEA.L	51	64		0	0	0	3350000	7240000	5150000	14000000	0	2840000	0	8540000	6080000	1880000	9520000
P21107	Tropomyosin alpha-3 chain	Tpm3	S.EALKDAQEKLELA.E	63	75		0	0	195000	6010000	7330000	15600000	19000000	0	3300000	6020000	13100000	16800000	22300000	21100000
P21107	Tropomyosin alpha-3 chain	Tpm3	D.KYSEALKDAQEKLELA.E	60	75		0	3150000	1730000	0	3340000	4740000	3620000	0	4110000	6420000	0	0	0	0
P21107	Tropomyosin alpha-3 chain	Tpm3	R.ALKDEEKM(+15.99)ELQEI.Q	135	147	Oxidation (M)	19700000	12900000	19200000	15200000	23600000	13700000	14000000	20500000	20900000	17100000	21600000	18900000	16700000	12600000
P21107	Tropomyosin alpha-3 chain	Tpm3	E.EEIKILTDKLK.E	224	234		0	0	2000000	0	2010000	3950000	4670000	1520000	3020000	3730000	0	2880000	2800000	0
P21107	Tropomyosin alpha-3 chain	Tpm3	A.ELAESKC(+57.02)SELEEELKNV.T	185	201	Carbamidomethylation	0	0	0	0	4590000	1930000	6550000	1600000	2210000	0	3340000	4280000	4980000	3740000
P21107	Tropomyosin alpha-3 chain	Tpm3	K.LVIIEGDLERT.E	170	180		42200000	59400000	67000000	98300000	118000000	114000000	112000000	55100000	83400000	84200000	139000000	85200000	71500000	54100000
P21107	Tropomyosin alpha-3 chain	Tpm3	A.EEADRKYEEVAR.K	157	168		0	2280000	4530000	0	5570000	0	0	5230000	3740000	0	0	0	0	0
P21107	Tropomyosin alpha-3 chain	Tpm3	D.DLEDELYAQKLKYK.A	256	269		84000000	53300000	30900000	21700000	16700000	15800000	9390000	7340000	0	0	0	0	0	0
P21107	Tropomyosin alpha-3 chain	Tpm3	R.ALKDEEKMELQEIQLKEAK.H	135	153		62400000	19500000	4060000	1890000	0	0	0	18700000	0	0	0	0	0	0
P21107	Tropomyosin alpha-3 chain	Tpm3	K.YSQKEDKYEEEIKILTDKLKEAET.R	215	238		5280000	8940000	9150000	0	0	0	0	4220000	0	0	0	0	0	0
P21107	Tropomyosin alpha-3 chain	Tpm3	K.HIAEEADRKYEEVARK.L	154	169		7350000	3910000	3110000	0	0	0	0	0	0	0	0	0	0	0
P21107	Tropomyosin alpha-3 chain	Tpm3	C.SELEEELKNV.T	192	201		16300000	22800000	27900000	43200000	52200000	59500000	73200000	17400000	30700000	37900000	61100000	72300000	72400000	78000000
P21107	Tropomyosin alpha-3 chain	Tpm3	K.SLEAQAEKYSQKEDKYEEEIKILTDKLK.E	207	234		16600000	23200000	22700000	8190000	3590000	0	0	8340000	5730000	1080000	0	0	0	0
P21107	Tropomyosin alpha-3 chain	Tpm3	D.ELDKYSEALKDAQEKLELA.E	57	75		0	0	1360000	1310000	3320000	3550000	3620000	1230000	1690000	1860000	1860000	2690000	1450000	0
P21107	Tropomyosin alpha-3 chain	Tpm3	A.LKDAQEKLELAEKKAADAEAEVA.S	65	87		4120000	3050000	0	1920000	2820000	2810000	0	3940000	0	0	0	0	0	0
P21107	Tropomyosin alpha-3 chain	Tpm3	I.IEGDLERTEERAELA.E	173	187		5790000	4820000	5590000	4550000	0	0	0	7790000	5150000	3190000	0	0	0	0
P21107	Tropomyosin alpha-3 chain	Tpm3	K.GTEDELDKYSEALKDAQEKLELA.E	53	75		170000000	360000000	355000000	532000000	645000000	581000000	536000000	522000000	911000000	938000000	1040000000	732000000	608000000	271000000
P21107	Tropomyosin alpha-3 chain	Tpm3	A.LKDAQEKLELAEK.K	65	77		0	0	2710000	2820000	3560000	2430000	1510000	0	1670000	2100000	4200000	0	0	0
P21107	Tropomyosin alpha-3 chain	Tpm3	K.HIAEEADRKYEEVA.R	154	167		0	0	0	3970000	0	5750000	0	0	0	0	8200000	1610000	0	0
P21107	Tropomyosin alpha-3 chain	Tpm3	K.KLKGTEDELDKYSEALKDA.Q	50	68		0	0	0	0	0	17600000	0	0	0	0	0	1400000	0	0
P21107	Tropomyosin alpha-3 chain	Tpm3	Y.SEALKDAQEKLELA.E	62	75		0	6360000	5520000	3380000	2510000	4950000	10800000	0	1330000	0	0	4940000	1340000	8220000
P21107	Tropomyosin alpha-3 chain	Tpm3	R.KLVIIEGDLER.T	169	179		7440000	15600000	20400000	23800000	13000000	18500000	16800000	8620000	12200000	21800000	19000000	10900000	3100000	0
P21107	Tropomyosin alpha-3 chain	Tpm3	K.EDKYEEEIKILTDKLK.E	219	234		0	0	0	1980000	294000	0	0	1710000	4450000	6150000	4530000	0	0	0
P21107	Tropomyosin alpha-3 chain	Tpm3	I.EGDLERTEERAELA.E	174	187		3600000	2550000	2180000	2140000	0	0	0	2470000	2100000	0	0	0	0	0
P21107	Tropomyosin alpha-3 chain	Tpm3	K.GTEDELDKYSEA.L	53	64		2220000	8830000	3840000	8480000	15500000	16000000	28400000	4710000	10200000	9980000	13100000	23500000	34600000	55200000
P21107	Tropomyosin alpha-3 chain	Tpm3	K.GTEDELDKYSEALKDAQEK.L	53	71		3800000	3330000	5970000	4090000	3800000	3870000	1730000	7350000	2310000	2450000	5170000	12300000	11000000	14800000
P21107	Tropomyosin alpha-3 chain	Tpm3	K.DAQEKLELAEKKAADAEAEVA.S	67	87		1680000	2000000	2580000	1570000	888000	0	0	0	1850000	884000	849000	0	0	0
P21107	Tropomyosin alpha-3 chain	Tpm3	D.KYEEEIKILTDKLK.E	221	234		3990000	2760000	3420000	0	664000	0	0	3480000	887000	403000	0	0	0	0
P21107	Tropomyosin alpha-3 chain	Tpm3	R.TEERAELAESKC(+57.02)SELEEELKNV.T	180	201		0	0	0	0	0	0	0	4280000	0	10800000	0	0	0	0
P21107	Tropomyosin alpha-3 chain	Tpm3	Y.SQKEDKYEEEIKILTDKLK.E	216	234		2100000	2310000	1740000	1810000	5950000	1070000	3040000	2600000	2570000	2920000	0	0	0	0
P21107	Tropomyosin alpha-3 chain	Tpm3	L.EDELYAQKLK.Y	258	267		7910000	6520000	12300000	9530000	10300000	14400000	12100000	4040000	10700000	5340000	7930000	6910000	8510000	8510000
P21107	Tropomyosin alpha-3 chain	Tpm3	D.DLEDELYAQKL.K	256	266		0	1880000	3440000	3220000	5460000	7890000	9470000	5870000	7840000	9640000	10300000	10500000	9900000	9170000
P21107	Tropomyosin alpha-3 chain	Tpm3	R.KLVIIEGDLERTEERAELA.E	169	187		48900000	34000000	31300000	16000000	12300000	3480000	1070000	93400000	95700000	72400000	40200000	18000000	1480000	1120000
P21107	Tropomyosin alpha-3 chain	Tpm3	I.IEGDLERTEERA.E	173	184		1920000	2250000	3760000	8210000	5600000	5490000	2940000	7240000	6280000	12700000	3190000	3890000	5150000	5620000
P21107	Tropomyosin alpha-3 chain	Tpm3	C.SELEEELKNVTN.N	192	203		0	0	0	5590000	0	0	655000	0	0	1020000	0	1390000	585000	0
P21107	Tropomyosin alpha-3 chain	Tpm3	L.DHALNDMT.S	276	283		0	0	0	0	0	1020000	2200000	0	0	1400000	2630000	752000	3940000	0
P21107	Tropomyosin alpha-3 chain	Tpm3	K.KLKGTEDELDKYSEALKDAQEKLELAEKKAADAEAEVA.S	50	87		7820000	3900000	0	0	0	0	0	0	0	0	0	0	0	0
P21107	Tropomyosin alpha-3 chain	Tpm3	D.HALNDMTSI	277	285		0	0	0	0	0	0	0	1970000	0	2010000	0	2480000	726000	1860000
P21107	Tropomyosin alpha-3 chain	Tpm3	K.AADAEAEVASLNR.R	79	91		2490000	0	1390000	1280000	0	0	0	0	0	5070000	0	0	0	0
P21107	Tropomyosin alpha-3 chain	Tpm3	K.GTEDELDKYSEALKD.A	53	67		0	0	0	624000	0	0	0	1220000	1610000	1520000	1210000	911000	1540000	0
P21107	Tropomyosin alpha-3 chain	Tpm3	I.KILTDKLKEAET.R	227	238		1300000	6180000	719000	1080000	1180000	2330000	2070000	699000	0	0	0	0	0	0
P21107	Tropomyosin alpha-3 chain	Tpm3	K.GTEDELDKYSEALKDAQEKLELAEKK.A	53	78		28400000	48200000	48900000	30900000	14300000	0	0	66200000	58600000	63200000	32400000	1530000	0	0
P21107	Tropomyosin alpha-3 chain	Tpm3	A.LKDAQEKLELAEKKA.A	65	79		0	0	0	2740000	3230000	4870000	1900000	0	0	0	0	0	0	0
P21107	Tropomyosin alpha-3 chain	Tpm3	K.LKGTEDELDKYSEALKDAQEKLELAEKKAADAEAEVA.S	51	87		4480000	0	0	0	0	0	0	0	0	0	0	0	0	0
P21107	Tropomyosin alpha-3 chain	Tpm3	K.SLEAQAEKYSQKEDKYEEEIKILTDKLKEAET.R	207	238		3160000	0	1140000	0	0	0	0	0	0	0	0	0	0	0
P21107	Tropomyosin alpha-3 chain	Tpm3	K.DAQEKLELAEKKA.A	67	79		0	1080000	1990000	1530000	2540000	1550000	0	0	0	1120000	0	0	0	0
P21107	Tropomyosin alpha-3 chain	Tpm3	R.ALKDEEKMELQEIQLKEAKHI.A	135	155		6990000	0	0	0	0	0	0	0	0	0	0	0	0	0
P21107	Tropomyosin alpha-3 chain	Tpm3	R.AEQAEAEQKQAEERSKQLEDEL.A	23	44		0	0	0	0	0	3650000	8860000	0	0	0	0	0	0	0
P21107	Tropomyosin alpha-3 chain	Tpm3	D.LEDELYAQKLKYK.A	257	269		3020000	1870000	868000	0	0	0	0	0	0	0	0	0	0	0
P21107	Tropomyosin alpha-3 chain	Tpm3	K.TIDDLEDELYAQKLKYK.A	253	269		88300000	76700000	53200000	46900000	20900000	14300000	8250000	10400000	1380000	777000	0	0	0	0
P21107	Tropomyosin alpha-3 chain	Tpm3	K.SLEAQAEKYSQKEDKYE.E	207	223		0	1540000	2280000	10900000	17800000	30000000	25700000	1420000	2470000	4460000	4220000	5860000	5860000	2450000
P21107	Tropomyosin alpha-3 chain	Tpm3	K.TIDDLEDELYAQKL.K	253	266		0	0	0	0	3110000	5080000	6320000	1920000	3620000	5860000	4100000	0	4800000	2110000
P21107	Tropomyosin alpha-3 chain	Tpm3	K.EDKYEEEIK.I	219	227		0	0	0	0	0	0	0	0	0	0	1700000	2210000	1410000	2780000
P21107	Tropomyosin alpha-3 chain	Tpm3	K.YSQKEDKYEEEIK.I	215	227		0	0	0	0	0	0	0	0	0	0	933000	0	6170000	3080000
P21107	Tropomyosin alpha-3 chain	Tpm3	K.TIDDLEDELYA.Q	253	263		0	0	0	0	0	0	0	0	0	0	991000	1230000	2410000	2740000
P21107	Tropomyosin alpha-3 chain	Tpm3	L.DHALNDMTSI	276	285		2900000	3750000	4880000	3010000	3420000	3030000	0	4240000	2210000	3220000	3230000	3130000	6880000	6750000
P21107	Tropomyosin alpha-3 chain	Tpm3	D.AQEKLELAEKKAADAEAEVA.S	68	87		3180000	933000	0	0	0	0	0	0	0	0	0	0	0	0
P21107	Tropomyosin alpha-3 chain	Tpm3	K.KLKGTEDELDKYSEALKDAQEKLELAEKKA.A	50	79		7670000	11200000	8590000	1730000	0	0	0	0	0	0	0	0	0	0
P21107	Tropomyosin alpha-3 chain	Tpm3	T.EDELDKYSEALKDAQEKL.E	55	72		0	0	0	0	624000	978000	2190000	0	0	0	0	0	0	3190000
P21107	Tropomyosin alpha-3 chain	Tpm3	K.LKGTEDELDKYSEAL.K	51	65		0	2300000	0	0	0	0	0	0	0	0	560000	1990000	0	2030000
P21107	Tropomyosin alpha-3 chain	Tpm3	K.KLKGTEDELDKYSEALKDAQEKLELAEK.K	50	77		2800000	2570000	13100000	11100000	6370000	0	0	0	849000	0	0	0	0	0
P21107	Tropomyosin alpha-3 chain	Tpm3	I.DDLEDELYAQKL.K	255	266		0	0	1050000	2130000	1270000	4430000	4620000	1240000	3680000	4080000	2420000	5450000	4290000	7360000
P21107	Tropomyosin alpha-3 chain	Tpm3	E.DELDKYSEALKDAQEK.L	56	71		0	0	0	0	1370000	2820000	0	0	0	0	0	0	2360000	7380000
P21107	Tropomyosin alpha-3 chain	Tpm3	R.ALKDEEKM(+15.99)ELQEIQLKEAK.H	135	153	Oxidation (M)	5820000	0	0	0	0	0	0	0	0	0	0	0	0	0
P21107	Tropomyosin alpha-3 chain	Tpm3	T.EDELDKYSEALKDAQEKLELA.E	55	75		0	0	507000	955000	4950000	6440000	8450000	0	668000	0	2820000	605000	0	0
P21107	Tropomyosin alpha-3 chain	Tpm3	E.DELDKYSEALKDAQEKLELA.E	56	75		2300000	14600000	27900000	63200000	91500000	151000000	180000000	12200000	37400000	79000000	128000000	104000000	97300000	80300000
P21107	Tropomyosin alpha-3 chain	Tpm3	R.KLVIIEGDLERTEERAELAESKC(+57.02).S	169	191	Carbamidomethylation	1650000	0	0	0	0	0	0	0	0	0	0	0	0	0
P21107	Tropomyosin alpha-3 chain	Tpm3	K.GTEDELDKYSEALKDAQEKLELAEK.K	53	77		72200000	89300000	115000000	84200000	37200000	8850000	0	134000000	95700000	132000000	50500000	12900000	0	0
P21107	Tropomyosin alpha-3 chain	Tpm3	D.DLEDELYAQK.L	256	265		7530000	10300000	11900000	3550000	13200000	13000000	15200000	9890000	15600000	30800000	36200000	44100000	52000000	52400000
P21107	Tropomyosin alpha-3 chain	Tpm3	K.LKGTEDELDKYSEALKDAQEKL.E	51	72		0	7000000	2380000	9430000	15300000	33900000	44300000	692000	9650000	9420000	14500000	17600000	20300000	29400000
P21107	Tropomyosin alpha-3 chain	Tpm3	R.ALKDEEKMELQEIQLK.E	135	150		2160000	0	0	0	0	0	0	0	0	0	0	0	0	0
P21107	Tropomyosin alpha-3 chain	Tpm3	E.DELDKYSEALKDAQEKLE.L	56	73		0	0	0	0	0	1300000	5740000	2110000	0	0	426000	0	0	0
P21107	Tropomyosin alpha-3 chain	Tpm3	D.LERTEERAELA.E	177	187		2200000	0	0	0	0	0	0	1040000	0	0	0	0	0	0
P21107	Tropomyosin alpha-3 chain	Tpm3	E.DELDKYSEALKDAQEKLELAEKKA.A	56	79		0	816000	2310000	1270000	0	0	763000	0	0	0	0	0	0	0
P21107	Tropomyosin alpha-3 chain	Tpm3	K.DAQEKLELAEK.K	67	77		0	48900000	1350000	1480000	1270000	3880000	741000	1610000	3280000	5320000	3650000	4410000	22000000	0
P21107	Tropomyosin alpha-3 chain	Tpm3	K.GTEDELDKYSEALKDAQEKLE.L	53	73		0	0	0	710000	899000	2110000	5490000	0	0	0	0	0	2550000	1830000
P21107	Tropomyosin alpha-3 chain	Tpm3	I.DDLEDELYAQKLKYKAI.S	255	271		0	0	0	0	0	696000	959000	0	0	989000	0	0	0	0
P21107	Tropomyosin alpha-3 chain	Tpm3	E.DELDKYSEALK.D	56	66		0	0	0	1780000	3100000	3380000	6090000	0	0	5170000	9020000	11400000	17300000	27400000
P21107	Tropomyosin alpha-3 chain	Tpm3	D.KYEEEIKILTDKLKEAET.R	221	238		0	0	0	0	0	0	0	0	0	0	0	2100000	0	0
P21107	Tropomyosin alpha-3 chain	Tpm3	D.DLEDELYA.Q	256	263		0	0	0	0	0	0	0	0	0	0	0	543000	1060000	1940000
P21107	Tropomyosin alpha-3 chain	Tpm3	N.LKSLEAQAEKYSQKEDKYEEEI.K	205	226		1240000	0	0	0	0	0	0	0	0	0	0	0	0	0
P21107	Tropomyosin alpha-3 chain	Tpm3	R.SVAKLEKTIDDLEDELYAQKLK.Y	246	267		0	0	0	0	0	0	0	0	0	0	0	0	0	0
P21107	Tropomyosin alpha-3 chain	Tpm3	D.LEDELYAQKLK.Y	257	267		50200000	29100000	26500000	53900000	27800000	59000000	63700000	60300000	33800000	32600000	27000000	12400000	8480000	3320000
P21107	Tropomyosin alpha-3 chain	Tpm3	V.IIEGDLERTEERAELA.E	172	187		718000	0	306000	0	0	0	0	892000	409000	0	0	0	0	0
P21107	Tropomyosin alpha-3 chain	Tpm3	E.DELDKYSEALKDAQEKLELAEKK.A	56	78		0	0	1120000	0	0	0	0	0	1090000	1650000	0	0	0	0
P21107	Tropomyosin alpha-3 chain	Tpm3	K.KLKGTEDELDKYSEALK.D	50	66		0	0	0	0	0	1300000	1410000	0	0	0	0	0	0	0
P21107	Tropomyosin alpha-3 chain	Tpm3	E.DELDKYSEALKDAQEKLELAEK.K	56	77		0	0	6920000	10700000	8720000	2480000	0	0	5010000	6290000	3850000	1590000	0	0
P21107	Tropomyosin alpha-3 chain	Tpm3	E.DELDKYSEALKDAQEKL.E	56	72		0	0	1900000	5800000	8370000	22300000	49900000	0	2170000	5500000	21000000	38000000	68600000	131000000
P21107	Tropomyosin alpha-3 chain	Tpm3	K.C(+57.02)SELEEELK.N	191	199	Carbamidomethylation	0	0	0	0	0	0	0	0	0	0	0	0	0	2420000
P21107	Tropomyosin alpha-3 chain	Tpm3	D.DLEDELYAQ.K	256	264		0	0	0	0	0	0	0	0	0	0	0	385000	957000	1050000
P21107	Tropomyosin alpha-3 chain	Tpm3	K.LKGTEDELDKYSEALK.D	51	66		1380000	0	0	0	0	716000	0	0	0	2780000	5020000	6200000	9670000	13300000
P21107	Tropomyosin alpha-3 chain	Tpm3	A.KHIAEEADRKYEEVAR.K	153	168		3670000	0	0	0	0	0	0	0	0	0	0	0	0	0
P21107	Tropomyosin alpha-3 chain	Tpm3	T.EDELDKYSEALKDAQEKLELAEKKA.A	55	79		0	1990000	0	0	0	0	0	0	0	0	0	0	0	0
P21107	Tropomyosin alpha-3 chain	Tpm3	I.KILTDKLKEAETRAEFAER.S	227	245		0	0	0	0	0	0	0	0	0	0	0	0	0	0
P21107	Tropomyosin alpha-3 chain	Tpm3	I.DDLEDELYA.Q	255	263		0	0	0	0	0	0	0	0	0	0	0	201000	526000	1200000
P21107	Tropomyosin alpha-3 chain	Tpm3	K.KLKGTEDELDKYSEALKDAQEKL.E	50	72		0	0	0	2270000	7530000	14400000	24600000	0	0	0	1090000	0	0	0
P21107	Tropomyosin alpha-3 chain	Tpm3	A.EEADRKYEEV.A	157	166		0	0	0	0	0	0	0	0	0	0	0	0	0	1550000
P21107	Tropomyosin alpha-3 chain	Tpm3	I.DDLEDELYAQKLKYK.A	255	269		169000000	123000000	82200000	73800000	60300000	48800000	39000000	31200000	0	1430000	0	0	0	0
P21107	Tropomyosin alpha-3 chain	Tpm3	D.ELDHALNDMTSI	274	285		0	0	0	0	0	0	1490000	0	0	0	0	0	0	0
P21107	Tropomyosin alpha-3 chain	Tpm3	K.KLKGTEDELDKYSEALKDAQEK.L	50	71		0	0	0	0	0	642000	0	0	0	0	0	826000	0	0
P21107	Tropomyosin alpha-3 chain	Tpm3	E.DELDKYSEALKDA.Q	56	68		0	0	0	0	0	893000	2100000	0	0	0	1790000	1990000	2690000	6730000
P21107	Tropomyosin alpha-3 chain	Tpm3	K.LKGTEDELDKYSEALKDAQEK.L	51	71		0	0	0	275000	0	0	0	0	0	0	0	0	1010000	0
P21107	Tropomyosin alpha-3 chain	Tpm3	K.YSEALKDAQEKLELA.E	61	75		0	0	0	0	0	0	0	0	0	0	0	0	0	1280000
P21107	Tropomyosin alpha-3 chain	Tpm3	K.YSQKEDKYEEEIKILTDKLKEAETR.A	215	239		0	0	0	0	0	0	0	0	0	0	0	0	0	0
P21107	Tropomyosin alpha-3 chain	Tpm3	S.EALKDAQEKL.E	63	72		0	0	0	0	0	0	0	0	0	0	0	0	0	1160000
P21107	Tropomyosin alpha-3 chain	Tpm3	K.LKGTEDELDKYSEALKDA.Q	51	68		0	0	0	0	0	1280000	2530000	0	0	429000	814000	711000	1230000	0
P21107	Tropomyosin alpha-3 chain	Tpm3	I.KILTDKLKEA.E	227	236		0	0	0	0	0	992000	0	0	0	0	0	0	0	0
P21107	Tropomyosin alpha-3 chain	Tpm3	E.DELDKYS.E	56	62		0	0	0	0	0	0	0	0	0	0	0	0	0	905000
P21107	Tropomyosin alpha-3 chain	Tpm3	G.TEDELDKYSEALKDAQEKL.E	54	72		0	0	0	0	0	0	0	0	0	0	0	0	0	896000
P21107	Tropomyosin alpha-3 chain	Tpm3	T.IDDLEDELYAQK.L	254	265		0	0	0	0	0	0	0	0	0	0	0	723000	0	0
P21107	Tropomyosin alpha-3 chain	Tpm3	D.KYSEALKDAQEKLELAEK.K	60	77		0	701000	0	0	0	0	0	0	0	0	0	0	0	0
P21107	Tropomyosin alpha-3 chain	Tpm3	K.VIENRALKDEEKMELQEI.Q	130	147		0	0	0	0	0	0	0	450000	250000	0	0	0	0	0
P21107	Tropomyosin alpha-3 chain	Tpm3	A.EAEQKQAEERSKQLEDEL.A	27	44		0	0	0	0	0	548000	0	0	0	0	0	0	0	0
P21107	Tropomyosin alpha-3 chain	Tpm3	A.EQAEAEQKQAEERSKQLEDEL.A	24	44		0	0	0	0	0	0	501000	0	0	0	0	0	0	0
P21107	Tropomyosin alpha-3 chain	Tpm3	Q.MLKLDKEN.V	11	18		0	0	0	3700000	5210000	0	0	0	0	0	0	0	0	0
P21107	Tropomyosin alpha-3 chain	Tpm3	K.KLKGTEDELDKYSEALKDAQEKLELAEKK.A	50	78		0	0	0	434000	0	0	0	0	0	0	0	0	0	0
P21107	Tropomyosin alpha-3 chain	Tpm3	V.EEELDRA.Q	97	103		1520000000	1850000000	2500000000	2720000000	2910000000	3220000000	3420000000	1970000000	3100000000	4080000000	4250000000	1850000000	3920000000	208000000
P21107	Tropomyosin alpha-3 chain	Tpm3	A.TALQKLEEAEKA.A	109	120		332000000	485000000	401000000	437000000	479000000	495000000	456000000	418000000	399000000	279000000	286000000	239000000	202000000	124000000
P21107	Tropomyosin alpha-3 chain	Tpm3	A.TALQKLEEAEKAA.D	109	121		150000000	225000000	162000000	160000000	169000000	170000000	160000000	192000000	173000000	4440000	80300000	55400000	27900000	15300000
P21107	Tropomyosin alpha-3 chain	Tpm3	R.LATALQKLEEAEKA.A	107	120		569000000	456000000	362000000	185000000	197000000	160000000	97400000	317000000	74900000	11700000	6060000	5110000	2640000	9830000
P21107	Tropomyosin alpha-3 chain	Tpm3	R.IQLVEEELDRA.Q	93	103		218000000	200000000	207000000	95300000	31500000	6770000	613000	335000000	117000000	72300000	27400000	11000000	0	7520000
P21107	Tropomyosin alpha-3 chain	Tpm3	V.EEELDRAQER.L	97	106		840000000	1860000000	2550000000	1240000000	988000000	726000000	664000000	1370000000	964000000	1170000000	843000000	868000000	616000000	494000000
P21107	Tropomyosin alpha-3 chain	Tpm3	V.EEELDRAQERLA.T	97	108		524000000	586000000	433000000	323000000	281000000	212000000	139000000	302000000	93800000	26700000	5030000	8010000	0	1430000
P21107	Tropomyosin alpha-3 chain	Tpm3	A.ETRAEFAER.S	237	245		267000000	263000000	209000000	155000000	130000000	124000000	87900000	171000000	66300000	0	0	0	0	0
P21107	Tropomyosin alpha-3 chain	Tpm3	A.TALQKLEEAEK.A	109	119		70900000	137000000	146000000	172000000	196000000	184000000	209000000	71900000	112000000	133000000	162000000	153000000	150000000	110000000
P21107	Tropomyosin alpha-3 chain	Tpm3	K.EDKYEEEI.K	219	226		7070000	24100000	28700000	45800000	49500000	45400000	43100000	18400000	44500000	71500000	98600000	116000000	125000000	137000000
P21107	Tropomyosin alpha-3 chain	Tpm3	A.ADESERGM(+15.99)KVI.E	121	131	Oxidation (M)	59000000	4950000	349000000	5620000	1770000	4120000	348000000	0	0	0	0	0	1540000	0
P21107	Tropomyosin alpha-3 chain	Tpm3	A.LQKLEEAEK.A	111	119		373000000	521000000	646000000	419000000	687000000	877000000	761000000	273000000	645000000	820000000	972000000	96500000	154000000	0
P21107	Tropomyosin alpha-3 chain	Tpm3	A.DESERGMKV.I	122	130		153000000	263000000	280000000	227000000	271000000	263000000	220000000	219000000	169000000	148000000	81100000	126000000	40800000	29300000
P21107	Tropomyosin alpha-3 chain	Tpm3	K.LEEAEKAADESER.G	114	126		74900000	152000000	69200000	83200000	63000000	42100000	68500000	101000000	104000000	174000000	205000000	208000000	171000000	252000000
P21107	Tropomyosin alpha-3 chain	Tpm3	A.ADESERGMKV.I	121	130		125000000	192000000	138000000	172000000	262000000	250000000	218000000	255000000	145000000	57500000	35600000	42900000	2060000	283000000
P21107	Tropomyosin alpha-3 chain	Tpm3	R.LATALQK.L	107	113		608000000	925000000	1140000000	951000000	830000000	797000000	682000000	1100000000	1110000000	1510000000	888000000	700000000	432000000	264000000
P21107	Tropomyosin alpha-3 chain	Tpm3	L.VEEELDRA.Q	96	103		17800000	25700000	26000000	20500000	22000000	30100000	33700000	17100000	23200000	21300000	24100000	32300000	22200000	20200000
P21107	Tropomyosin alpha-3 chain	Tpm3	K.LEEAEKAADESERGMK.V	114	129		78800000	94800000	115000000	69500000	34000000	39200000	37400000	129000000	56800000	32800000	29800000	19400000	13300000	16500000
P21107	Tropomyosin alpha-3 chain	Tpm3	A.DESERGM(+15.99)KVI.E	122	131	Oxidation (M)	8520000	8590000	4070000	4950000	25000000	5250000	40400000	5420000	9210000	24400000	33600000	42300000	79100000	0
P21107	Tropomyosin alpha-3 chain	Tpm3	L.QKLEEAEK.A	112	119		18800000	15600000	13500000	0	19000000	20200000	19700000	977000	24500000	92000000	49900000	0	0	0
P21107	Tropomyosin alpha-3 chain	Tpm3	K.LEEAEKAADESERGMKVI.E	114	131		136000000	83000000	77000000	41400000	10000000	8910000	12400000	52700000	5120000	0	0	0	0	0
P21107	Tropomyosin alpha-3 chain	Tpm3	A.DESERGMKVI.E	122	131		153000000	135000000	109000000	83800000	72900000	66600000	45800000	43900000	7000000	4230000	0	0	0	0
P21107	Tropomyosin alpha-3 chain	Tpm3	A.LQKLEE.A	111	116		0	0	8620000	1970000	9480000	5580000	5170000	12400000	19400000	16300000	13800000	16300000	14700000	50100000
P21107	Tropomyosin alpha-3 chain	Tpm3	A.ADESERGMKVI.E	121	131		125000000	108000000	67000000	46800000	47500000	34200000	29100000	27600000	0	6690000	8800000	7770000	0	0
P21107	Tropomyosin alpha-3 chain	Tpm3	V.EEELDRAQE.R	97	105		0	3600000	5770000	6760000	9780000	9460000	9240000	8460000	4170000	7490000	5920000	9870000	19300000	24000000
P21107	Tropomyosin alpha-3 chain	Tpm3	R.LATALQKLEEAEKAADESERGMKV.I	107	130		117000000	40600000	21000000	6870000	638000	0	0	14600000	0	0	0	0	0	0
P21107	Tropomyosin alpha-3 chain	Tpm3	L.VEEELDRAQERL.A	96	107		13700000	14800000	20000000	5300000	13900000	12700000	9070000	17500000	8990000	13500000	9680000	8970000	11100000	8080000
P21107	Tropomyosin alpha-3 chain	Tpm3	A.ETRAEFA.E	237	243		13200000	10100000	14100000	10100000	22800000	0	13400000	0	0	16700000	0	0	0	0
P21107	Tropomyosin alpha-3 chain	Tpm3	K.AADESERGMKVI.E	120	131		26100000	24200000	21700000	19400000	15200000	7630000	10500000	0	7060000	861000	1780000	4710000	1150000	999000
P21107	Tropomyosin alpha-3 chain	Tpm3	K.MQMLKLDK.E	9	16		10900000	11800000	0	7650000	12200000	6170000	8650000	0	0	11100000	5920000	11400000	0	0
P21107	Tropomyosin alpha-3 chain	Tpm3	A.LQKLEEAEKA.A	111	120		4810000	7970000	6810000	6070000	0	8750000	7550000	7470000	6620000	4920000	3970000	4300000	3610000	2670000
P21107	Tropomyosin alpha-3 chain	Tpm3	L.VEEELDRAQER.L	96	106		1630000	73700000	6360000	79400000	50800000	46000000	11700000	251000000	46100000	12700000	12500000	31600000	57000000	43600000
P21107	Tropomyosin alpha-3 chain	Tpm3	A.LQKLEEAEKAA.D	111	121		7700000	14000000	13000000	5930000	10500000	12200000	10100000	12600000	11200000	5320000	8290000	10500000	33200000	9370000
P21107	Tropomyosin alpha-3 chain	Tpm3	K.LEEAEKAADESERGMKV.I	114	130		39800000	48000000	47900000	15200000	28400000	17200000	2660000	52900000	28400000	29200000	0	0	0	0
P21107	Tropomyosin alpha-3 chain	Tpm3	K.EAETRAEFA.E	235	243		6600000	8800000	11600000	0	0	0	15600000	11500000	6580000	0	0	0	0	0
P21107	Tropomyosin alpha-3 chain	Tpm3	A.TALQKLEE.A	109	116		3940000	3770000	3630000	4450000	7530000	4070000	3750000	12400000	4730000	3190000	0	3250000	0	977000
P21107	Tropomyosin alpha-3 chain	Tpm3	T.ALQKLEEAEKA.A	110	120		15700000	12800000	17500000	21000000	3900000	17700000	2940000	0	29100000	20900000	9800000	5470000	9270000	2760000
P21107	Tropomyosin alpha-3 chain	Tpm3	V.EEELDRAQERL.A	97	107		3120000	15500000	985000	0	0	0	1520000	0	25900000	0	4720000	1710000	2550000	6530000
P21107	Tropomyosin alpha-3 chain	Tpm3	R.LATALQKLEEAEKAADESERGMK.V	107	129		216000000	80500000	47900000	11700000	3450000	0	0	104000000	10100000	0	0	0	0	0
P21107	Tropomyosin alpha-3 chain	Tpm3	T.ALQKLEEAEKAA.D	110	121		11800000	13500000	10500000	4420000	9870000	11800000	10800000	14000000	12300000	9070000	2640000	0	0	0
P21107	Tropomyosin alpha-3 chain	Tpm3	E.ELDRAQER.L	99	106		18600000	35000000	65800000	32500000	0	8850000	0	33800000	28200000	17600000	21500000	28400000	17000000	6060000
P21107	Tropomyosin alpha-3 chain	Tpm3	E.AETRAEFAER.S	236	245		18900000	0	12100000	32600000	40300000	18600000	28300000	24000000	21900000	0	19300000	0	49900000	0
P21107	Tropomyosin alpha-3 chain	Tpm3	R.AEFAERSVAK.L	240	249		55700000	103000000	140000000	167000000	183000000	192000000	215000000	123000000	180000000	521000000	468000000	580000000	493000000	539000000
P21107	Tropomyosin alpha-3 chain	Tpm3	K.LKEAETRAEFAER.S	233	245		25500000	5190000	9990000	0	0	0	0	13200000	0	0	0	0	0	0
P21107	Tropomyosin alpha-3 chain	Tpm3	E.LDRAQER.L	100	106		0	8210000	13600000	0	0	0	0	6650000	0	0	0	0	0	0
P21107	Tropomyosin alpha-3 chain	Tpm3	R.GMKVIENR.A	127	134		16500000	0	0	0	0	0	0	0	0	0	0	0	0	0
P21107	Tropomyosin alpha-3 chain	Tpm3	I.QLVEEELDRA.Q	94	103		0	4660000	4960000	3240000	8150000	0	3480000	2950000	8520000	6210000	4380000	4480000	3780000	0
P21107	Tropomyosin alpha-3 chain	Tpm3	V.EEELDRAQERLATALQKLEEAEKAA.D	97	121		124000000	32900000	9840000	0	0	0	0	7970000	0	0	0	0	0	0
P21107	Tropomyosin alpha-3 chain	Tpm3	E.ELKNVTNNLK.S	197	206		0	0	0	0	24700000	0	19600000	0	0	0	0	0	0	0
P21107	Tropomyosin alpha-3 chain	Tpm3	A.LQKLEEAEKAADESERGMKVI.E	111	131		57100000	30700000	2480000	672000	0	0	0	14700000	0	0	0	0	0	0
P21107	Tropomyosin alpha-3 chain	Tpm3	R.LATALQKL.E	107	114		5100000	5190000	5320000	2620000	5200000	4760000	1810000	2050000	1730000	0	0	0	0	0
P21107	Tropomyosin alpha-3 chain	Tpm3	R.LATALQKLEEAEKAADESERGM(+15.99)K.V	107	129	Oxidation (M)	9880000	5170000	4640000	0	0	0	0	0	0	0	0	0	0	0
P21107	Tropomyosin alpha-3 chain	Tpm3	K.EAETRAEFAER.S	235	245		438000000	313000000	378000000	214000000	117000000	72800000	29800000	257000000	128000000	86400000	31000000	18400000	9340000	25600000
P21107	Tropomyosin alpha-3 chain	Tpm3	V.EEELDRAQERLAT.A	97	109		4690000	5410000	3570000	7940000	4970000	0	0	2230000	0	0	2890000	2310000	513000	0
P21107	Tropomyosin alpha-3 chain	Tpm3	A.TALQKLEEA.E	109	117		2460000	7230000	1450000	3700000	7390000	5300000	2560000	0	712000	0	0	0	333000	4680000
P21107	Tropomyosin alpha-3 chain	Tpm3	K.AADESERGMKV.I	120	130		12200000	22700000	20000000	26300000	17800000	14700000	11600000	8520000	0	175000	0	879000	4230000	7090000
P21107	Tropomyosin alpha-3 chain	Tpm3	R.IQLVEEELDR.A	93	102		8500000	3450000	4260000	0	0	2820000	0	6080000	1690000	244000	0	0	0	0
P21107	Tropomyosin alpha-3 chain	Tpm3	R.LATALQKLE.E	107	115		4740000	4090000	4160000	3860000	3020000	2240000	0	4200000	1570000	0	0	0	0	0
P21107	Tropomyosin alpha-3 chain	Tpm3	E.EELDRAQERLA.T	98	108		8590000	7490000	5650000	7170000	2460000	9800000	1870000	2710000	0	0	0	0	0	0
P21107	Tropomyosin alpha-3 chain	Tpm3	Q.LVEEELDRAQER.L	95	106		2630000	7550000	3360000	6390000	2880000	8380000	5060000	0	0	0	0	0	3640000	3240000
P21107	Tropomyosin alpha-3 chain	Tpm3	R.LATALQKLEEAEKAADESERGM(+15.99)KVI.E	107	131	Oxidation (M)	48300000	13800000	3410000	0	0	0	0	6060000	0	0	0	0	0	0
P21107	Tropomyosin alpha-3 chain	Tpm3	N.RRIQLVEEELDRA.Q	91	103		7960000	0	1320000	0	0	0	0	5870000	0	0	0	0	0	0
P21107	Tropomyosin alpha-3 chain	Tpm3	R.LATALQKLEEAEKAA.D	107	121		555000000	437000000	349000000	221000000	169000000	147000000	88000000	415000000	88800000	8230000	2860000	2550000	3460000	4570000
P21107	Tropomyosin alpha-3 chain	Tpm3	V.EEELDRAQERLATALQKLEEAEKAADESERGMK.V	97	129		24600000	0	0	0	0	0	0	0	0	0	0	0	0	0
P21107	Tropomyosin alpha-3 chain	Tpm3	L.QKLEEAEKA.A	112	120		0	6810000	2410000	4370000	9120000	7240000	5650000	0	7420000	5790000	9850000	7350000	22300000	8330000
P21107	Tropomyosin alpha-3 chain	Tpm3	E.ADRKYEEVAR.K	159	168		0	0	0	0	0	0	0	0	0	1210000	0	4910000	0	0
P21107	Tropomyosin alpha-3 chain	Tpm3	A.TALQKLEEAEKAADESERGMK.V	109	129		123000000	78600000	62100000	38000000	24600000	14500000	13900000	108000000	37100000	21400000	9450000	5110000	1750000	0
P21107	Tropomyosin alpha-3 chain	Tpm3	K.EAETRAEFAERSVAK.L	235	249		0	3420000	3470000	7100000	0	2790000	0	4780000	0	0	0	0	0	0
P21107	Tropomyosin alpha-3 chain	Tpm3	A.TALQKLEEAEKAADESERGM(+15.99)K.V	109	129		9320000	7900000	6910000	2670000	0	0	0	10000000	0	0	0	0	0	0
P21107	Tropomyosin alpha-3 chain	Tpm3	R.IQLVEEELDRAQERLA.T	93	108		218000000	76800000	52300000	14400000	2500000	0	0	73100000	2790000	0	0	0	0	0
P21107	Tropomyosin alpha-3 chain	Tpm3	A.TALQKLEEAEKAAD.E	109	122		1570000	2220000	1450000	616000	0	2820000	1700000	8730000	3460000	2820000	4340000	5180000	5190000	4790000
P21107	Tropomyosin alpha-3 chain	Tpm3	R.LATALQKLEEAEKAADESERGMKVI.E	107	131		356000000	84900000	52500000	10600000	0	0	0	58900000	0	0	0	0	0	0
P21107	Tropomyosin alpha-3 chain	Tpm3	A.TALQKLEEAEKAADESERGM(+15.99)KV.I	109	130		4680000	4110000	0	0	0	0	0	2810000	0	0	0	0	0	0
P21107	Tropomyosin alpha-3 chain	Tpm3	L.ATALQKLEEAEKA.A	108	120		7650000	11400000	11200000	16100000	15700000	10900000	15000000	13700000	8580000	1070000	2630000	0	1520000	0
P21107	Tropomyosin alpha-3 chain	Tpm3	K.LEEAEKAADESERGM(+15.99)K.V	114	129		1090000	2170000	3600000	0	0	0	0	4500000	0	0	0	0	0	0
P21107	Tropomyosin alpha-3 chain	Tpm3	R.AEFAERSVAKLEK.T	240	252		24100000	11200000	9630000	7010000	6310000	4530000	0	5530000	0	0	0	0	0	0
P21107	Tropomyosin alpha-3 chain	Tpm3	A.LQKLEEAEKAADESERGM(+15.99)KVI.E	111	131		12400000	0	0	0	0	0	0	0	0	0	0	0	0	0
P21107	Tropomyosin alpha-3 chain	Tpm3	K.EAETRAEF.A	235	242		0	0	2110000	0	0	2570000	0	0	0	0	0	0	0	0
P21107	Tropomyosin alpha-3 chain	Tpm3	R.IQLVEEELDRAQER.L	93	106		118000000	66400000	72200000	21300000	2570000	1200000	0	113000000	11300000	7780000	0	0	0	741000
P21107	Tropomyosin alpha-3 chain	Tpm3	K.LEEAEKAADESERGM(+15.99)KVI.E	114	131	Oxidation (M)	26100000	7580000	10100000	4120000	0	0	0	14500000	0	0	0	0	0	0
P21107	Tropomyosin alpha-3 chain	Tpm3	V.EEELDRAQ.E	97	104		27700000	0	19700000	14200000	31400000	24100000	0	18000000	16100000	0	9320000	0	0	0
P21107	Tropomyosin alpha-3 chain	Tpm3	T.ALQKLEEAEK.A	110	119		0	0	0	3870000	13900000	3360000	2110000	0	3140000	5070000	7260000	1120000	1600000	0
P21107	Tropomyosin alpha-3 chain	Tpm3	R.RIQLVEEELDRAQER.L	92	106		5860000	0	0	0	0	0	0	0	0	0	0	0	0	0
P21107	Tropomyosin alpha-3 chain	Tpm3	L.DRAQERLA.T	101	108		0	0	0	0	9630000	0	0	0	0	0	0	0	0	0
P21107	Tropomyosin alpha-3 chain	Tpm3	E.FAERSVAK.L	242	249		0	0	0	3580000	0	3340000	0	0	0	6120000	0	0	0	0
P21107	Tropomyosin alpha-3 chain	Tpm3	K.EAETRAEFAERSV.A	235	247		17600000	1180000	3970000	0	941000	0	2890000	0	0	0	12300000	11700000	0	9270000
P21107	Tropomyosin alpha-3 chain	Tpm3	E.AEKAADESERGMKV.I	117	130		13700000	14600000	5600000	6470000	6540000	1250000	4880000	5050000	1850000	0	0	0	0	0
P21107	Tropomyosin alpha-3 chain	Tpm3	K.MQMLKLD.K	9	15		246000	1090000	1260000	1030000	1220000	0	0	2390000	1150000	0	0	0	0	0
P21107	Tropomyosin alpha-3 chain	Tpm3	E.ELDRAQERLA.T	99	108		2690000	6680000	1900000	0	4930000	0	0	7960000	0	1010000	0	0	13400000	0
P21107	Tropomyosin alpha-3 chain	Tpm3	V.EEELDRAQERLATALQKLEEAEK.A	97	119		10500000	1090000	998000	0	0	0	0	0	0	0	0	0	0	0
P21107	Tropomyosin alpha-3 chain	Tpm3	A.LQKLEEAEKAADESERGMKV.I	111	130		15200000	5210000	5720000	1810000	0	993000	0	2060000	0	0	0	0	0	0
P21107	Tropomyosin alpha-3 chain	Tpm3	L.ATALQKLEEAEKAA.D	108	121		3490000	11200000	3400000	2420000	3660000	5860000	1570000	1290000	1610000	0	0	0	0	0
P21107	Tropomyosin alpha-3 chain	Tpm3	R.LATALQKLEEAEKAADESERGM(+15.99)KV.I	107	130	Oxidation (M)	14400000	0	0	0	0	0	0	0	0	0	0	0	0	0
P21107	Tropomyosin alpha-3 chain	Tpm3	Q.KLEEAEKAADESERGMKVI.E	113	131		3570000	0	0	0	0	0	0	0	0	0	0	0	0	0
P21107	Tropomyosin alpha-3 chain	Tpm3	Q.LVEEELDRA.Q	95	103		6850000	17700000	21300000	18500000	18300000	19400000	15100000	0	0	0	0	0	0	0
P21107	Tropomyosin alpha-3 chain	Tpm3	V.EEELDRAQERLATALQKLEEAEKAADESERGMKVI.E	97	131		3680000	0	0	0	0	0	0	0	0	0	0	0	0	0
P21107	Tropomyosin alpha-3 chain	Tpm3	A.TALQKLEEAEKAADESERGM(+15.99)KVI.E	109	131	Oxidation (M)	36800000	14600000	9640000	4450000	0	0	0	0	0	0	0	0	0	0
P21107	Tropomyosin alpha-3 chain	Tpm3	T.ALQKLEEAEKAADESERGMK.V	110	129		0	4680000	0	0	0	0	0	0	0	0	0	0	0	0
P21107	Tropomyosin alpha-3 chain	Tpm3	A.TALQKLEEAEKAADESERGM.K	109	128		0	0	0	3710000	0	0	0	0	0	0	0	0	0	0
P21107	Tropomyosin alpha-3 chain	Tpm3	R.LATALQKLEEAEKAAD.E	107	122		7570000	0	0	0	0	0	0	0	0	0	0	0	0	0
P21107	Tropomyosin alpha-3 chain	Tpm3	A.LQKLEEAEKAADESERGMK.V	111	129		28100000	17300000	18600000	1100000	2630000	3410000	0	34200000	5460000	3770000	0	0	0	0
P21107	Tropomyosin alpha-3 chain	Tpm3	R.LATALQKLEEAEKAADESER.G	107	126		46300000	8700000	8880000	4350000	4350000	1910000	0	28500000	5150000	0	0	0	0	0
P21107	Tropomyosin alpha-3 chain	Tpm3	T.ALQKLEEAEKAADESERGMKVI.E	110	131		6370000	0	1290000	0	0	0	0	0	1330000	0	0	0	0	0
P21107	Tropomyosin alpha-3 chain	Tpm3	A.TALQKLEEAEKAADESER.G	109	126		31200000	23200000	20900000	17600000	17200000	16400000	17100000	54900000	44600000	32000000	21800000	19800000	23000000	4940000
P21107	Tropomyosin alpha-3 chain	Tpm3	A.TALQKLEEAE.K	109	118		0	0	0	0	0	795000	2040000	0	0	0	445000	2310000	0	0
P21107	Tropomyosin alpha-3 chain	Tpm3	A.LQKLEEAEKAADESER.G	111	126		5840000	0	0	0	0	0	0	7550000	1190000	5510000	0	0	0	0
P21107	Tropomyosin alpha-3 chain	Tpm3	K.KMQMLKLDK.E	8	16		3540000	0	0	0	0	0	0	0	0	0	0	0	0	0
P21107	Tropomyosin alpha-3 chain	Tpm3	V.EEELDRAQERLATALQKLEEAEKA.A	97	120		307000000	74000000	36500000	2430000	1130000	0	0	29000000	0	0	0	0	0	0
P21107	Tropomyosin alpha-3 chain	Tpm3	L.QKLEEAEKAA.D	112	121		0	0	0	4480000	631000	0	0	0	0	0	0	0	0	0
P21107	Tropomyosin alpha-3 chain	Tpm3	N.RRIQLVEEELDRAQER.L	91	106		3570000	0	0	0	0	0	0	0	0	0	0	0	0	0
P21107	Tropomyosin alpha-3 chain	Tpm3	K.EAETRAEFAERSVAKLEK.T	235	252		17800000	4500000	4530000	0	0	0	0	0	0	0	0	0	0	0
P21107	Tropomyosin alpha-3 chain	Tpm3	V.EEELDRAQERLATA.L	97	110		2220000	0	0	0	0	0	0	0	0	0	0	0	0	0
P21107	Tropomyosin alpha-3 chain	Tpm3	R.RIQLVEEELDRA.Q	92	103		7590000	2050000	1410000	0	0	0	0	3770000	0	0	0	0	0	0
P21107	Tropomyosin alpha-3 chain	Tpm3	L.ATALQKLEEAEK.A	108	119		0	0	3180000	0	0	0	0	0	0	0	0	0	0	0
P21107	Tropomyosin alpha-3 chain	Tpm3	A.SLNRRIQLV.E	88	96		0	437000	0	0	0	0	0	891000	0	572000	592000	489000	0	0
P21107	Tropomyosin alpha-3 chain	Tpm3	A.TALQKLEEAEKAADESERGMKVI.E	109	131		50900000	111000000	71000000	32500000	10800000	1710000	5160000	65200000	5800000	0	0	0	0	0
P21107	Tropomyosin alpha-3 chain	Tpm3	R.RIQLVEEELDRAQERLA.T	92	108		7270000	0	0	0	0	0	0	0	0	0	0	0	0	0
P21107	Tropomyosin alpha-3 chain	Tpm3	R.IQLVEEELDRAQERLAT.A	93	109		2080000	0	0	0	0	0	0	0	0	0	0	0	0	0
P21107	Tropomyosin alpha-3 chain	Tpm3	Q.ERLATALQKLEEAEKAA.D	105	121		1200000	0	0	0	0	0	0	0	0	0	0	0	0	0
P21107	Tropomyosin alpha-3 chain	Tpm3	V.EEELDRAQERLATALQKLEEAEKAADESERGM(+15.99)K.V	97	129	Oxidation (M)	3040000	0	0	0	0	0	0	0	0	0	0	0	0	0
P21107	Tropomyosin alpha-3 chain	Tpm3	V.EEELDRAQERLATALQK.L	97	113		8480000	1390000	0	0	0	0	0	0	0	422000	0	0	0	0
P21107	Tropomyosin alpha-3 chain	Tpm3	E.EELDRAQERL.A	98	107		3480000	1220000	4310000	10100000	1120000	0	11400000	4570000	4790000	0	1660000	0	1600000	0
P21107	Tropomyosin alpha-3 chain	Tpm3	R.LATALQKLEEAEK.A	107	119		83900000	84700000	84400000	63200000	48600000	14400000	22400000	44600000	17200000	4940000	762000	0	737000	1060000
P21107	Tropomyosin alpha-3 chain	Tpm3	R.IQLVEEELDRAQERLATA.L	93	110		1300000	0	0	0	0	0	0	0	0	0	0	0	0	0
P21107	Tropomyosin alpha-3 chain	Tpm3	A.TALQKLEEAEKAADESERGMKV.I	109	130		93700000	43200000	41500000	22000000	0	2190000	0	49500000	7420000	0	0	0	0	0
P21107	Tropomyosin alpha-3 chain	Tpm3	R.AQERLATALQKLEEAEKA.A	103	120		0	0	0	0	0	0	0	0	0	0	0	0	0	0
P13542	Myosin-8	Myh8	A.IFGEAAPYLR.K	11	20		292000000	282000000	244000000	207000000	155000000	0	98600000	229000000	228000000	0	171000000	161000000	137000000	65400000
P13542	Myosin-8	Myh8	K.TKLEQQV.D	1028	1034		99500000	115000000	117000000	103000000	121000000	105000000	106000000	124000000	124000000	165000000	154000000	156000000	150000000	181000000
P13542	Myosin-8	Myh8	R.LQAAEEHVEAV.N	1400	1410		154000000	131000000	129000000	105000000	90500000	77600000	56200000	121000000	98600000	96400000	69300000	51100000	0	24500000
P13542	Myosin-8	Myh8	I.FGEAAPYLRK.S	12	21		251000000	219000000	194000000	189000000	187000000	167000000	142000000	181000000	151000000	131000000	120000000	97600000	73100000	20100000
P13542	Myosin-8	Myh8	I.FGEAAPYLR.K	12	20		798000000	787000000	719000000	715000000	689000000	627000000	547000000	853000000	822000000	747000000	651000000	580000000	500000000	340000000
P13542	Myosin-8	Myh8	K.AKTKLEQQV.D	1026	1034		99300000	138000000	47900000	87800000	87100000	49400000	55600000	0	0	0	0	0	0	0
P13542	Myosin-8	Myh8	V.KEDQVFPMNPPKYDKIEDMA.M	75	94		121000000	103000000	121000000	71600000	82600000	94500000	87000000	118000000	107000000	103000000	101000000	63200000	97600000	82300000
P13542	Myosin-8	Myh8	R.LQAAEEHV.E	1400	1407		15900000	30100000	31100000	26300000	49000000	46200000	41900000	24700000	38100000	32800000	50600000	49800000	39000000	29500000
P13542	Myosin-8	Myh8	V.KEDQVFPMN.P	75	83		53300000	55800000	58600000	57600000	47700000	58500000	57100000	64500000	54800000	68100000	61100000	59900000	63300000	48000000
P13542	Myosin-8	Myh8	K.TSVFVAEPK.E	38	46		45200000	54700000	57600000	45700000	36100000	17400000	13600000	24500000	67700000	7640000	3970000	780000	0	0
P13542	Myosin-8	Myh8	R.LQAAEEHVEAVN.A	1400	1411		51400000	48000000	42800000	34900000	28300000	23500000	12100000	10800000	21300000	11000000	13500000	6910000	0	2880000
P13542	Myosin-8	Myh8	V.SELKSKEEEQQRLI.N	1260	1273		31100000	50900000	37100000	38000000	49100000	13100000	51600000	29500000	19900000	8020000	3440000	0	0	0
P13542	Myosin-8	Myh8	A.IFGEAAPYLRK.S	11	21		27800000	39400000	28500000	18500000	18100000	15600000	21500000	28800000	22900000	10600000	6840000	6110000	4420000	1510000
P13542	Myosin-8	Myh8	L.EDQVSELKSKEEEQQRLI.N	1256	1273		25300000	27100000	23900000	16700000	15800000	15600000	14800000	16000000	16300000	12800000	14200000	9360000	5190000	4310000
P13542	Myosin-8	Myh8	S.VFVAEPK.E	40	46		6470000	13000000	13700000	14900000	17300000	14800000	14300000	9460000	18300000	20700000	18100000	18300000	19900000	16000000
P13542	Myosin-8	Myh8	V.DDLEGSLEQEKK.L	1035	1046		23700000	47200000	67100000	72300000	77800000	97400000	108000000	67400000	108000000	137000000	168000000	191000000	237000000	273000000
P13542	Myosin-8	Myh8	R.LQTEAGEYSR.Q	1283	1292		27800000	15500000	13900000	16700000	13900000	12600000	5580000	13900000	17200000	15700000	9060000	13400000	5820000	4310000
P13542	Myosin-8	Myh8	K.TSVFVAEPKES.Y	38	48		19300000	24600000	23400000	22900000	18500000	12400000	6710000	25400000	0	8060000	3010000	0	1580000	0
P13542	Myosin-8	Myh8	V.KEDQVFPMNPPKYDKIEDMAM.M	75	95		0	15500000	14400000	22200000	30800000	38000000	37500000	5820000	25600000	24500000	29000000	36100000	33200000	30900000
P13542	Myosin-8	Myh8	K.LEQQVDDLEGSLEQEKK.L	1030	1046		4810000	0	10100000	13000000	20600000	18000000	14400000	20700000	20300000	27300000	39400000	33500000	28200000	37600000
P13542	Myosin-8	Myh8	T.SVFVAEPK.E	39	46		5870000	12800000	13400000	15200000	12100000	17400000	13900000	8670000	12000000	13400000	12800000	13000000	8390000	6340000
P13542	Myosin-8	Myh8	S.VFVAEPKES.Y	40	48		21500000	15900000	30200000	25800000	21600000	19300000	18500000	21600000	15700000	19600000	11100000	13300000	13400000	12100000
P13542	Myosin-8	Myh8	K.TKLEQQVDDLEGSLEQEKK.L	1028	1046		10300000	16900000	24500000	33800000	16600000	30000000	71000000	29900000	59200000	66700000	74500000	74500000	76300000	60700000
P13542	Myosin-8	Myh8	A.EEDKVNTLTKAK.T	1016	1027		21100000	74600000	0	0	0	7090000	0	0	0	0	0	0	0	0
P13542	Myosin-8	Myh8	V.KEDQVFPM(+15.99)NPPKYDKIEDMA.M	75	94		16200000	22000000	21400000	8690000	28200000	18700000	26900000	9950000	30300000	18800000	13700000	8030000	2980000	6080000
P13542	Myosin-8	Myh8	R.TLEDQVSELKSKEEEQQRLI.N	1254	1273		318000000	244000000	183000000	178000000	94800000	105000000	62200000	207000000	109000000	55400000	23400000	12100000	0	0
P13542	Myosin-8	Myh8	K.TKLEQQVDDLEGSLEQEK.K	1028	1045		5690000	2810000	6270000	6060000	31600000	2840000	2170000	9920000	13700000	24000000	24600000	22000000	20400000	16300000
P13542	Myosin-8	Myh8	R.IEAQNKPFDAK.T	27	37		10300000	9860000	11600000	4930000	9670000	9200000	8280000	6780000	6700000	8500000	7410000	6370000	5660000	5720000
P13542	Myosin-8	Myh8	A.AEEHVEAV.N	1403	1410		0	5210000	3910000	4960000	7320000	6830000	6820000	7240000	7670000	9040000	8490000	12200000	10300000	11100000
P13542	Myosin-8	Myh8	R.DLEEATLQHEATAAALRKK.H	1180	1198		36300000	0	1960000	0	0	0	0	0	0	0	0	0	0	0
P13542	Myosin-8	Myh8	K.SKEEEQQRLI.N	1264	1273		18000000	18800000	9750000	17300000	22400000	21400000	24300000	12900000	18700000	5030000	7380000	1340000	0	0
P13542	Myosin-8	Myh8	L.RMDLER.A	1048	1053		9330000	0	4040000	0	0	4440000	0	0	0	33200000	23500000	0	0	0
P13542	Myosin-8	Myh8	L.STELFK.V	1481	1486		0	2080000	4480000	5400000	7610000	8680000	9130000	778000	0	0	885000	0	0	0
P13542	Myosin-8	Myh8	T.LEDQVSELK.S	1255	1263		0	0	0	0	10900000	8240000	10300000	3070000	5660000	2080000	4670000	12900000	1900000	1710000
P13542	Myosin-8	Myh8	Q.AAEEHVEAV.N	1402	1410		0	8940000	11200000	18200000	10300000	8020000	12600000	0	0	0	0	0	0	0
P13542	Myosin-8	Myh8	A.TLQHEATAAALR.K	1185	1196		10100000	8690000	6800000	7360000	9830000	11700000	8800000	4310000	0	4060000	3730000	0	898000	0
P13542	Myosin-8	Myh8	T.SVFVAEPKES.Y	39	48		4170000	6600000	6470000	0	10000000	9460000	10200000	4110000	3970000	0	0	0	0	0
P13542	Myosin-8	Myh8	D.LEEATLQHEATAA.A	1181	1193		7910000	3070000	3150000	3250000	1710000	0	0	0	3280000	2070000	9810000	3490000	2160000	2240000
P13542	Myosin-8	Myh8	R.LQDLVDKLQ.A	1867	1875		2650000	5340000	6680000	6460000	9560000	10700000	10000000	2510000	0	17200000	6130000	4130000	19200000	6810000
P13542	Myosin-8	Myh8	D.LEGSLEQEKK.L	1037	1046		38500000	0	0	0	15800000	0	0	0	0	0	0	0	0	0
P13542	Myosin-8	Myh8	R.DLEEATLQHEATAAALR.K	1180	1196		15800000	10200000	8430000	7080000	7680000	3750000	1630000	3520000	1480000	0	0	0	0	0
P13542	Myosin-8	Myh8	T.LEDQVSELKSKEEEQQRLI.N	1255	1273		6090000	7560000	2980000	6170000	7620000	7970000	6440000	6260000	717000	0	0	0	0	0
P13542	Myosin-8	Myh8	R.LQDLVDKLQAK.V	1867	1877		108000000	127000000	118000000	127000000	135000000	132000000	131000000	141000000	163000000	154000000	155000000	135000000	127000000	125000000
P13542	Myosin-8	Myh8	R.DLEEATLQHEATAA.A	1180	1193		156000000	47600000	39300000	12300000	6470000	1900000	1330000	5310000	3530000	571000	0	0	0	0
P13542	Myosin-8	Myh8	K.ELEEKMV.T	875	881		4690000	3850000	3960000	2920000	3290000	2040000	2120000	4160000	2660000	1670000	0	0	1810000	0
P13542	Myosin-8	Myh8	R.TLEDQVSELKSKEEEQQRLIN.E	1254	1274		23400000	8930000	5290000	0	1100000	0	0	3180000	0	0	0	0	0	0
P13542	Myosin-8	Myh8	V.KEDQVFPMNPPKYDKIEDMAMMT.H	75	97		16600000	7950000	11000000	0	0	0	0	0	0	0	0	0	0	0
P13542	Myosin-8	Myh8	H.IHELEKIK.K	1526	1533		3110000	3960000	3360000	0	0	0	0	6580000	4500000	0	0	0	0	0
P13542	Myosin-8	Myh8	A.TLQHEATAA.A	1185	1193		30300000	0	0	0	0	0	0	0	0	0	0	0	0	0
P13542	Myosin-8	Myh8	R.TLEDQVSELKSKEEEQQR.L	1254	1271		70000000	84200000	83300000	64300000	62500000	40000000	43200000	94200000	63100000	78000000	52500000	25600000	29600000	9920000
P13542	Myosin-8	Myh8	G.VLYNLKER.Y	104	111		2210000	2880000	1670000	1200000	1350000	0	0	5700000	2270000	0	0	0	0	0
P13542	Myosin-8	Myh8	R.RDLEEATLQHEATAA.A	1179	1193		20700000	0	5330000	0	0	0	0	0	0	0	0	0	0	0
P13542	Myosin-8	Myh8	R.TLEDQVSELKS.K	1254	1264		0	0	795000	2090000	1560000	1950000	2600000	0	2590000	299000	2610000	2710000	4640000	2330000
P13542	Myosin-8	Myh8	R.TLEDQVSELKSK.E	1254	1265		11300000	16200000	9360000	10500000	11100000	9290000	11900000	2100000	6510000	6450000	8190000	8870000	6750000	4060000
P13542	Myosin-8	Myh8	I.FGEAAPYLRKSEK.E	12	24		10500000	10100000	13500000	19600000	15200000	16000000	27000000	0	7060000	1210000	2780000	6800000	0	3760000
P13542	Myosin-8	Myh8	V.KEDQVFPMNPPK.Y	75	86		0	9570000	0	0	0	0	0	0	1620000	0	3500000	10100000	14000000	19400000
P13542	Myosin-8	Myh8	R.LQDLVDKLQA.K	1867	1876		0	0	0	343000	0	3580000	0	1780000	11600000	5540000	13400000	10100000	13300000	5890000
P13542	Myosin-8	Myh8	E.DQVSELKSKEEEQQRLI.N	1257	1273		0	0	0	1490000	3000000	7470000	6780000	0	0	0	0	0	0	0
P13542	Myosin-8	Myh8	T.LEDQVSELKSKEEEQQR.L	1255	1271		2460000	7890000	1660000	2750000	3310000	4630000	7530000	2720000	3820000	0	5590000	0	1780000	0
P13542	Myosin-8	Myh8	V.KEDQVFPMNPPKYDKIE.D	75	91		0	2970000	0	3450000	1550000	0	3480000	0	0	0	0	0	2750000	13700000
P13542	Myosin-8	Myh8	K.KALQEAHQQTLDDLQAEEDKVNTLTKAK.T	1000	1027		7750000	0	0	0	0	0	0	0	0	0	0	0	0	0
P13542	Myosin-8	Myh8	L.QDLVDKLQAK.V	1868	1877		417000	0	0	1020000	1620000	1480000	816000	1640000	804000	2090000	1520000	2210000	2480000	0
P13542	Myosin-8	Myh8	S.KEEEQQRLI.N	1265	1273		0	0	0	2620000	2910000	8580000	17800000	0	0	0	0	0	0	0
P13542	Myosin-8	Myh8	G.VLYNLKE.R	104	110		0	988000	738000	944000	809000	722000	0	2130000	1710000	1460000	1510000	1400000	618000	0
P13542	Myosin-8	Myh8	K.TKLEQQVDDLEGSLEQEKKLR.M	1028	1048		260000000	192000000	171000000	141000000	181000000	109000000	67900000	200000000	102000000	70600000	19000000	12500000	1480000	929000
P13542	Myosin-8	Myh8	R.TLEDQVSELK.S	1254	1263		10300000	18800000	21200000	17600000	16200000	16300000	20000000	14400000	19300000	22100000	26000000	28600000	30600000	32400000
P13542	Myosin-8	Myh8	Q.VDDLEGSLEQEKK.L	1034	1046		0	0	0	0	3630000	0	0	0	0	0	0	3980000	0	3420000
P13542	Myosin-8	Myh8	E.MAIFGEAAPYLR.K	9	20		0	0	0	0	0	692000	0	1880000	1640000	1230000	2880000	1310000	1030000	0
P13542	Myosin-8	Myh8	A.TLQHEATAAALRKK.H	1185	1198		55500000	0	0	0	0	0	0	0	0	0	0	0	0	0
P13542	Myosin-8	Myh8	K.TKLEQQVDDLEGSLEQEKKL.R	1028	1047		0	0	1740000	1910000	2470000	666000	1600000	5790000	4810000	7210000	5220000	1330000	780000	0
P13542	Myosin-8	Myh8	E.DQVSELKSKEEEQQR.L	1257	1271		0	0	0	4720000	832000	0	1540000	0	0	1550000	0	0	0	0
P13542	Myosin-8	Myh8	R.LQAAEEHVEAVNAKC(+57.02)ASLEKTK.Q	1400	1421	Carbamidomethylation	4610000	0	0	0	0	0	0	0	0	0	0	0	0	0
P13542	Myosin-8	Myh8	R.TLEDQVSELKSKEE.E	1254	1267		2270000	0	0	2550000	0	0	0	0	0	0	0	0	0	0
P13542	Myosin-8	Myh8	K.ALQEAHQQTLDDLQAEEDKVNTLTKAK.T	1001	1027		8530000	5460000	6840000	0	5430000	0	0	1060000	0	0	0	0	0	0
P13542	Myosin-8	Myh8	M.AIFGEAAPYLR.K	10	20		5830000	4770000	4120000	3930000	4310000	2750000	2310000	2190000	0	1420000	1710000	1250000	1370000	0
P13542	Myosin-8	Myh8	K.AKTKLEQQVDDLEGSLEQEKKLR.M	1026	1048		52900000	15400000	6580000	3730000	2710000	6810000	0	2160000	2280000	1570000	0	0	0	0
P13542	Myosin-8	Myh8	V.KEDQVFPMNPPKYDK.I	75	89		0	0	0	0	0	0	2050000	0	0	0	0	0	0	4380000
P13542	Myosin-8	Myh8	I.FGEAAPYL.R	12	19		0	0	0	0	0	0	0	0	668000	655000	1020000	1190000	0	2650000
P13542	Myosin-8	Myh8	V.SELKSKEEEQQRL.I	1260	1272		0	0	0	0	2440000	3660000	0	0	0	0	0	0	0	0
P13542	Myosin-8	Myh8	A.EMAIFGEAAPYLR.K	8	20		1720000	0	0	0	0	0	0	0	0	0	0	0	0	0
P13542	Myosin-8	Myh8	Q.DLVDKLQAK.V	1869	1877		0	0	0	0	1180000	1030000	1600000	0	0	0	0	0	0	0
P13542	Myosin-8	Myh8	R.LQDLVDKLQAKVK.S	1867	1879		6370000	2200000	1390000	0	0	0	0	0	0	0	0	0	0	0
P13542	Myosin-8	Myh8	I.FGEAAPYLRKSEKER.I	12	26		20300000	12700000	9980000	6650000	0	4840000	0	12200000	0	0	0	0	0	0
P13542	Myosin-8	Myh8	K.MC(+57.02)RTLEDQVSELKSKEEEQQRLI.N	1251	1273	Carbamidomethylation	0	0	0	0	0	0	0	0	0	0	0	0	0	0
P13542	Myosin-8	Myh8	D.DLEGSLEQEKK.L	1036	1046		8490000	9670000	14800000	16100000	17100000	21200000	21400000	18300000	24300000	27700000	25000000	28100000	29000000	18200000
P13542	Myosin-8	Myh8	R.DLEEATLQHEATAAALRK.K	1180	1197		2700000	0	0	0	0	0	0	0	0	0	0	0	0	0
P13542	Myosin-8	Myh8	G.VLYNLKERY.A	104	112		0	0	0	0	0	0	0	1020000	0	0	0	0	0	0
P13542	Myosin-8	Myh8	D.DLQAEEDKVNTLTKAK.T	1012	1027		5490000	3210000	2470000	0	0	0	0	0	0	0	0	0	0	0
P13542	Myosin-8	Myh8	I.SERLEEAGGATSA.Q	1150	1162		200000000	209000000	228000000	187000000	143000000	97800000	59500000	164000000	101000000	0	6970000	19000000	6350000	5210000
P13542	Myosin-8	Myh8	R.DLEEATLQHEAT.A	1180	1191		249000000	228000000	232000000	185000000	114000000	66000000	28900000	107000000	16500000	15400000	10400000	2550000	0	973000
P13542	Myosin-8	Myh8	R.TKYETDAIQR.T	1376	1385		155000000	247000000	209000000	257000000	205000000	391000000	248000000	299000000	301000000	442000000	570000000	387000000	183000000	429000000
P13542	Myosin-8	Myh8	A.EEHVEAV.N	1404	1410		24400000	49300000	48700000	65100000	64700000	84100000	80300000	46300000	81200000	151000000	118000000	133000000	198000000	169000000
P13542	Myosin-8	Myh8	R.IEELEEEIEAER.A	1118	1129		52400000	242000000	212000000	128000000	150000000	105000000	98000000	121000000	213000000	303000000	305000000	273000000	254000000	194000000
P13542	Myosin-8	Myh8	I.SERLEEAGGA.T	1150	1159		0	25700000	31900000	43000000	37800000	28800000	47400000	32700000	59400000	75600000	86100000	99900000	99900000	88500000
P13542	Myosin-8	Myh8	A.EERADIAES.Q	1910	1918		30100000	46600000	63300000	95000000	66600000	78600000	77200000	22900000	49100000	33600000	24900000	25300000	11200000	0
P13542	Myosin-8	Myh8	R.TKYETDAIQRT.E	1376	1386		202000000	169000000	296000000	252000000	304000000	277000000	225000000	180000000	164000000	84800000	118000000	139000000	109000000	55300000
P13542	Myosin-8	Myh8	R.KLEGDLKLA.Q	1057	1065		230000000	184000000	149000000	137000000	126000000	123000000	111000000	120000000	62300000	32200000	5960000	5900000	0	7270000
P13542	Myosin-8	Myh8	A.EEDKVNTLTK.A	1016	1025		84600000	220000000	159000000	165000000	249000000	278000000	218000000	149000000	134000000	95900000	93200000	51900000	50900000	4290000
P13542	Myosin-8	Myh8	N.LLQAEIEELR.A	1683	1692		0	15300000	17500000	1920000	4600000	30300000	32400000	733000	110000000	118000000	124000000	99800000	1670000	0
P13542	Myosin-8	Myh8	R.TKYETDAIQRTEELEEAKKK.L	1376	1395		445000000	289000000	256000000	151000000	70700000	34400000	10500000	337000000	119000000	47400000	18700000	8580000	0	1340000
P13542	Myosin-8	Myh8	A.RIEELEEEIEAERA.S	1117	1130		15900000	55200000	52600000	46500000	98800000	89600000	71200000	89800000	140000000	99000000	107000000	100000000	78900000	60900000
P13542	Myosin-8	Myh8	R.ANLLQAEIEELRAT.L	1681	1694		43800000	0	47500000	35700000	24400000	12700000	8480000	56700000	46600000	33700000	34000000	0	16600000	3890000
P13542	Myosin-8	Myh8	R.DLEEATLQHEATA.A	1180	1192		90200000	64700000	68100000	49000000	29300000	16400000	8000000	30400000	9680000	7200000	0	0	0	0
P13542	Myosin-8	Myh8	K.HADSVAELGEQIDNLQR.V	1199	1215		218000000	170000000	147000000	122000000	79900000	84200000	54400000	67900000	53300000	37900000	16000000	12500000	2350000	4140000
P13542	Myosin-8	Myh8	S.RHDC(+57.02)DLLR.E	1340	1347	Carbamidomethylation	65200000	58400000	68500000	74600000	94000000	88000000	79700000	2950000	28500000	0	0	1690000	0	0
P13542	Myosin-8	Myh8	F.GEAAPYLR.K	13	20		15800000	17600000	31700000	32100000	47700000	50400000	55200000	7260000	14100000	19400000	0	26200000	33800000	31100000
P13542	Myosin-8	Myh8	K.NALAHALQS.S	1330	1338		17700000	29900000	32500000	32300000	41900000	55500000	40200000	23900000	30300000	31700000	25000000	15900000	10100000	2960000
P13542	Myosin-8	Myh8	R.MDLERAK.R	1049	1055		382000000	0	9850000	0	0	0	0	0	0	0	0	0	0	0
P13542	Myosin-8	Myh8	R.KIAEQELL.D	1703	1710		165000000	31700000	48100000	87300000	356000000	166000000	54600000	0	346000000	397000000	187000000	482000000	267000000	57200000
P13542	Myosin-8	Myh8	N.SEVAQWR.T	1369	1375		28800000	32000000	6960000	27000000	23100000	26200000	19600000	39800000	29100000	25600000	21700000	18900000	17900000	11300000
P13542	Myosin-8	Myh8	I.SERLEEAGGAT.S	1150	1160		142000000	9420000	244000000	43700000	36900000	581000000	85600000	0	16200000	320000000	366000000	409000000	306000000	0
P13542	Myosin-8	Myh8	R.IEELEEEIEAERASRAK.A	1118	1134		128000000	86100000	84600000	62600000	28200000	10700000	28700000	63700000	40700000	42500000	42300000	40400000	34300000	28100000
P13542	Myosin-8	Myh8	N.ALAHALQSSR.H	1331	1340		52700000	36900000	39600000	28400000	33600000	23200000	12300000	196000000	302000000	25900000	295000000	3380000	237000000	0
P13542	Myosin-8	Myh8	E.EEIEAERA.S	1123	1130		0	7110000	0	17900000	23300000	45300000	39300000	0	18000000	29800000	21700000	52100000	23600000	54200000
P13542	Myosin-8	Myh8	A.RIEELEEEI.E	1117	1125		0	8590000	13300000	23100000	31500000	48700000	61600000	0	9540000	0	21900000	24100000	34800000	53400000
P13542	Myosin-8	Myh8	K.ANSEVAQWR.T	1367	1375		38900000	21600000	27900000	23200000	18400000	14200000	8780000	28500000	18100000	14700000	6780000	4580000	2570000	0
P13542	Myosin-8	Myh8	D.LQAEEDKV.N	1013	1020		10500000	13100000	3610000	23400000	8340000	21400000	17800000	27100000	12100000	24100000	17600000	29300000	32500000	27900000
P13542	Myosin-8	Myh8	R.IEELEEEIEAERAS.R	1118	1131		13400000	11900000	14400000	2530000	14700000	13300000	10000000	19000000	26800000	29000000	27600000	30100000	27400000	12700000
P13542	Myosin-8	Myh8	A.ELGEQIDNLQRVK.Q	1205	1217		19900000	59500000	53300000	69600000	43400000	82800000	105000000	34700000	21700000	11700000	4550000	1580000	0	0
P13542	Myosin-8	Myh8	K.YETDAIQR.T	1378	1385		18300000	23800000	36500000	39500000	40300000	37700000	39300000	24900000	23000000	29600000	26800000	0	27000000	8480000
P13542	Myosin-8	Myh8	G.EAAPYLR.K	14	20		8440000	16400000	24900000	30500000	35400000	34400000	36700000	4870000	4940000	3670000	4530000	4790000	6230000	3470000
P13542	Myosin-8	Myh8	A.SLEHEEGKILR.I	1553	1563		20700000	29700000	34300000	29000000	22700000	18400000	16800000	0	14900000	29800000	7020000	24600000	16600000	9590000
P13542	Myosin-8	Myh8	D.LEGSLEQEK.K	1037	1045		32800000	31400000	21700000	23900000	19400000	22600000	18700000	32700000	29800000	23400000	26600000	18800000	20800000	18200000
P13542	Myosin-8	Myh8	N.ALAHALQS.S	1331	1338		18600000	5800000	6130000	19600000	8330000	10100000	12800000	10700000	13400000	14200000	31400000	13200000	22400000	22800000
P13542	Myosin-8	Myh8	K.VGNEYVTK.G	409	416		0	0	4350000	0	113000000	0	0	0	11800000	42100000	7560000	0	0	0
P13542	Myosin-8	Myh8	A.ELGEQIDNLQR.V	1205	1215		44400000	66100000	73600000	94000000	107000000	116000000	122000000	96200000	126000000	141000000	150000000	144000000	143000000	129000000
P13542	Myosin-8	Myh8	A.NSEVAQWR.T	1368	1375		10700000	39800000	22600000	11400000	12600000	38900000	20200000	5070000	20100000	0	8700000	0	0	0
P13542	Myosin-8	Myh8	A.RIEELEEEIEAER.A	1117	1129		18700000	42700000	64000000	72200000	76600000	61300000	58700000	41300000	91600000	86200000	86900000	89900000	77500000	77100000
P13542	Myosin-8	Myh8	R.SDLSRELEEI.S	1140	1149		443000000	481000000	393000000	100000000	316000000	283000000	206000000	366000000	203000000	112000000	53400000	27500000	21000000	23000000
P13542	Myosin-8	Myh8	D.AIQRTEELEEAKKK.L	1382	1395		32600000	31900000	13700000	10700000	9300000	0	0	9370000	0	0	0	0	0	0
P13542	Myosin-8	Myh8	R.VQLLHTQNT.S	1716	1724		4220000	28700000	4940000	27400000	11800000	33900000	22100000	7840000	20100000	10700000	12600000	7660000	5970000	6590000
P13542	Myosin-8	Myh8	E.EAEERADIAES.Q	1908	1918		7300000	73500000	4880000	67400000	0	0	0	7230000	8590000	7040000	0	0	0	0
P13542	Myosin-8	Myh8	L.EEEIEAERA.S	1122	1130		0	38200000	0	42700000	12300000	58600000	12400000	0	0	26300000	0	0	0	0
P13542	Myosin-8	Myh8	L.EEEIEAERASR.A	1122	1132		3060000	29000000	44700000	44400000	24200000	22000000	13200000	19500000	14800000	27900000	0	0	0	9030000
P13542	Myosin-8	Myh8	R.DLEEATLQHEA.T	1180	1190		20600000	21500000	22000000	16100000	14700000	9420000	7120000	9330000	5410000	5380000	0	0	8610000	11800000
P13542	Myosin-8	Myh8	K.NALAHALQSS.R	1330	1339		333000	26600000	3010000	4490000	7070000	7710000	5220000	707000	9820000	27400000	957000	6850000	3580000	21400000
P13542	Myosin-8	Myh8	I.SERLEEAGGATS.A	1150	1161		8870000	12500000	12900000	8490000	10700000	15300000	10700000	10100000	14500000	10000000	15700000	8370000	4850000	1980000
P13542	Myosin-8	Myh8	K.ALQEAHQQTLD.D	1001	1011		7470000	8460000	28000000	10800000	22100000	20400000	14000000	0	8440000	7120000	8420000	6500000	4520000	0
P13542	Myosin-8	Myh8	M.IDVERT.N	1433	1438		0	0	0	7880000	0	6860000	8460000	0	0	11400000	17200000	20300000	23200000	57300000
P13542	Myosin-8	Myh8	T.QQIEELKR.Q	1313	1320		0	7690000	0	7770000	0	0	0	19400000	13500000	20800000	18300000	25700000	22400000	0
P13542	Myosin-8	Myh8	R.TKYETDAI.Q	1376	1383		13900000	42000000	32700000	53000000	62900000	69500000	62700000	46200000	78900000	76200000	110000000	122000000	114000000	104000000
P13542	Myosin-8	Myh8	A.SLEHEEGKIL.R	1553	1562		8650000	16600000	15500000	17300000	20800000	28000000	34400000	13200000	18400000	23100000	30100000	33600000	33600000	29800000
P13542	Myosin-8	Myh8	K.KMEGDLNEMEI.Q	1620	1630		21000000	18900000	20100000	15100000	3330000	12200000	10900000	11500000	8870000	0	7720000	5790000	7860000	5380000
P13542	Myosin-8	Myh8	A.RIEELEEEIEAERASRAK.A	1117	1134		35400000	32200000	26800000	19500000	9220000	11100000	14900000	15700000	12700000	10600000	8390000	9440000	9090000	6070000
P13542	Myosin-8	Myh8	K.ALQEAHQQTLDDLQA.E	1001	1015		11700000	17400000	31000000	35200000	23600000	37100000	36500000	13000000	18100000	22100000	17300000	17500000	12900000	9230000
P13542	Myosin-8	Myh8	K.ELQARIEELE.E	1113	1122		4540000	6030000	4170000	5690000	6240000	7750000	10100000	2880000	4980000	8270000	5580000	15900000	20800000	17200000
P13542	Myosin-8	Myh8	S.ERLEEAGGAT.S	1151	1160		0	0	9940000	0	19500000	34300000	56600000	0	0	0	0	0	0	0
P13542	Myosin-8	Myh8	K.LEGDLKLA.Q	1058	1065		17900000	15100000	15500000	12000000	15800000	19000000	15800000	28700000	8110000	4230000	3900000	3440000	4980000	2190000
P13542	Myosin-8	Myh8	K.ELQARIEELEEEIEAERASR.A	1113	1132		74700000	33200000	17700000	966000	0	0	0	33900000	3530000	1080000	0	0	0	0
P13542	Myosin-8	Myh8	R.KIAEQELLDA.S	1703	1712		0	5300000	4440000	7020000	11300000	9660000	6350000	7330000	3900000	9540000	10300000	9430000	8670000	3740000
P13542	Myosin-8	Myh8	D.LEEATLQHEAT.A	1181	1191		23700000	13500000	14500000	11000000	12700000	4880000	2200000	9170000	0	0	0	0	0	0
P13542	Myosin-8	Myh8	D.LQAEEDKVNTLTK.A	1013	1025		12000000	8470000	10200000	12900000	10700000	8120000	3870000	19000000	6620000	3450000	5120000	4310000	0	2670000
P13542	Myosin-8	Myh8	R.ELEEISERLEEAG.G	1145	1157		2600000	11000000	12200000	13200000	12200000	12800000	12800000	1080000	0	3720000	3910000	4210000	0	1160000
P13542	Myosin-8	Myh8	S.DLSRELEEI.S	1141	1149		3250000	6040000	8880000	10400000	18500000	19800000	19900000	2340000	3570000	2440000	952000	1620000	0	0
P13542	Myosin-8	Myh8	K.NALAHALQ.S	1330	1337		1210000	9690000	9520000	10200000	10900000	13000000	13500000	0	0	26100000	0	0	0	0
P13542	Myosin-8	Myh8	K.KALQEAHQQTLD.D	1000	1011		5330000	7170000	9210000	10100000	10200000	12200000	9930000	3370000	4290000	5510000	4700000	3090000	1320000	0
P13542	Myosin-8	Myh8	R.LQDLVDK.L	1867	1873		7680000	14900000	16100000	16300000	19200000	21000000	21400000	18300000	20800000	28000000	34300000	41700000	47000000	63600000
P13542	Myosin-8	Myh8	K.IAEQELLDASERV.Q	1704	1716		7830000	16700000	11200000	13500000	11100000	9240000	7460000	20300000	22200000	15500000	18600000	11300000	10300000	7330000
P13542	Myosin-8	Myh8	R.SDLSRELEEISERLEEAGGATSA.Q	1140	1162		34900000	0	0	0	0	0	0	2740000	0	0	0	0	0	0
P13542	Myosin-8	Myh8	R.ENKNLQQEI.S	1504	1512		17600000	4540000	3270000	19400000	5720000	2540000	22600000	0	2960000	0	0	0	0	0
P13542	Myosin-8	Myh8	R.LQDLVDKL.Q	1867	1874		11700000	7180000	7990000	10600000	19600000	23700000	41700000	32500000	24500000	43800000	37800000	79700000	77600000	85000000
P13542	Myosin-8	Myh8	E.AEERADIAESQV.N	1909	1920		0	0	0	6910000	13700000	0	0	0	15000000	23700000	6520000	5730000	10500000	0
P13542	Myosin-8	Myh8	D.DALRGQEDLKEQLA.I	1662	1675		10100000	7280000	9180000	9090000	12300000	14300000	18300000	4330000	8690000	5450000	6050000	5920000	4220000	2910000
P13542	Myosin-8	Myh8	K.QIQKLEAR.V	1814	1821		16300000	12300000	0	0	11100000	0	0	0	0	0	0	0	0	0
P13542	Myosin-8	Myh8	D.LSRELEEI.S	1142	1149		19100000	7950000	8150000	5520000	8200000	10700000	9740000	0	0	0	0	0	0	0
P13542	Myosin-8	Myh8	V.AELGEQIDNLQRVK.Q	1204	1217		75200000	83200000	154000000	145000000	145000000	60500000	157000000	148000000	82800000	39000000	7530000	6540000	0	0
P13542	Myosin-8	Myh8	A.DIAESQVNK.L	1914	1922		5870000	0	0	0	0	0	0	0	666000	0	13100000	30700000	2230000	24900000
P13542	Myosin-8	Myh8	N.LLQAEIEELRAT.L	1683	1694		2940000	3090000	4770000	6200000	8900000	10800000	7380000	5610000	4030000	2140000	1390000	1980000	2990000	1610000
P13542	Myosin-8	Myh8	A.NLLQAEIEELRAT.L	1682	1694		4090000	4880000	4320000	2760000	4580000	2550000	694000	6080000	122000	8650000	13400000	1240000	4780000	0
P13542	Myosin-8	Myh8	K.ELTYQTEEDRK.N	1852	1862		5740000	17900000	26600000	19800000	21700000	10000000	33000000	19000000	36900000	57700000	53700000	71000000	86200000	84200000
P13542	Myosin-8	Myh8	A.DIAESQVNKLR.V	1914	1924		91600000	131000000	122000000	141000000	126000000	113000000	109000000	103000000	88700000	69800000	50200000	30300000	19000000	13500000
P13542	Myosin-8	Myh8	L.EEISERLEEAGGAT.S	1147	1160		0	2390000	3760000	3420000	3750000	4130000	3750000	2710000	25200000	5320000	5460000	4280000	1990000	2400000
P13542	Myosin-8	Myh8	A.SLEHEEGKILRI.Q	1553	1564		41100000	33700000	30000000	25000000	22000000	16800000	9600000	13200000	20800000	11500000	8050000	1020000	0	0
P13542	Myosin-8	Myh8	K.ALQEAHQQTLDDLQAEEDKVNTLTK.A	1001	1025		23000000	37400000	43900000	35500000	17100000	8230000	3610000	33300000	3830000	5230000	2150000	4910000	0	0
P13542	Myosin-8	Myh8	K.NALAHALQSSRHDC(+57.02)DLLR.E	1330	1347		9090000	9400000	6500000	11600000	5300000	21700000	3480000	0	0	0	0	0	0	0
P13542	Myosin-8	Myh8	R.SDLSRELEEISERLEEAGGAT.S	1140	1160		27200000	0	0	0	0	0	0	2840000	0	0	0	0	0	0
P13542	Myosin-8	Myh8	L.KKEQDTSAHLER.M	1773	1784		0	29000000	19200000	0	0	0	0	0	0	12800000	0	0	0	0
P13542	Myosin-8	Myh8	R.KKHADSVAELGEQIDNLQR.V	1197	1215		43600000	19000000	58300000	42700000	37300000	26800000	13300000	31600000	35700000	11600000	6510000	837000	0	0
P13542	Myosin-8	Myh8	E.EAEERADIAESQVNKLR.V	1908	1924		38400000	22000000	12800000	13700000	2870000	3170000	0	16500000	8430000	3670000	0	0	0	0
P13542	Myosin-8	Myh8	R.KIAEQELLDASERV.Q	1703	1716		11300000	17700000	17200000	15300000	16300000	11400000	3420000	30700000	27600000	22800000	7830000	8240000	9110000	1950000
P13542	Myosin-8	Myh8	D.EEEINAELTAKKR.K	932	944		7000000	8250000	5990000	5820000	2810000	13200000	0	0	0	0	0	0	0	0
P13542	Myosin-8	Myh8	I.EELEEEIEAERA.S	1119	1130		0	1590000	2990000	5320000	4460000	5630000	5110000	1630000	4970000	4270000	4610000	3970000	3810000	3150000
P13542	Myosin-8	Myh8	R.KLEDEC(+57.02)SELKK.D	945	955	Carbamidomethylation	0	20400000	2000000	2700000	4700000	4750000	17200000	0	0	0	0	832000	1440000	0
P13542	Myosin-8	Myh8	D.DLQAEEDKVN.T	1012	1021		10200000	13000000	10900000	14500000	13300000	15900000	15200000	7250000	9060000	7590000	9900000	8590000	11200000	14700000
P13542	Myosin-8	Myh8	K.NLTEEMA.G	980	986		2880000	3830000	3720000	1310000	3600000	4690000	4800000	2690000	0	1720000	3430000	1600000	4540000	3220000
P13542	Myosin-8	Myh8	N.PPKYDKIEDMA.M	84	94		4790000	3320000	2660000	2580000	8820000	3930000	7670000	8790000	7660000	2920000	0	0	1360000	0
P13542	Myosin-8	Myh8	K.ELTYQTEEDRKN.V	1852	1863		12800000	5030000	0	6980000	334000	4320000	0	10900000	5030000	2370000	6340000	1460000	1450000	6290000
P13542	Myosin-8	Myh8	R.IEELEEEIEAERA.S	1118	1130		49600000	127000000	155000000	194000000	194000000	176000000	136000000	173000000	286000000	305000000	292000000	268000000	242000000	178000000
P13542	Myosin-8	Myh8	A.RIEELEEEIEA.E	1117	1127		0	0	0	4350000	3960000	4440000	3560000	0	2330000	2540000	2870000	5640000	5720000	9780000
P13542	Myosin-8	Myh8	D.LELTLAK.V	960	966		8890000	5640000	6540000	3170000	1500000	632000	389000	4900000	1650000	1500000	0	0	0	0
P13542	Myosin-8	Myh8	K.KALQEAHQQTLDDLQA.E	1000	1015		6820000	9060000	15000000	18900000	21500000	21700000	20500000	5990000	11500000	4850000	6990000	5460000	2760000	491000
P13542	Myosin-8	Myh8	D.LLREQYE.E	1345	1351		0	7750000	0	3600000	23700000	3490000	6290000	0	0	0	0	0	0	0
P13542	Myosin-8	Myh8	D.SVAELGEQIDNLQR.V	1202	1215		33100000	31100000	38100000	43400000	33200000	53600000	19300000	41800000	24800000	72200000	29200000	18900000	16800000	9860000
P13542	Myosin-8	Myh8	N.EVEDLMIDVERT.N	1427	1438		11700000	3310000	27200000	11800000	17600000	14600000	18100000	9220000	5550000	14600000	12600000	12600000	19100000	14300000
P13542	Myosin-8	Myh8	G.EQIDNLQR.V	1208	1215		8320000	0	0	2150000	0	9430000	2040000	0	0	4100000	0	0	6120000	0
P13542	Myosin-8	Myh8	K.KAITDAAMMAEELKKEQDTSAHLER.M	1760	1784		25600000	0	0	0	0	0	0	0	0	0	0	0	0	0
P13542	Myosin-8	Myh8	M.AEELKKEQDTSAHLER.M	1769	1784		94500000	114000000	104000000	66400000	98300000	70900000	73800000	71000000	47900000	43100000	27500000	15900000	13900000	5580000
P13542	Myosin-8	Myh8	E.LEEEIEAERA.S	1121	1130		0	0	6120000	4030000	6740000	5320000	5720000	0	0	0	3580000	2580000	2580000	5780000
P13542	Myosin-8	Myh8	T.EELEEAKKKLAQR.L	1387	1399		14500000	6020000	0	0	0	0	0	0	0	0	0	0	0	0
P13542	Myosin-8	Myh8	R.LQNEVEDLM.I	1424	1432		0	1030000	1220000	2000000	2500000	2850000	4610000	404000	1480000	1870000	3980000	3740000	6320000	8340000
P13542	Myosin-8	Myh8	L.GEQIDNLQRVK.Q	1207	1217		8580000	9710000	4180000	14800000	12800000	8430000	15800000	1350000	2610000	1440000	5440000	4590000	0	0
P13542	Myosin-8	Myh8	A.EERADIAESQVNKLR.V	1910	1924		19400000	23100000	25400000	22900000	16400000	11600000	11000000	13400000	8310000	2910000	0	0	0	0
P13542	Myosin-8	Myh8	R.IEELEEEIEAERASRAKAEKQR.S	1118	1139		26800000	1660000	0	0	0	0	0	0	0	0	0	0	0	0
P13542	Myosin-8	Myh8	L.GEQIDNLQR.V	1207	1215		2440000	11600000	11100000	14900000	16000000	24300000	44300000	4300000	12700000	17400000	26600000	19900000	22500000	24900000
P13542	Myosin-8	Myh8	E.EEINAELTAKKR.K	933	944		6230000	4280000	5740000	4030000	4390000	5320000	1000000	0	0	0	0	0	0	0
P13542	Myosin-8	Myh8	A.EELKKEQDTSAHLER.M	1770	1784		1160000000	1190000000	1190000000	946000000	865000000	897000000	841000000	993000000	776000000	731000000	592000000	475000000	289000000	191000000
P13542	Myosin-8	Myh8	A.LSKANSEVAQWR.T	1364	1375		0	2930000	0	2640000	2430000	0	2200000	4660000	4540000	4020000	3230000	2480000	3530000	3050000
P13542	Myosin-8	Myh8	R.RDLEEAT.L	1179	1185		0	13200000	13800000	18600000	25400000	21900000	28600000	18000000	43100000	39700000	41300000	23500000	37000000	27700000
P13542	Myosin-8	Myh8	K.IQLEAKI.K	916	922		6000000	5720000	3640000	2860000	2530000	990000	0	3320000	1260000	0	0	0	0	0
P13542	Myosin-8	Myh8	R.KLEGDLKL.A	1057	1064		2710000	1560000	2010000	1620000	0	1710000	1790000	4650000	4790000	5010000	3620000	3510000	2100000	0
P13542	Myosin-8	Myh8	E.LEEEIEAER.A	1121	1129		0	3430000	0	0	0	3030000	3140000	0	0	0	0	7300000	7080000	10900000
P13542	Myosin-8	Myh8	R.IEELEEEIEAERASRAKAEK.Q	1118	1137		39800000	13900000	5130000	971000	1210000	0	0	3440000	0	0	0	0	0	0
P13542	Myosin-8	Myh8	R.LQNEVEDLMIDVERTN.A	1424	1439		18800000	12200000	9650000	7370000	5510000	1520000	0	18300000	11800000	4100000	2340000	0	0	0
P13542	Myosin-8	Myh8	K.RKLEGDLKLA.Q	1056	1065		12100000	5870000	3620000	2100000	2410000	1860000	1430000	3210000	0	0	0	0	0	0
P13542	Myosin-8	Myh8	D.LEEATLQHEATA.A	1181	1192		4060000	4980000	7940000	1430000	1470000	0	833000	0	429000	0	0	0	0	0
P13542	Myosin-8	Myh8	N.EVEDLMIDVERTN.A	1427	1439		0	0	0	4380000	6260000	9700000	8270000	1580000	3800000	3240000	3190000	2990000	1930000	2020000
P13542	Myosin-8	Myh8	A.RIEELEEEIEAERAS.R	1117	1131		839000	6360000	5570000	8020000	7300000	6070000	6660000	5500000	3820000	6190000	6540000	3190000	2790000	0
P13542	Myosin-8	Myh8	D.LMIDVER.T	1431	1437		0	601000	0	0	0	836000	1130000	2260000	2190000	2320000	3960000	0	13500000	3650000
P13542	Myosin-8	Myh8	R.KLEDEC(+57.02)SELKKDIDDLELT.L	945	963		38300000	30700000	34600000	19300000	34300000	29600000	31400000	47100000	38400000	43200000	32800000	26300000	18700000	13400000
P13542	Myosin-8	Myh8	K.TPGAMEHELV.L	683	692		0	0	0	3940000	0	0	0	2120000	0	3860000	4110000	4170000	5360000	5960000
P13542	Myosin-8	Myh8	T.KYETDAI.Q	1377	1383		5310000	1260000	0	0	0	0	6750000	0	0	0	3250000	2020000	4210000	8180000
P13542	Myosin-8	Myh8	R.ELEEISERLEEAGGA.T	1145	1159		2020000	3470000	2630000	0	0	0	0	7720000	3320000	1670000	0	0	0	784000
P13542	Myosin-8	Myh8	L.EEISERLEEAGGATSA.Q	1147	1162		3350000	0	6410000	4620000	0	0	4580000	4570000	0	0	0	0	0	0
P13542	Myosin-8	Myh8	R.LDEAEQLALKGGK.K	1800	1812		24400000	30600000	36000000	37200000	35500000	35000000	27300000	45500000	50400000	49200000	30300000	30000000	19000000	14000000
P13542	Myosin-8	Myh8	V.AELGEQIDNLQRV.K	1204	1216		0	418000	0	0	4730000	6100000	4710000	2940000	2280000	4050000	3780000	5010000	3680000	3290000
P13542	Myosin-8	Myh8	K.KALQEAHQQTL.D	1000	1010		0	1170000	1430000	1960000	1830000	2320000	2980000	0	2310000	3150000	3120000	3100000	2430000	2000000
P13542	Myosin-8	Myh8	R.IEELEEEIEAERASRA.K	1118	1133		5050000	5560000	4050000	0	0	0	0	3890000	0	0	0	0	0	0
P13542	Myosin-8	Myh8	S.RHDC(+57.02)DLL.R	1340	1346		0	0	0	0	0	0	0	0	0	0	0	0	0	6000000
P13542	Myosin-8	Myh8	K.DLQHRLDEAEQL.A	1795	1806		8370000	13800000	14500000	17200000	19400000	13700000	14200000	3110000	12500000	10300000	17800000	8900000	5980000	6840000
P13542	Myosin-8	Myh8	K.NALAHALQSSR.H	1330	1340		74300000	87500000	101000000	71200000	66100000	43500000	30900000	55100000	36300000	37200000	20600000	12400000	2260000	7450000
P13542	Myosin-8	Myh8	K.HADSVAELGEQI.D	1199	1210		8540000	11400000	15500000	11700000	9300000	11000000	9060000	1980000	7560000	14000000	12500000	8020000	7890000	5140000
P13542	Myosin-8	Myh8	K.ALC(+57.02)YPR.V	401	406	Carbamidomethylation	0	2570000	0	0	1480000	2720000	0	0	3360000	6150000	5280000	0	2220000	1980000
P13542	Myosin-8	Myh8	K.AITDAAMMAEELKKEQDTSAHLER.M	1761	1784		21000000	0	2730000	0	0	0	0	0	0	0	0	0	0	0
P13542	Myosin-8	Myh8	R.RDLEEATL.Q	1179	1186		0	5140000	0	2390000	3250000	2390000	1550000	6590000	0	0	0	0	0	0
P13542	Myosin-8	Myh8	E.LEEEIEAERASR.A	1121	1132		0	8220000	5860000	6110000	6930000	2680000	2130000	0	2890000	0	0	0	0	0
P13542	Myosin-8	Myh8	G.NLEKMC(+57.02)R.T	1247	1253	Carbamidomethylation	0	4060000	8280000	3880000	0	0	1020000	0	0	0	0	0	0	0
P13542	Myosin-8	Myh8	A.DIAESQVNKL.R	1914	1923		0	5570000	0	3050000	3480000	0	0	0	5800000	0	5070000	0	1480000	816000
P13542	Myosin-8	Myh8	T.LDDLQAEEDKVN.T	1010	1021		3510000	3780000	5030000	8750000	4210000	6000000	2170000	8360000	9980000	7490000	7390000	7380000	8880000	5930000
P13542	Myosin-8	Myh8	A.SERVQLL.H	1713	1719		994000	3200000	1670000	2270000	2040000	2910000	2610000	2210000	377000	0	0	0	3350000	0
P13542	Myosin-8	Myh8	V.TERAEDEEEI.N	926	935		0	0	0	0	0	4550000	2950000	0	3600000	2160000	7010000	6200000	2060000	5150000
P13542	Myosin-8	Myh8	D.DLQAEEDKVNTLTK.A	1012	1025		23400000	54900000	55300000	77500000	79200000	56300000	31900000	38100000	46600000	58500000	47700000	32300000	27200000	18300000
P13542	Myosin-8	Myh8	A.EIEELRAT.L	1687	1694		0	0	0	0	8820000	11700000	0	0	0	0	1450000	0	0	1270000
P13542	Myosin-8	Myh8	A.EELKKEQDTSAHLE.R	1770	1783		0	0	808000	2120000	0	969000	1160000	0	5230000	5490000	6400000	0	3790000	8140000
P13542	Myosin-8	Myh8	D.IAESQVNKLR.V	1915	1924		21000000	21400000	14900000	5990000	8500000	12300000	4210000	16800000	6410000	2430000	756000	0	0	0
P13542	Myosin-8	Myh8	I.AEQELLDASERV.Q	1705	1716		0	0	0	0	9420000	0	0	2510000	0	1550000	0	4460000	1510000	2720000
P13542	Myosin-8	Myh8	I.SANPLLEAFGNAK.T	225	237		981000	0	0	1850000	1680000	2150000	3130000	1480000	995000	2560000	1410000	3200000	765000	0
P13542	Myosin-8	Myh8	K.LEDEC(+57.02)SELKKDIDDLELT.L	946	963	Carbamidomethylation	0	2570000	2170000	2420000	2070000	0	1820000	1890000	1800000	0	2100000	730000	1320000	1560000
P13542	Myosin-8	Myh8	V.DDLEGSLEQEK.K	1035	1045		20800000	30100000	24600000	39500000	33500000	48500000	56400000	20400000	45400000	38200000	58300000	72200000	85000000	101000000
P13542	Myosin-8	Myh8	K.NALAHAL.Q	1330	1336		0	0	0	2950000	0	4380000	0	0	4410000	3280000	4320000	2460000	0	0
P13542	Myosin-8	Myh8	K.IAEQELLDASERVQLLHTQNT.S	1704	1724		5250000	5660000	3980000	2390000	0	0	0	0	0	0	0	0	0	0
P13542	Myosin-8	Myh8	K.EEEQQRLI.N	1266	1273		0	2450000	0	3330000	0	0	0	0	0	2760000	5440000	1950000	2970000	2510000
P13542	Myosin-8	Myh8	R.ADIAESQVNKLR.V	1913	1924		19700000	27500000	35800000	29300000	28100000	15900000	12000000	12600000	15700000	15700000	7210000	4690000	726000	1570000
P13542	Myosin-8	Myh8	I.AESQVNKLR.V	1916	1924		3010000	3130000	3920000	1010000	6560000	4000000	3990000	0	2030000	2490000	1380000	745000	536000	1570000
P13542	Myosin-8	Myh8	V.AELGEQIDNLQR.V	1204	1215		114000000	75400000	162000000	190000000	182000000	171000000	161000000	201000000	224000000	229000000	225000000	200000000	175000000	129000000
P13542	Myosin-8	Myh8	V.AELGEQIDNLQ.R	1204	1214		0	0	4160000	0	2330000	0	0	1040000	6610000	7640000	7530000	7500000	7050000	8300000
P13542	Myosin-8	Myh8	T.LDDLQAEEDKV.N	1010	1020		0	1560000	0	4050000	5010000	7760000	13500000	2560000	7030000	6840000	14100000	19900000	26300000	26100000
P13542	Myosin-8	Myh8	K.ELQARIEELEEEIEAERASRAKAEKQR.S	1113	1139		0	0	0	0	0	0	0	0	0	0	0	0	0	0
P13542	Myosin-8	Myh8	R.ANLLQAEIEELRA.T	1681	1693		0	12700000	0	6930000	6830000	3540000	2440000	1030000	1570000	9760000	897000	1460000	0	0
P13542	Myosin-8	Myh8	K.DTQLHLDDALRGQEDLKEQLA.I	1655	1675		2200000	3930000	2090000	0	6080000	2070000	9380000	10800000	8220000	11500000	4520000	6110000	5410000	7030000
P13542	Myosin-8	Myh8	R.KKHADSVAELGEQI.D	1197	1210		948000	1370000	3910000	2290000	1820000	1350000	404000	4630000	4650000	3180000	1260000	1120000	0	0
P13542	Myosin-8	Myh8	R.ELEEISERLEEAGGATSA.Q	1145	1162		84700000	39900000	44000000	14600000	3770000	735000	117000	40100000	6510000	5800000	0	0	0	0
P13542	Myosin-8	Myh8	R.RANLLQAEIEELRAT.L	1680	1694		2310000	8180000	1970000	0	2000000	573000	0	10800000	8060000	4980000	0	0	0	0
P13542	Myosin-8	Myh8	R.KIAEQELLDASERVQLLHTQNT.S	1703	1724		6300000	6410000	1580000	2160000	0	0	0	3180000	0	0	0	0	0	0
P13542	Myosin-8	Myh8	C.DLLREQY.E	1344	1350		1030000	0	2590000	0	1660000	2160000	0	0	0	2420000	0	2150000	0	4990000
P13542	Myosin-8	Myh8	D.SVAELGEQIDNLQRVK.Q	1202	1217		58200000	48700000	37600000	52400000	18700000	24600000	13800000	22300000	9570000	0	0	0	787000	0
P13542	Myosin-8	Myh8	K.ELQARIEELEEEIEAERASRAK.A	1113	1134		53500000	3420000	11700000	1550000	0	0	0	10000000	6390000	2430000	1000000	0	0	0
P13542	Myosin-8	Myh8	A.LAHALQSSR.H	1332	1340		3050000	3260000	3160000	3170000	2030000	0	0	0	1320000	0	0	0	0	0
P13542	Myosin-8	Myh8	K.DTQLHLDDALR.G	1655	1665		0	4530000	0	420000	351000	0	574000	0	2370000	5460000	4540000	4820000	6270000	5580000
P13542	Myosin-8	Myh8	L.QAEIEELR.A	1685	1692		0	0	0	0	0	0	0	2950000	0	0	0	4510000	9440000	0
P13542	Myosin-8	Myh8	R.TEELEEAKKKLAQR.L	1386	1399		27900000	0	5720000	0	0	0	0	0	0	0	0	0	0	0
P13542	Myosin-8	Myh8	L.MIDVERT.N	1432	1438		0	0	0	0	2200000	2420000	5530000	0	0	0	0	0	4570000	1420000
P13542	Myosin-8	Myh8	K.KAITDAAMMA.E	1760	1769		22700000	11300000	13800000	13300000	5480000	2130000	4340000	12800000	7740000	14400000	5540000	7340000	0	0
P13542	Myosin-8	Myh8	K.KAITDAAM(+15.99)MAEELKKEQDTSAHLER.M	1760	1784	Oxidation (M)	4820000	0	0	0	0	0	0	0	0	0	0	0	0	0
P13542	Myosin-8	Myh8	K.KHADSVAELGEQI.D	1198	1210		0	4680000	1460000	1760000	1530000	0	0	1720000	1550000	1170000	0	0	0	0
P13542	Myosin-8	Myh8	R.ALSKANSEVAQWR.T	1363	1375		6980000	2600000	0	0	0	2390000	0	3790000	0	0	2240000	0	0	0
P13542	Myosin-8	Myh8	K.KALQEAHQQTLDDLQAEEDKVNTLTK.A	1000	1025		44700000	42800000	38200000	32400000	13900000	10400000	0	23300000	10900000	7720000	9140000	2930000	7520000	5790000
P13542	Myosin-8	Myh8	K.DLQHRLDEAEQLALKGGKK.Q	1795	1813		5200000	2140000	2230000	0	0	0	0	0	0	0	0	0	0	0
P13542	Myosin-8	Myh8	N.PLLEAFGNAK.T	228	237		0	1770000	0	0	1240000	0	0	0	0	0	0	0	0	0
P13542	Myosin-8	Myh8	K.DIDDLELT.L	956	963		0	808000	545000	692000	1310000	1570000	1590000	667000	776000	0	1010000	1400000	2340000	1600000
P13542	Myosin-8	Myh8	E.LGEQIDNLQRVK.Q	1206	1217		0	48000000	46600000	56100000	55600000	7470000	47600000	0	21400000	17900000	13800000	12300000	10200000	6090000
P13542	Myosin-8	Myh8	A.EELKKEQDTSAHLERMK.K	1770	1786		5630000	0	0	0	0	0	0	951000	0	0	0	0	0	0
P13542	Myosin-8	Myh8	V.KDLQHRLDEAEQLALKGGKK.Q	1794	1813		8260000	0	0	0	0	0	0	0	0	0	0	0	0	0
P13542	Myosin-8	Myh8	K.YETDAIQRT.E	1378	1386		32800000	49300000	37300000	65600000	85500000	82600000	94000000	43500000	27900000	32700000	18500000	12100000	34700000	16400000
P13542	Myosin-8	Myh8	R.ELEEISERLEEAGGAT.S	1145	1160		72900000	62700000	66300000	33000000	15000000	8900000	3940000	66600000	28200000	21400000	8240000	5570000	5150000	7610000
P13542	Myosin-8	Myh8	R.TKYETDAIQRTEELEEAKKKLAQR.L	1376	1399		38700000	5920000	0	0	0	0	0	0	0	0	0	0	0	0
P13542	Myosin-8	Myh8	R.HDC(+57.02)DLLR.E	1341	1347	Carbamidomethylation	107000000	108000000	128000000	42000000	158000000	153000000	145000000	25000000	123000000	135000000	181000000	214000000	135000000	159000000
P13542	Myosin-8	Myh8	K.IKELQARIEELEEEIEAERASRAK.A	1111	1134		2560000	0	0	0	0	0	0	0	0	0	0	0	0	0
P13542	Myosin-8	Myh8	K.KHADSVAELGEQIDNLQRVK.Q	1198	1217		28700000	1470000	9100000	3450000	0	0	0	0	0	0	0	0	0	0
P13542	Myosin-8	Myh8	R.IQLELNQVK.S	1564	1572		0	0	0	0	0	0	0	0	2170000	6870000	0	4310000	0	0
P13542	Myosin-8	Myh8	D.DLQAEEDKVNT.L	1012	1022		0	0	0	0	4510000	3550000	0	0	0	0	5220000	0	0	0
P13542	Myosin-8	Myh8	K.ALQEAHQQTLDDLQAEEDKV.N	1001	1020		0	0	0	0	0	3750000	4930000	0	0	0	3050000	2690000	329000	288000
P13542	Myosin-8	Myh8	T.LDDLQAEEDKVNTLTK.A	1010	1025		18300000	20100000	24900000	24000000	32600000	22500000	19100000	14000000	14200000	30100000	25600000	15400000	15600000	12100000
P13542	Myosin-8	Myh8	R.GQEDLKEQLA.I	1666	1675		0	0	0	0	0	0	22400000	15900000	3940000	2350000	6090000	2740000	32900000	10600000
P13542	Myosin-8	Myh8	K.YETDAIQRTEELEEAKKKLAQR.L	1378	1399		18000000	1130000	0	0	0	0	0	0	0	0	0	0	0	0
P13542	Myosin-8	Myh8	D.C(+57.02)DLLREQY.E	1343	1350	Carbamidomethylation	0	0	737000	2460000	1230000	1310000	3080000	0	0	2300000	1370000	0	0	0
P13542	Myosin-8	Myh8	I.EELEEEIEAERASR.A	1119	1132		4210000	3030000	4010000	7670000	0	0	0	6940000	2420000	0	0	0	0	0
P13542	Myosin-8	Myh8	D.EEEINAELTAK.K	932	942		2170000	2040000	4540000	0	0	0	0	0	0	0	0	0	0	0
P13542	Myosin-8	Myh8	R.IEELEEEI.E	1118	1125		1580000	0	6880000	9020000	19700000	31300000	40200000	1980000	10100000	14500000	13800000	14300000	24800000	28600000
P13542	Myosin-8	Myh8	K.KKMEGDLNEMEI.Q	1619	1630		6360000	6180000	4870000	4230000	4350000	4500000	3610000	4540000	4380000	6110000	3510000	5320000	2620000	4860000
P13542	Myosin-8	Myh8	R.VKELTYQTEEDRK.N	1850	1862		0	0	0	0	0	0	0	0	1450000	1540000	0	2750000	1200000	0
P13542	Myosin-8	Myh8	A.DSVAELGEQIDNLQR.V	1201	1215		846000	1720000	1500000	0	1470000	1140000	0	1130000	0	1260000	427000	0	0	0
P13542	Myosin-8	Myh8	K.MQGTLEDQII.S	215	224		0	0	0	0	0	2210000	0	0	0	2640000	0	1890000	0	3500000
P13542	Myosin-8	Myh8	A.HQQTLDDLQA.E	1006	1015		0	0	0	0	0	1240000	7560000	0	3080000	1420000	9450000	10700000	10100000	21500000
P13542	Myosin-8	Myh8	A.RIEELEEEIEAERASRAKAEK.Q	1117	1137		2720000	1400000	0	0	0	0	0	0	0	0	0	0	0	0
P13542	Myosin-8	Myh8	R.RANLLQAEIEELR.A	1680	1692		1310000	1450000	1920000	1540000	399000	0	0	2480000	3910000	5560000	2970000	2090000	491000	0
P13542	Myosin-8	Myh8	R.LQNEVEDLM(+15.99)IDVERT.N	1424	1438	Oxidation (M)	0	2400000	710000	2590000	0	0	0	0	3730000	1220000	1860000	2380000	1170000	684000
P13542	Myosin-8	Myh8	R.LQNEVEDLMID.V	1424	1434		0	0	0	8080000	1330000	0	0	0	0	0	0	0	0	0
P13542	Myosin-8	Myh8	R.HDC(+57.02)DLLREQYE.E	1341	1351	Carbamidomethylation	0	0	0	0	9370000	0	0	0	0	0	0	0	0	0
P13542	Myosin-8	Myh8	I.QRTEELEEA.K	1384	1392		0	0	0	0	0	0	0	0	0	0	0	0	5250000	4120000
P13542	Myosin-8	Myh8	V.KDLQHRLDEAEQL.A	1794	1806		26800000	54400000	48800000	61200000	65200000	64400000	62100000	45700000	24300000	12800000	6460000	4000000	3040000	0
P13542	Myosin-8	Myh8	R.IEELEEEIEAERASR.A	1118	1132		278000000	314000000	327000000	232000000	134000000	57500000	19100000	343000000	131000000	90200000	27000000	13300000	0	9680000
P13542	Myosin-8	Myh8	R.RDLEEATLQHEAT.A	1179	1191		58000000	49500000	58400000	44300000	25500000	23200000	8540000	22200000	8290000	12900000	3730000	0	3290000	3040000
P13542	Myosin-8	Myh8	K.ELTYQTEEDR.K	1852	1861		0	0	0	0	0	0	0	0	0	1290000	1400000	0	2730000	3500000
P13542	Myosin-8	Myh8	K.IAEKDEEIDQLK.R	1579	1590		0	0	0	0	0	0	0	0	2970000	1540000	1610000	1110000	0	1540000
P13542	Myosin-8	Myh8	R.LQNEVEDLM(+15.99)IDVER.T	1424	1437	Oxidation (M)	0	0	0	0	0	0	817000	0	0	0	1540000	2750000	4970000	3640000
P13542	Myosin-8	Myh8	E.EEIEAERASR.A	1123	1132		8680000	0	0	0	0	0	0	0	0	0	0	0	0	0
P13542	Myosin-8	Myh8	K.HADSVAELGEQIDNLQRVKQK.L	1199	1219		4210000	0	0	0	0	0	0	0	0	0	0	0	0	0
P13542	Myosin-8	Myh8	R.IEAQNKPFDA.K	27	36		0	0	0	0	0	2020000	0	3760000	0	0	0	2440000	0	0
P13542	Myosin-8	Myh8	A.EQELLDASERV.Q	1706	1716		0	0	0	0	0	0	0	0	0	0	1690000	1010000	2370000	1850000
P13542	Myosin-8	Myh8	E.AEERADIAESQVNKLR.V	1909	1924		4420000	2630000	9480000	2370000	3430000	1620000	0	0	0	0	0	0	0	0
P13542	Myosin-8	Myh8	K.DIDDLELTLAK.V	956	966		0	0	0	0	0	0	0	0	0	0	0	0	7780000	182000
P13542	Myosin-8	Myh8	R.LQNEVEDLMI.D	1424	1433		0	0	0	0	0	0	0	0	0	1710000	2390000	2470000	1340000	0
P13542	Myosin-8	Myh8	R.TKYETDAIQRTEELEEAKK.K	1376	1394		17500000	9610000	8870000	0	0	0	0	8050000	1980000	0	0	0	0	0
P13542	Myosin-8	Myh8	A.ELGEQIDNLQ.R	1205	1214		0	0	0	0	0	0	0	0	0	0	1210000	1430000	2080000	2820000
P13542	Myosin-8	Myh8	R.KKHADSVAELGEQIDNLQRVK.Q	1197	1217		49600000	33100000	24600000	8100000	2920000	0	0	9360000	0	0	0	0	0	0
P13542	Myosin-8	Myh8	E.LKKEQDTSAHLER.M	1772	1784		0	1480000	992000	0	0	0	0	0	0	1130000	0	0	0	0
P13542	Myosin-8	Myh8	K.IAEKDEEIDQLKR.N	1579	1591		0	0	0	0	0	0	0	0	0	7220000	0	0	0	0
P13542	Myosin-8	Myh8	A.DSVAELGEQIDNLQRVK.Q	1201	1217		1130000	2400000	3410000	1790000	3610000	0	0	2580000	1860000	0	0	0	0	0
P13542	Myosin-8	Myh8	R.LQNEVEDLMIDVER.T	1424	1437		15400000	14400000	15300000	16100000	13200000	9740000	8680000	14500000	18700000	21000000	23000000	19500000	21100000	19500000
P13542	Myosin-8	Myh8	I.EELEEEIEAER.A	1119	1129		0	0	1680000	1760000	2960000	1630000	3600000	0	3120000	1540000	1490000	1800000	3920000	2990000
P13542	Myosin-8	Myh8	K.DTQLHLD.D	1655	1661		0	0	0	0	634000	0	980000	0	0	0	1070000	1860000	1450000	925000
P13542	Myosin-8	Myh8	R.LDEAEQLALK.G	1800	1809		0	0	0	0	0	0	0	0	0	0	0	0	0	0
P13542	Myosin-8	Myh8	R.IEELEEEIEAE.R	1118	1128		0	0	0	0	0	0	0	0	0	162000	1750000	2030000	2540000	3020000
P13542	Myosin-8	Myh8	K.MEGDLNEMEI.Q	1621	1630		3980000	1480000	2500000	2610000	1310000	2980000	1770000	0	6070000	5210000	5170000	4510000	4690000	4300000
P13542	Myosin-8	Myh8	A.MMAEELKKEQDTSAHLER.M	1767	1784		4980000	2410000	0	0	0	0	0	8640000	0	0	0	0	0	0
P13542	Myosin-8	Myh8	K.DTQLHLDDAL.R	1655	1664		0	0	0	0	0	0	0	0	0	0	0	2920000	3360000	0
P13542	Myosin-8	Myh8	E.EAEERADIAESQV.N	1908	1920		1700000	0	1430000	0	0	0	0	2840000	0	281000	0	0	0	0
P13542	Myosin-8	Myh8	R.RDLEEATLQHEATA.A	1179	1192		0	6650000	4130000	255000	2090000	0	0	10700000	0	0	0	0	0	1750000
P13542	Myosin-8	Myh8	Q.ARIEELEEEIEAERASR.A	1116	1132		0	894000	0	2170000	0	0	0	1470000	0	0	0	0	0	0
P13542	Myosin-8	Myh8	D.SVAELGEQI.D	1202	1210		0	0	0	0	0	0	0	0	0	0	0	2660000	0	3190000
P13542	Myosin-8	Myh8	K.HADSVAELGEQIDNLQRVKQKLEKEK.S	1199	1224		2250000	0	0	0	0	0	0	0	0	0	0	0	0	0
P13542	Myosin-8	Myh8	K.KALQEAHQQTLDDLQAEEDKV.N	1000	1020		0	521000	0	1050000	0	3450000	632000	0	2230000	565000	1950000	2460000	791000	638000
P13542	Myosin-8	Myh8	K.YDKIEDMA.M	87	94		0	0	0	0	0	0	0	0	0	1240000	2030000	2180000	0	0
P13542	Myosin-8	Myh8	R.RANLLQAEI.E	1680	1688		0	669000	968000	1080000	1370000	1320000	0	0	0	0	0	0	0	0
P13542	Myosin-8	Myh8	K.IAEQELLDASER.V	1704	1715		0	3220000	1670000	0	0	0	0	11600000	0	4460000	0	0	0	0
P13542	Myosin-8	Myh8	K.YETDAIQRTEELEEAKKK.L	1378	1395		53000000	36400000	22600000	3120000	4750000	778000	0	21100000	8790000	5500000	0	0	0	0
P13542	Myosin-8	Myh8	K.KIKELQARIEELEEEIEAERASRAK.A	1110	1134		3050000	0	0	0	0	0	0	0	0	0	0	0	0	0
P13542	Myosin-8	Myh8	R.QEAPPHIFSI.S	151	160		0	0	0	0	0	449000	0	1730000	3060000	1180000	0	668000	0	0
P13542	Myosin-8	Myh8	E.DLMIDVER.T	1430	1437		0	0	0	0	0	0	0	0	0	407000	0	949000	1970000	1640000
P13542	Myosin-8	Myh8	K.NLQQEISDLTEQI.A	1507	1519		1430000	0	0	0	0	0	0	0	0	0	0	0	0	0
P13542	Myosin-8	Myh8	A.ELGEQIDNLQRV.K	1205	1216		0	272000	1120000	0	0	0	0	0	0	3180000	0	0	0	0
P13542	Myosin-8	Myh8	R.KIAEQELLDASER.V	1703	1715		8180000	3390000	5700000	850000	0	0	3250000	0	863000	5200000	0	1380000	0	1360000
P13542	Myosin-8	Myh8	A.HQQTLDDLQAEEDKV.N	1006	1020		0	0	675000	0	0	0	0	0	0	0	0	2460000	3770000	4860000
P13542	Myosin-8	Myh8	D.AAMMAEELKKEQDTSAHLER.M	1765	1784		5620000	0	0	0	0	0	0	0	0	0	0	0	0	0
P13542	Myosin-8	Myh8	R.ADIAESQVNKL.R	1913	1923		0	0	0	0	0	0	0	0	0	474000	0	0	0	1380000
P13542	Myosin-8	Myh8	K.NALAHALQSSRHD.C	1330	1342		0	0	0	0	0	0	0	0	0	0	0	0	0	0
P13542	Myosin-8	Myh8	R.ANLLQAEIEELRATLEQTERSR.K	1681	1702		1560000	0	0	0	0	0	0	0	0	0	0	0	0	0
P13542	Myosin-8	Myh8	E.APPHIFSI.S	153	160		0	0	858000	984000	0	1240000	1210000	0	0	0	0	0	0	0
P13542	Myosin-8	Myh8	E.LGEQIDNLQR.V	1206	1215		0	0	2070000	2840000	5510000	9540000	10400000	0	0	0	0	0	0	0
P13542	Myosin-8	Myh8	Q.QIEELKR.Q	1314	1320		1300000	2880000	0	0	0	0	0	0	0	0	0	0	0	0
P13542	Myosin-8	Myh8	R.HDC(+57.02)DLL.R	1341	1346		0	0	0	0	0	0	0	0	0	0	0	0	1350000	2490000
P13542	Myosin-8	Myh8	G.ILKDTQL.H	1652	1658		0	0	0	0	222000	1680000	1920000	0	0	0	0	0	0	0
P13542	Myosin-8	Myh8	C.SELKKDIDDLELT.L	951	963		9700000	15300000	13700000	16100000	11900000	12900000	11800000	12300000	8170000	8270000	6080000	4800000	5550000	3660000
P13542	Myosin-8	Myh8	R.IEELEEEIEA.E	1118	1127		0	663000	0	1430000	3000000	4240000	4620000	0	785000	716000	2310000	1030000	5840000	6180000
P13542	Myosin-8	Myh8	L.DDLQAEEDKVNTLTK.A	1011	1025		0	1290000	0	0	635000	0	672000	1410000	1280000	274000	0	804000	0	0
P13542	Myosin-8	Myh8	D.ALRGQEDLKEQLA.I	1663	1675		0	0	1290000	1530000	0	0	0	0	0	0	0	0	0	0
P13542	Myosin-8	Myh8	E.ERADIAESQVNKLR.V	1911	1924		0	1320000	2080000	0	0	0	0	0	0	0	0	0	0	0
P13542	Myosin-8	Myh8	K.ELQARIEELEEEIEAERASRAKAEK.Q	1113	1137		29500000	5480000	0	0	0	0	0	3370000	0	0	0	0	0	0
P13542	Myosin-8	Myh8	R.KLEDEC(+57.02)SELK.K	945	954		0	0	0	8100000	0	0	0	10600000	6920000	0	2270000	5730000	14500000	70100000
P13542	Myosin-8	Myh8	R.SDLSREL.E	1140	1146		0	339000	802000	0	681000	0	1240000	0	0	0	0	0	0	0
P13542	Myosin-8	Myh8	R.LDEAEQLALKGGKK.Q	1800	1813		13700000	35000000	32900000	29800000	34200000	33300000	29100000	18200000	25400000	33100000	15300000	9740000	4960000	1320000
P13542	Myosin-8	Myh8	A.RIEELEEEIEAERASRAKAEKQR.S	1117	1139		0	0	0	0	0	0	0	0	0	0	0	0	0	0
P13542	Myosin-8	Myh8	R.RANLLQAEIEELRA.T	1680	1693		0	1350000	0	678000	0	0	0	690000	0	0	0	0	0	0
P13542	Myosin-8	Myh8	K.ALQEAHQQTLDDLQAEEDKVNTL.T	1001	1023		0	352000	0	0	0	0	0	2510000	0	0	0	0	0	0
P13542	Myosin-8	Myh8	A.RIEELEEEIEAERASR.A	1117	1132		92600000	140000000	123000000	98900000	62200000	34600000	11100000	111000000	47900000	18800000	7170000	3640000	0	2980000
P13542	Myosin-8	Myh8	D.DLEGSLEQEK.K	1036	1045		4740000	7090000	9790000	12300000	11300000	16400000	19700000	7890000	14400000	20100000	22300000	27700000	33800000	35800000
P13542	Myosin-8	Myh8	R.IEELEEEIE.A	1118	1126		0	0	0	0	1080000	0	1570000	0	0	0	0	0	0	0
P13542	Myosin-8	Myh8	R.LQNEVEDLMIDVERTNAA.C	1424	1441		1620000	0	0	0	0	0	0	0	0	0	0	0	0	0
P13542	Myosin-8	Myh8	R.ANLLQAEIEELRATLEQTER.S	1681	1700		483000	0	0	0	0	0	0	0	0	0	0	0	0	0
P13542	Myosin-8	Myh8	K.HADSVAELGEQIDNLQRVKQKLEK.E	1199	1222		2570000	0	0	0	0	0	0	0	0	0	0	0	0	0
P13542	Myosin-8	Myh8	K.HADSVAELGEQIDNLQRVK.Q	1199	1217		342000000	210000000	191000000	110000000	59200000	29300000	9650000	113000000	18000000	8920000	0	0	0	0
P13542	Myosin-8	Myh8	Q.NEVEDLMIDVERT.N	1426	1438		0	0	0	0	1370000	1080000	0	0	0	0	0	0	0	0
P13542	Myosin-8	Myh8	N.LLQAEIEELRA.T	1683	1693		0	0	0	978000	0	0	0	961000	0	0	0	0	0	0
P13542	Myosin-8	Myh8	I.TDAAMMAEELKKEQDTSAHLER.M	1763	1784		0	0	0	0	0	0	0	0	0	0	0	0	0	0
P13542	Myosin-8	Myh8	K.KHADSVAELGEQIDNLQR.V	1198	1215		2540000	3680000	3460000	2310000	0	0	0	7700000	0	0	0	0	0	0
P13542	Myosin-8	Myh8	K.AITDAAMM(+15.99)AEELKKEQDTSAHLER.M	1761	1784	Oxidation (M)	2210000	0	0	0	0	0	0	0	0	0	0	0	0	0
P13542	Myosin-8	Myh8	A.NLLQAEIEELR.A	1682	1692		0	0	0	0	0	0	0	0	0	0	1410000	766000	0	0
P13542	Myosin-8	Myh8	K.LEQQVDDLEGSLEQEK.K	1030	1045		591000	834000	2520000	4080000	3620000	6010000	11800000	0	3500000	8420000	9050000	14500000	21400000	20100000
P13542	Myosin-8	Myh8	R.ELEEISERLEEA.G	1145	1156		0	0	0	0	0	0	0	2050000	0	0	0	0	0	0
P13542	Myosin-8	Myh8	V.AELGEQIDNLQRVKQK.L	1204	1219		921000	0	0	0	0	0	0	0	0	0	0	0	0	0
P13542	Myosin-8	Myh8	D.DLELTLAK.V	959	966		1010000	0	0	0	0	0	0	0	0	0	0	0	0	0
P13542	Myosin-8	Myh8	L.EEAEERADIAESQVNKLR.V	1907	1924		0	0	1920000	0	0	0	0	0	0	0	0	0	0	0
P13542	Myosin-8	Myh8	A.RIEELEEEIEAERASRA.K	1117	1133		0	1860000	0	0	0	0	0	0	0	0	0	0	0	0
P13542	Myosin-8	Myh8	A.ITDAAMMAEELKKEQDTSAHLER.M	1762	1784		712000	0	0	0	0	0	0	0	0	0	0	0	0	0
P13542	Myosin-8	Myh8	K.ELQARIEELEEEIEAERA.S	1113	1130		0	0	0	0	0	0	0	0	0	0	0	0	0	0
P13542	Myosin-8	Myh8	V.TERAEDEEEINAELTAKKR.K	926	944		7390000	4370000	0	0	0	0	1150000	2830000	0	0	0	0	0	0
P13542	Myosin-8	Myh8	D.DLQAEEDKVNTL.T	1012	1023		2040000	0	0	0	0	0	0	0	0	1530000	0	3610000	0	1960000
P13542	Myosin-8	Myh8	A.RIEELEEEIEAE.R	1117	1128		0	0	0	0	0	700000	984000	0	0	6720000	0	1680000	3140000	3230000
P13542	Myosin-8	Myh8	K.YDKIEDMAM.M	87	95		0	0	0	0	0	0	0	0	0	0	0	0	0	1380000
P13542	Myosin-8	Myh8	D.C(+57.02)DLLREQYE.E	1343	1351	Carbamidomethylation	0	0	0	442000	0	0	749000	0	0	0	0	0	0	0
P13542	Myosin-8	Myh8	K.ELQARIEELEEEIEAER.A	1113	1129		0	0	0	0	0	0	0	0	0	0	0	0	0	0
P13542	Myosin-8	Myh8	T.LDDLQAEEDKVNT.L	1010	1022		0	0	0	1760000	3550000	1880000	0	0	0	0	0	0	3510000	0
P13542	Myosin-8	Myh8	Q.HELEEAEERADIAESQVNKLR.V	1904	1924		0	0	0	0	0	0	0	0	0	0	0	0	0	0
P13542	Myosin-8	Myh8	D.LELTLAKVEKEK.H	960	971		0	0	0	0	0	0	0	0	0	0	0	0	0	0
P13542	Myosin-8	Myh8	R.HDC(+57.02)DLLREQY.E	1341	1350	Carbamidomethylation	393000	2060000	3930000	4690000	4430000	3300000	5020000	0	1970000	2010000	1620000	1200000	0	0
P13542	Myosin-8	Myh8	R.LQNEVEDLMIDVERT.N	1424	1438		23500000	34700000	22700000	32900000	29000000	24300000	15500000	31200000	32300000	26300000	34400000	20000000	19900000	14200000
P13542	Myosin-8	Myh8	E.ELEEEIEAERA.S	1120	1130		0	0	0	0	0	0	558000	0	0	0	0	0	0	0
Q5SX40	Myosin-1	Myh1	I.SERLEEAGGATSA.Q	1154	1166		200000000	209000000	228000000	187000000	143000000	97800000	59500000	164000000	101000000	0	6970000	19000000	6350000	5210000
Q5SX40	Myosin-1	Myh1	R.DLEEATLQHEAT.A	1184	1195		249000000	228000000	232000000	185000000	114000000	66000000	28900000	107000000	16500000	15400000	10400000	2550000	0	973000
Q5SX40	Myosin-1	Myh1	R.TKYETDAIQR.T	1380	1389		155000000	247000000	209000000	257000000	205000000	391000000	248000000	299000000	301000000	442000000	570000000	387000000	183000000	429000000
Q5SX40	Myosin-1	Myh1	V.FGEAAPYLRK.S	10	19		251000000	219000000	194000000	189000000	187000000	167000000	142000000	181000000	151000000	131000000	120000000	97600000	73100000	20100000
Q5SX40	Myosin-1	Myh1	A.EEHVEAV.N	1408	1414		24400000	49300000	48700000	65100000	64700000	84100000	80300000	46300000	81200000	151000000	118000000	133000000	198000000	169000000
Q5SX40	Myosin-1	Myh1	R.IEELEEEIEAER.A	1122	1133		52400000	242000000	212000000	128000000	150000000	105000000	98000000	121000000	213000000	303000000	305000000	273000000	254000000	194000000
Q5SX40	Myosin-1	Myh1	V.FGEAAPYLR.K	10	18		798000000	787000000	719000000	715000000	689000000	627000000	547000000	853000000	822000000	747000000	651000000	580000000	500000000	340000000
Q5SX40	Myosin-1	Myh1	N.RMAAEALR.N	1641	1648		17800000	5640000	16100000	16400000	1070000000	46400000	10600000	216000000	32800000	20100000	21400000	0	6680000	0
Q5SX40	Myosin-1	Myh1	R.GKQAFTQQI.E	1311	1319		35900000	67500000	66700000	72000000	73700000	73100000	55600000	77100000	89900000	84300000	57000000	42400000	22200000	9660000
Q5SX40	Myosin-1	Myh1	K.NLEQTVK.D	1792	1798		42200000	74100000	83400000	49100000	85300000	50500000	45500000	34500000	36400000	31300000	55700000	60300000	42200000	18000000
Q5SX40	Myosin-1	Myh1	I.SERLEEAGGA.T	1154	1163		0	25700000	31900000	43000000	37800000	28800000	47400000	32700000	59400000	75600000	86100000	99900000	99900000	88500000
Q5SX40	Myosin-1	Myh1	A.EERADIAES.Q	1914	1922		30100000	46600000	63300000	95000000	66600000	78600000	77200000	22900000	49100000	33600000	24900000	25300000	11200000	0
Q5SX40	Myosin-1	Myh1	R.TKYETDAIQRT.E	1380	1390		202000000	169000000	296000000	252000000	304000000	277000000	225000000	180000000	164000000	84800000	118000000	139000000	109000000	55300000
Q5SX40	Myosin-1	Myh1	R.KLEGDLKLA.Q	1061	1069		230000000	184000000	149000000	137000000	126000000	123000000	111000000	120000000	62300000	32200000	5960000	5900000	0	7270000
Q5SX40	Myosin-1	Myh1	A.GLDETIAK.L	991	998		25100000	37900000	38700000	14100000	41800000	40600000	38400000	34600000	42800000	51600000	46100000	43800000	37000000	35100000
Q5SX40	Myosin-1	Myh1	A.EEDKVNTLTK.A	1020	1029		84600000	220000000	159000000	165000000	249000000	278000000	218000000	149000000	134000000	95900000	93200000	51900000	50900000	4290000
Q5SX40	Myosin-1	Myh1	N.LLQAEIEELR.A	1687	1696		0	15300000	17500000	1920000	4600000	30300000	32400000	733000	110000000	118000000	124000000	99800000	1670000	0
Q5SX40	Myosin-1	Myh1	S.KIEDEQAL.G	1100	1107		4540000	0	0	0	6170000	4650000	141000000	0	0	0	0	178000000	197000000	15300000
Q5SX40	Myosin-1	Myh1	R.TKYETDAIQRTEELEEAKKK.L	1380	1399		445000000	289000000	256000000	151000000	70700000	34400000	10500000	337000000	119000000	47400000	18700000	8580000	0	1340000
Q5SX40	Myosin-1	Myh1	A.RIEELEEEIEAERA.S	1121	1134		15900000	55200000	52600000	46500000	98800000	89600000	71200000	89800000	140000000	99000000	107000000	100000000	78900000	60900000
Q5SX40	Myosin-1	Myh1	R.GKQAFTQQIEELKR.Q	1311	1324		173000000	178000000	192000000	117000000	94500000	52500000	15600000	120000000	43000000	4530000	12600000	0	0	2080000
Q5SX40	Myosin-1	Myh1	R.ANLLQAEIEELRAT.L	1685	1698		43800000	0	47500000	35700000	24400000	12700000	8480000	56700000	46600000	33700000	34000000	0	16600000	3890000
Q5SX40	Myosin-1	Myh1	R.DLEEATLQHEATA.A	1184	1196		90200000	64700000	68100000	49000000	29300000	16400000	8000000	30400000	9680000	7200000	0	0	0	0
Q5SX40	Myosin-1	Myh1	K.HADSVAELGEQIDNLQR.V	1203	1219		218000000	170000000	147000000	122000000	79900000	84200000	54400000	67900000	53300000	37900000	16000000	12500000	2350000	4140000
Q5SX40	Myosin-1	Myh1	S.RHDC(+57.02)DLLR.E	1344	1351		65200000	58400000	68500000	74600000	94000000	88000000	79700000	2950000	28500000	0	0	1690000	0	0
Q5SX40	Myosin-1	Myh1	F.GEAAPYLR.K	11	18		15800000	17600000	31700000	32100000	47700000	50400000	55200000	7260000	14100000	19400000	0	26200000	33800000	31100000
Q5SX40	Myosin-1	Myh1	R.MDLERAK.R	1053	1059		382000000	0	9850000	0	0	0	0	0	0	0	0	0	0	0
Q5SX40	Myosin-1	Myh1	R.KIAEQELL.D	1707	1714		165000000	31700000	48100000	87300000	356000000	166000000	54600000	0	346000000	397000000	187000000	482000000	267000000	57200000
Q5SX40	Myosin-1	Myh1	N.SEVAQWR.T	1373	1379		28800000	32000000	6960000	27000000	23100000	26200000	19600000	39800000	29100000	25600000	21700000	18900000	17900000	11300000
Q5SX40	Myosin-1	Myh1	K.MRRDLEEA.T	1181	1188		0	14400000	11300000	0	14100000	16300000	49400000	40100000	23400000	14900000	27100000	34600000	69700000	2760000
Q5SX40	Myosin-1	Myh1	I.SERLEEAGGAT.S	1154	1164		142000000	9420000	244000000	43700000	36900000	581000000	85600000	0	16200000	320000000	366000000	409000000	306000000	0
Q5SX40	Myosin-1	Myh1	R.IEELEEEIEAERASRAK.A	1122	1138		128000000	86100000	84600000	62600000	28200000	10700000	28700000	63700000	40700000	42500000	42300000	40400000	34300000	28100000
Q5SX40	Myosin-1	Myh1	S.ALAHALQSSR.H	1335	1344		52700000	36900000	39600000	28400000	33600000	23200000	12300000	196000000	302000000	25900000	295000000	3380000	237000000	0
Q5SX40	Myosin-1	Myh1	E.EEIEAERA.S	1127	1134		0	7110000	0	17900000	23300000	45300000	39300000	0	18000000	29800000	21700000	52100000	23600000	54200000
Q5SX40	Myosin-1	Myh1	A.RIEELEEEI.E	1121	1129		0	8590000	13300000	23100000	31500000	48700000	61600000	0	9540000	0	21900000	24100000	34800000	53400000
Q5SX40	Myosin-1	Myh1	K.ANSEVAQWR.T	1371	1379		38900000	21600000	27900000	23200000	18400000	14200000	8780000	28500000	18100000	14700000	6780000	4580000	2570000	0
Q5SX40	Myosin-1	Myh1	D.LQAEEDKV.N	1017	1024		10500000	13100000	3610000	23400000	8340000	21400000	17800000	27100000	12100000	24100000	17600000	29300000	32500000	27900000
Q5SX40	Myosin-1	Myh1	R.IEELEEEIEAERAS.R	1122	1135		13400000	11900000	14400000	2530000	14700000	13300000	10000000	19000000	26800000	29000000	27600000	30100000	27400000	12700000
Q5SX40	Myosin-1	Myh1	A.ELGEQIDNLQRVK.Q	1209	1221		19900000	59500000	53300000	69600000	43400000	82800000	105000000	34700000	21700000	11700000	4550000	1580000	0	0
Q5SX40	Myosin-1	Myh1	K.QAFTQQIEELKR.Q	1313	1324		42700000	30100000	34400000	26500000	16400000	9060000	1840000	24500000	14800000	8760000	1990000	0	0	0
Q5SX40	Myosin-1	Myh1	K.YETDAIQR.T	1382	1389		18300000	23800000	36500000	39500000	40300000	37700000	39300000	24900000	23000000	29600000	26800000	0	27000000	8480000
Q5SX40	Myosin-1	Myh1	G.EAAPYLR.K	12	18		8440000	16400000	24900000	30500000	35400000	34400000	36700000	4870000	4940000	3670000	4530000	4790000	6230000	3470000
Q5SX40	Myosin-1	Myh1	A.SLEHEEGKILR.I	1557	1567		20700000	29700000	34300000	29000000	22700000	18400000	16800000	0	14900000	29800000	7020000	24600000	16600000	9590000
Q5SX40	Myosin-1	Myh1	D.LEGSLEQEK.K	1041	1049		32800000	31400000	21700000	23900000	19400000	22600000	18700000	32700000	29800000	23400000	26600000	18800000	20800000	18200000
Q5SX40	Myosin-1	Myh1	S.ALAHALQS.S	1335	1342		18600000	5800000	6130000	19600000	8330000	10100000	12800000	10700000	13400000	14200000	31400000	13200000	22400000	22800000
Q5SX40	Myosin-1	Myh1	V.DDLEGSLEQEKK.I	1039	1050		23700000	47200000	67100000	72300000	77800000	97400000	108000000	67400000	108000000	137000000	168000000	191000000	237000000	273000000
Q5SX40	Myosin-1	Myh1	K.VGNEYVTK.G	409	416		0	0	4350000	0	113000000	0	0	0	11800000	42100000	7560000	0	0	0
Q5SX40	Myosin-1	Myh1	A.ELGEQIDNLQR.V	1209	1219		44400000	66100000	73600000	94000000	107000000	116000000	122000000	96200000	126000000	141000000	150000000	144000000	143000000	129000000
Q5SX40	Myosin-1	Myh1	A.NSEVAQWR.T	1372	1379		10700000	39800000	22600000	11400000	12600000	38900000	20200000	5070000	20100000	0	8700000	0	0	0
Q5SX40	Myosin-1	Myh1	K.LYEQHLGK.S	555	562		14700000	16500000	12100000	9090000	14200000	0	15800000	17600000	6580000	22900000	9180000	14000000	7280000	7960000
Q5SX40	Myosin-1	Myh1	A.RIEELEEEIEAER.A	1121	1133		18700000	42700000	64000000	72200000	76600000	61300000	58700000	41300000	91600000	86200000	86900000	89900000	77500000	77100000
Q5SX40	Myosin-1	Myh1	R.SDLSRELEEI.S	1144	1153		443000000	481000000	393000000	100000000	316000000	283000000	206000000	366000000	203000000	112000000	53400000	27500000	21000000	23000000
Q5SX40	Myosin-1	Myh1	D.AIQRTEELEEAKKK.L	1386	1399		32600000	31900000	13700000	10700000	9300000	0	0	9370000	0	0	0	0	0	0
Q5SX40	Myosin-1	Myh1	R.VQLLHTQNT.S	1720	1728		4220000	28700000	4940000	27400000	11800000	33900000	22100000	7840000	20100000	10700000	12600000	7660000	5970000	6590000
Q5SX40	Myosin-1	Myh1	K.IQHELEEA.E	1906	1913		4760000	9500000	31000000	34700000	28700000	25500000	25200000	0	10700000	7830000	0	0	0	15400000
Q5SX40	Myosin-1	Myh1	E.EAEERADIAES.Q	1912	1922		7300000	73500000	4880000	67400000	0	0	0	7230000	8590000	7040000	0	0	0	0
Q5SX40	Myosin-1	Myh1	L.EEEIEAERA.S	1126	1134		0	38200000	0	42700000	12300000	58600000	12400000	0	0	26300000	0	0	0	0
Q5SX40	Myosin-1	Myh1	L.EEEIEAERASR.A	1126	1136		3060000	29000000	44700000	44400000	24200000	22000000	13200000	19500000	14800000	27900000	0	0	0	9030000
Q5SX40	Myosin-1	Myh1	K.LEQQVDDLEGSLEQEKK.I	1034	1050		4810000	0	10100000	13000000	20600000	18000000	14400000	20700000	20300000	27300000	39400000	33500000	28200000	37600000
Q5SX40	Myosin-1	Myh1	D.AEERC(+57.02)DQLIK.T	908	917	Carbamidomethylation	10500000	10100000	24300000	12400000	2590000	3150000	4620000	20300000	26400000	16700000	18900000	10200000	15900000	19100000
Q5SX40	Myosin-1	Myh1	R.DLEEATLQHEA.T	1184	1194		20600000	21500000	22000000	16100000	14700000	9420000	7120000	9330000	5410000	5380000	0	0	8610000	11800000
Q5SX40	Myosin-1	Myh1	I.SERLEEAGGATS.A	1154	1165		8870000	12500000	12900000	8490000	10700000	15300000	10700000	10100000	14500000	10000000	15700000	8370000	4850000	1980000
Q5SX40	Myosin-1	Myh1	K.ESFVKATVQSR.E	45	55		62200000	19700000	39500000	30500000	33300000	27000000	9090000	9330000	2580000	0	0	5450000	1750000	1300000
Q5SX40	Myosin-1	Myh1	D.DLEGSLEQEKKIR.M	1040	1052		92300000	80800000	72700000	70500000	72200000	68200000	16900000	25600000	15400000	6050000	12800000	7790000	0	1490000
Q5SX40	Myosin-1	Myh1	K.ALQEAHQQTLD.D	1005	1015		7470000	8460000	28000000	10800000	22100000	20400000	14000000	0	8440000	7120000	8420000	6500000	4520000	0
Q5SX40	Myosin-1	Myh1	R.QLEEEIKAK.S	1325	1333		26500000	19400000	39600000	20900000	30100000	5120000	0	47100000	7930000	10000000	5640000	2670000	1780000	450000
Q5SX40	Myosin-1	Myh1	M.IDVERT.N	1437	1442		0	0	0	7880000	0	6860000	8460000	0	0	11400000	17200000	20300000	23200000	57300000
Q5SX40	Myosin-1	Myh1	K.IQHELEEAEERA.D	1906	1917		16500000	17800000	21000000	20500000	6420000	10100000	3500000	25200000	27800000	23100000	24800000	8070000	5890000	3230000
Q5SX40	Myosin-1	Myh1	T.QQIEELKR.Q	1317	1324		0	7690000	0	7770000	0	0	0	19400000	13500000	20800000	18300000	25700000	22400000	0
Q5SX40	Myosin-1	Myh1	K.YEETHAELEA.S	1467	1476		7190000	12200000	14900000	17300000	16100000	14800000	10900000	14900000	14300000	0	0	0	5410000	0
Q5SX40	Myosin-1	Myh1	R.KIQHELEEA.E	1905	1913		12900000	32100000	37600000	49400000	77300000	93000000	108000000	16400000	26200000	35500000	64100000	61400000	84500000	129000000
Q5SX40	Myosin-1	Myh1	R.NFDKILAEWKQK.Y	1455	1466		21000000	17800000	20000000	15700000	7230000	5590000	2300000	14700000	8670000	6320000	7570000	0	4890000	0
Q5SX40	Myosin-1	Myh1	R.TKYETDAI.Q	1380	1387		13900000	42000000	32700000	53000000	62900000	69500000	62700000	46200000	78900000	76200000	110000000	122000000	114000000	104000000
Q5SX40	Myosin-1	Myh1	K.NLTEEMAGLDETIAKLTK.E	984	1001		58900000	30800000	31600000	20200000	19000000	13200000	7160000	30800000	16200000	8720000	3200000	1090000	1480000	0
Q5SX40	Myosin-1	Myh1	A.SLEHEEGKIL.R	1557	1566		8650000	16600000	15500000	17300000	20800000	28000000	34400000	13200000	18400000	23100000	30100000	33600000	33600000	29800000
Q5SX40	Myosin-1	Myh1	K.KMEGDLNEMEI.Q	1624	1634		21000000	18900000	20100000	15100000	3330000	12200000	10900000	11500000	8870000	0	7720000	5790000	7860000	5380000
Q5SX40	Myosin-1	Myh1	A.RIEELEEEIEAERASRAK.A	1121	1138		35400000	32200000	26800000	19500000	9220000	11100000	14900000	15700000	12700000	10600000	8390000	9440000	9090000	6070000
Q5SX40	Myosin-1	Myh1	A.EEDKVNTLTKAK.I	1020	1031		21100000	74600000	0	0	0	7090000	0	0	0	0	0	0	0	0
Q5SX40	Myosin-1	Myh1	K.ALQEAHQQTLDDLQA.E	1005	1019		11700000	17400000	31000000	35200000	23600000	37100000	36500000	13000000	18100000	22100000	17300000	17500000	12900000	9230000
Q5SX40	Myosin-1	Myh1	K.ELQARIEELE.E	1117	1126		4540000	6030000	4170000	5690000	6240000	7750000	10100000	2880000	4980000	8270000	5580000	15900000	20800000	17200000
Q5SX40	Myosin-1	Myh1	S.ERLEEAGGAT.S	1155	1164		0	0	9940000	0	19500000	34300000	56600000	0	0	0	0	0	0	0
Q5SX40	Myosin-1	Myh1	K.MRRDLEEATL.Q	1181	1190		15100000	0	31100000	541000	6050000	0	0	24900000	1720000	10400000	0	21500000	3440000	0
Q5SX40	Myosin-1	Myh1	K.LEGDLKLA.Q	1062	1069		17900000	15100000	15500000	12000000	15800000	19000000	15800000	28700000	8110000	4230000	3900000	3440000	4980000	2190000
Q5SX40	Myosin-1	Myh1	D.LEGSLEQEKKIR.M	1041	1052		58000000	32400000	8720000	10100000	8790000	5920000	25500000	9150000	3770000	0	0	0	0	0
Q5SX40	Myosin-1	Myh1	R.KIQHELEEAEERADIAESQVNKLR.V	1905	1928		30700000	16900000	13000000	6840000	2140000	0	0	27100000	0	0	0	0	0	0
Q5SX40	Myosin-1	Myh1	K.ELQARIEELEEEIEAERASR.A	1117	1136		74700000	33200000	17700000	966000	0	0	0	33900000	3530000	1080000	0	0	0	0
Q5SX40	Myosin-1	Myh1	R.KIAEQELLDA.S	1707	1716		0	5300000	4440000	7020000	11300000	9660000	6350000	7330000	3900000	9540000	10300000	9430000	8670000	3740000
Q5SX40	Myosin-1	Myh1	R.QLEEEIK.A	1325	1331		3900000	0	7510000	7670000	6010000	5590000	7770000	4730000	8060000	10500000	10800000	9640000	9890000	8670000
Q5SX40	Myosin-1	Myh1	R.IEAQNKPFDAK.S	25	35		10300000	9860000	11600000	4930000	9670000	9200000	8280000	6780000	6700000	8500000	7410000	6370000	5660000	5720000
Q5SX40	Myosin-1	Myh1	D.LEEATLQHEAT.A	1185	1195		23700000	13500000	14500000	11000000	12700000	4880000	2200000	9170000	0	0	0	0	0	0
Q5SX40	Myosin-1	Myh1	D.AEEHVEAV.N	1407	1414		0	5210000	3910000	4960000	7320000	6830000	6820000	7240000	7670000	9040000	8490000	12200000	10300000	11100000
Q5SX40	Myosin-1	Myh1	A.FTQQIEELKR.Q	1315	1324		7190000	12800000	22200000	21700000	24200000	20300000	15600000	0	1150000	0	0	0	0	0
Q5SX40	Myosin-1	Myh1	D.LQAEEDKVNTLTK.A	1017	1029		12000000	8470000	10200000	12900000	10700000	8120000	3870000	19000000	6620000	3450000	5120000	4310000	0	2670000
Q5SX40	Myosin-1	Myh1	R.ELEEISERLEEAG.G	1149	1161		2600000	11000000	12200000	13200000	12200000	12800000	12800000	1080000	0	3720000	3910000	4210000	0	1160000
Q5SX40	Myosin-1	Myh1	S.DLSRELEEI.S	1145	1153		3250000	6040000	8880000	10400000	18500000	19800000	19900000	2340000	3570000	2440000	952000	1620000	0	0
Q5SX40	Myosin-1	Myh1	K.KALQEAHQQTLD.D	1004	1015		5330000	7170000	9210000	10100000	10200000	12200000	9930000	3370000	4290000	5510000	4700000	3090000	1320000	0
Q5SX40	Myosin-1	Myh1	R.GKQAFTQQIEELKRQLEEEIKAK.S	1311	1333		48800000	18400000	8690000	0	0	0	0	5630000	0	0	0	0	0	0
Q5SX40	Myosin-1	Myh1	R.LQDLVDK.L	1871	1877		7680000	14900000	16100000	16300000	19200000	21000000	21400000	18300000	20800000	28000000	34300000	41700000	47000000	63600000
Q5SX40	Myosin-1	Myh1	K.IAEQELLDASERV.Q	1708	1720		7830000	16700000	11200000	13500000	11100000	9240000	7460000	20300000	22200000	15500000	18600000	11300000	10300000	7330000
Q5SX40	Myosin-1	Myh1	R.SDLSRELEEISERLEEAGGATSA.Q	1144	1166		34900000	0	0	0	0	0	0	2740000	0	0	0	0	0	0
Q5SX40	Myosin-1	Myh1	R.ENKNLQQEI.S	1508	1516		17600000	4540000	3270000	19400000	5720000	2540000	22600000	0	2960000	0	0	0	0	0
Q5SX40	Myosin-1	Myh1	R.LQDLVDKL.Q	1871	1878		11700000	7180000	7990000	10600000	19600000	23700000	41700000	32500000	24500000	43800000	37800000	79700000	77600000	85000000
Q5SX40	Myosin-1	Myh1	E.AEERADIAESQV.N	1913	1924		0	0	0	6910000	13700000	0	0	0	15000000	23700000	6520000	5730000	10500000	0
Q5SX40	Myosin-1	Myh1	D.DALRGQEDLKEQLA.M	1666	1679		10100000	7280000	9180000	9090000	12300000	14300000	18300000	4330000	8690000	5450000	6050000	5920000	4220000	2910000
Q5SX40	Myosin-1	Myh1	K.QKYEETHAELEA.S	1465	1476		7710000	8850000	5850000	5160000	4500000	3660000	0	2380000	3850000	4590000	2490000	4050000	2730000	3400000
Q5SX40	Myosin-1	Myh1	I.RMDLER.A	1052	1057		9330000	0	4040000	0	0	4440000	0	0	0	33200000	23500000	0	0	0
Q5SX40	Myosin-1	Myh1	K.QIQKLEAR.V	1818	1825		16300000	12300000	0	0	11100000	0	0	0	0	0	0	0	0	0
Q5SX40	Myosin-1	Myh1	L.STELFK.I	1485	1490		0	2080000	4480000	5400000	7610000	8680000	9130000	778000	0	0	885000	0	0	0
Q5SX40	Myosin-1	Myh1	D.LSRELEEI.S	1146	1153		19100000	7950000	8150000	5520000	8200000	10700000	9740000	0	0	0	0	0	0	0
Q5SX40	Myosin-1	Myh1	V.AELGEQIDNLQRVK.Q	1208	1221		75200000	83200000	154000000	145000000	145000000	60500000	157000000	148000000	82800000	39000000	7530000	6540000	0	0
Q5SX40	Myosin-1	Myh1	A.DIAESQVNK.L	1918	1926		5870000	0	0	0	0	0	0	0	666000	0	13100000	30700000	2230000	24900000
Q5SX40	Myosin-1	Myh1	T.LEDQVSELK.T	1259	1267		0	0	0	0	10900000	8240000	10300000	3070000	5660000	2080000	4670000	12900000	1900000	1710000
Q5SX40	Myosin-1	Myh1	N.LLQAEIEELRAT.L	1687	1698		2940000	3090000	4770000	6200000	8900000	10800000	7380000	5610000	4030000	2140000	1390000	1980000	2990000	1610000
Q5SX40	Myosin-1	Myh1	K.QAFTQQI.E	1313	1319		2000000	3230000	10700000	3690000	2580000	3240000	3920000	2690000	1950000	6140000	10900000	3950000	2230000	2860000
Q5SX40	Myosin-1	Myh1	A.NLLQAEIEELRAT.L	1686	1698		4090000	4880000	4320000	2760000	4580000	2550000	694000	6080000	122000	8650000	13400000	1240000	4780000	0
Q5SX40	Myosin-1	Myh1	K.ELTYQTEEDRK.N	1856	1866		5740000	17900000	26600000	19800000	21700000	10000000	33000000	19000000	36900000	57700000	53700000	71000000	86200000	84200000
Q5SX40	Myosin-1	Myh1	R.EAEFQKMR.R	1175	1182		43900000	40300000	12900000	16100000	10400000	17300000	5940000	25000000	5590000	0	5440000	0	45500000	0
Q5SX40	Myosin-1	Myh1	A.DIAESQVNKLR.V	1918	1928		91600000	131000000	122000000	141000000	126000000	113000000	109000000	103000000	88700000	69800000	50200000	30300000	19000000	13500000
Q5SX40	Myosin-1	Myh1	L.EEISERLEEAGGAT.S	1151	1164		0	2390000	3760000	3420000	3750000	4130000	3750000	2710000	25200000	5320000	5460000	4280000	1990000	2400000
Q5SX40	Myosin-1	Myh1	A.SLEHEEGKILRI.Q	1557	1568		41100000	33700000	30000000	25000000	22000000	16800000	9600000	13200000	20800000	11500000	8050000	1020000	0	0
Q5SX40	Myosin-1	Myh1	K.ALQEAHQQTLDDLQAEEDKVNTLTK.A	1005	1029		23000000	37400000	43900000	35500000	17100000	8230000	3610000	33300000	3830000	5230000	2150000	4910000	0	0
Q5SX40	Myosin-1	Myh1	K.LEQQVDDLEGSLEQEKKIR.M	1034	1052		115000000	98000000	104000000	80900000	69000000	62300000	53500000	72100000	108000000	147000000	12000000	738000	225000	0
Q5SX40	Myosin-1	Myh1	R.NFDKILAEWK.Q	1455	1464		24000000	23300000	17500000	18700000	14500000	8250000	19300000	28100000	31200000	33000000	17300000	14300000	8040000	3860000
Q5SX40	Myosin-1	Myh1	R.SDLSRELEEISERLEEAGGAT.S	1144	1164		27200000	0	0	0	0	0	0	2840000	0	0	0	0	0	0
Q5SX40	Myosin-1	Myh1	L.KKEQDTSAHLER.M	1777	1788		0	29000000	19200000	0	0	0	0	0	0	12800000	0	0	0	0
Q5SX40	Myosin-1	Myh1	R.KKHADSVAELGEQIDNLQR.V	1201	1219		43600000	19000000	58300000	42700000	37300000	26800000	13300000	31600000	35700000	11600000	6510000	837000	0	0
Q5SX40	Myosin-1	Myh1	E.EAEERADIAESQVNKLR.V	1912	1928		38400000	22000000	12800000	13700000	2870000	3170000	0	16500000	8430000	3670000	0	0	0	0
Q5SX40	Myosin-1	Myh1	D.LEEATLQHEATAA.T	1185	1197		7910000	3070000	3150000	3250000	1710000	0	0	0	3280000	2070000	9810000	3490000	2160000	2240000
Q5SX40	Myosin-1	Myh1	K.ILAEWKQK.Y	1459	1466		4760000	6420000	8440000	7340000	6190000	5300000	10100000	2040000	6140000	2900000	3690000	3890000	0	4540000
Q5SX40	Myosin-1	Myh1	N.FDKILA.E	1456	1461		0	1540000	2900000	3750000	6280000	7430000	7480000	547000	3540000	4350000	5180000	3860000	4660000	3440000
Q5SX40	Myosin-1	Myh1	I.SERLEEAGGATSAQIEM(+15.99)NKKR.E	1154	1174		17900000	9000000	8940000	0	0	0	0	0	0	0	0	0	0	0
Q5SX40	Myosin-1	Myh1	R.LQDLVDKLQ.S	1871	1879		2650000	5340000	6680000	6460000	9560000	10700000	10000000	2510000	0	17200000	6130000	4130000	19200000	6810000
Q5SX40	Myosin-1	Myh1	R.KIAEQELLDASERV.Q	1707	1720		11300000	17700000	17200000	15300000	16300000	11400000	3420000	30700000	27600000	22800000	7830000	8240000	9110000	1950000
Q5SX40	Myosin-1	Myh1	D.EEEINAELTAKKR.K	936	948		7000000	8250000	5990000	5820000	2810000	13200000	0	0	0	0	0	0	0	0
Q5SX40	Myosin-1	Myh1	K.SEMKMEIDDLA.S	1229	1239		4140000	9180000	1770000	9110000	6980000	4930000	0	5920000	5660000	10100000	9060000	2870000	2570000	493000
Q5SX40	Myosin-1	Myh1	I.EELEEEIEAERA.S	1123	1134		0	1590000	2990000	5320000	4460000	5630000	5110000	1630000	4970000	4270000	4610000	3970000	3810000	3150000
Q5SX40	Myosin-1	Myh1	D.LEGSLEQEKK.I	1041	1050		38500000	0	0	0	15800000	0	0	0	0	0	0	0	0	0
Q5SX40	Myosin-1	Myh1	K.SEMKMEI.D	1229	1235		3200000	4930000	4560000	4720000	8880000	6640000	7130000	1580000	1980000	2310000	1620000	0	0	0
Q5SX40	Myosin-1	Myh1	R.KLEDEC(+57.02)SELKK.D	949	959		0	20400000	2000000	2700000	4700000	4750000	17200000	0	0	0	0	832000	1440000	0
Q5SX40	Myosin-1	Myh1	D.DLQAEEDKVN.T	1016	1025		10200000	13000000	10900000	14500000	13300000	15900000	15200000	7250000	9060000	7590000	9900000	8590000	11200000	14700000
Q5SX40	Myosin-1	Myh1	R.EAEFQKM.R	1175	1181		1760000	1890000	3250000	3130000	2650000	5580000	3110000	3470000	3040000	4470000	3870000	0	1940000	5650000
Q5SX40	Myosin-1	Myh1	R.KIQHELEEAEER.A	1905	1916		4050000	3150000	5260000	9660000	0	9730000	0	8050000	5210000	6270000	4810000	509000	2780000	0
Q5SX40	Myosin-1	Myh1	L.DETIAKLTK.E	993	1001		2790000	10100000	11300000	7510000	6400000	6450000	2040000	3320000	904000	0	0	0	0	0
Q5SX40	Myosin-1	Myh1	K.NLTEEMA.G	984	990		2880000	3830000	3720000	1310000	3600000	4690000	4800000	2690000	0	1720000	3430000	1600000	4540000	3220000
Q5SX40	Myosin-1	Myh1	N.PPKYDKIEDMA.M	82	92		4790000	3320000	2660000	2580000	8820000	3930000	7670000	8790000	7660000	2920000	0	0	1360000	0
Q5SX40	Myosin-1	Myh1	K.ELTYQTEEDRKN.V	1856	1867		12800000	5030000	0	6980000	334000	4320000	0	10900000	5030000	2370000	6340000	1460000	1450000	6290000
Q5SX40	Myosin-1	Myh1	R.IEELEEEIEAERA.S	1122	1134		49600000	127000000	155000000	194000000	194000000	176000000	136000000	173000000	286000000	305000000	292000000	268000000	242000000	178000000
Q5SX40	Myosin-1	Myh1	A.RIEELEEEIEA.E	1121	1131		0	0	0	4350000	3960000	4440000	3560000	0	2330000	2540000	2870000	5640000	5720000	9780000
Q5SX40	Myosin-1	Myh1	D.ETIAKLTK.E	994	1001		7110000	7700000	5050000	6100000	5690000	0	0	0	0	0	0	0	0	0
Q5SX40	Myosin-1	Myh1	D.LELTLAK.V	964	970		8890000	5640000	6540000	3170000	1500000	632000	389000	4900000	1650000	1500000	0	0	0	0
Q5SX40	Myosin-1	Myh1	K.KALQEAHQQTLDDLQA.E	1004	1019		6820000	9060000	15000000	18900000	21500000	21700000	20500000	5990000	11500000	4850000	6990000	5460000	2760000	491000
Q5SX40	Myosin-1	Myh1	D.LLREQYE.E	1349	1355		0	7750000	0	3600000	23700000	3490000	6290000	0	0	0	0	0	0	0
Q5SX40	Myosin-1	Myh1	D.SVAELGEQIDNLQR.V	1206	1219		33100000	31100000	38100000	43400000	33200000	53600000	19300000	41800000	24800000	72200000	29200000	18900000	16800000	9860000
Q5SX40	Myosin-1	Myh1	N.EVEDLMIDVERT.N	1431	1442		11700000	3310000	27200000	11800000	17600000	14600000	18100000	9220000	5550000	14600000	12600000	12600000	19100000	14300000
Q5SX40	Myosin-1	Myh1	I.LAEWKQK.Y	1460	1466		9210000	3540000	2870000	0	11500000	6390000	12500000	0	0	0	0	0	0	0
Q5SX40	Myosin-1	Myh1	G.EQIDNLQR.V	1212	1219		8320000	0	0	2150000	0	9430000	2040000	0	0	4100000	0	0	6120000	0
Q5SX40	Myosin-1	Myh1	K.KAITDAAMMAEELKKEQDTSAHLER.M	1764	1788		25600000	0	0	0	0	0	0	0	0	0	0	0	0	0
Q5SX40	Myosin-1	Myh1	M.AEELKKEQDTSAHLER.M	1773	1788		94500000	114000000	104000000	66400000	98300000	70900000	73800000	71000000	47900000	43100000	27500000	15900000	13900000	5580000
Q5SX40	Myosin-1	Myh1	E.LEEEIEAERA.S	1125	1134		0	0	6120000	4030000	6740000	5320000	5720000	0	0	0	3580000	2580000	2580000	5780000
Q5SX40	Myosin-1	Myh1	T.EELEEAKKKLAQR.L	1391	1403		14500000	6020000	0	0	0	0	0	0	0	0	0	0	0	0
Q5SX40	Myosin-1	Myh1	K.SEMKMEIDDLAS.N	1229	1240		7660000	10900000	8990000	11500000	6060000	4440000	3530000	13700000	11700000	11400000	5840000	2610000	668000	0
Q5SX40	Myosin-1	Myh1	R.DLEEATLQHEATAA.T	1184	1197		156000000	47600000	39300000	12300000	6470000	1900000	1330000	5310000	3530000	571000	0	0	0	0
Q5SX40	Myosin-1	Myh1	R.LQNEVEDLM.I	1428	1436		0	1030000	1220000	2000000	2500000	2850000	4610000	404000	1480000	1870000	3980000	3740000	6320000	8340000
Q5SX40	Myosin-1	Myh1	L.GEQIDNLQRVK.Q	1211	1221		8580000	9710000	4180000	14800000	12800000	8430000	15800000	1350000	2610000	1440000	5440000	4590000	0	0
Q5SX40	Myosin-1	Myh1	A.EERADIAESQVNKLR.V	1914	1928		19400000	23100000	25400000	22900000	16400000	11600000	11000000	13400000	8310000	2910000	0	0	0	0
Q5SX40	Myosin-1	Myh1	K.ELEEKMV.A	879	885		4690000	3850000	3960000	2920000	3290000	2040000	2120000	4160000	2660000	1670000	0	0	1810000	0
Q5SX40	Myosin-1	Myh1	R.IEELEEEIEAERASRAKAEKQR.S	1122	1143		26800000	1660000	0	0	0	0	0	0	0	0	0	0	0	0
Q5SX40	Myosin-1	Myh1	K.IQHELEEAEERADIAESQVNKLR.V	1906	1928		29100000	14200000	10000000	3260000	0	0	0	10600000	3960000	0	0	0	0	0
Q5SX40	Myosin-1	Myh1	L.GEQIDNLQR.V	1211	1219		2440000	11600000	11100000	14900000	16000000	24300000	44300000	4300000	12700000	17400000	26600000	19900000	22500000	24900000
Q5SX40	Myosin-1	Myh1	R.KIQHELEEAEERA.D	1905	1917		46400000	55900000	59500000	59200000	59700000	37400000	18600000	58400000	74900000	53000000	65000000	48500000	36100000	9800000
Q5SX40	Myosin-1	Myh1	E.EEINAELTAKKR.K	937	948		6230000	4280000	5740000	4030000	4390000	5320000	1000000	0	0	0	0	0	0	0
Q5SX40	Myosin-1	Myh1	A.EELKKEQDTSAHLER.M	1774	1788		1160000000	1190000000	1190000000	946000000	865000000	897000000	841000000	993000000	776000000	731000000	592000000	475000000	289000000	191000000
Q5SX40	Myosin-1	Myh1	R.RDLEEAT.L	1183	1189		0	13200000	13800000	18600000	25400000	21900000	28600000	18000000	43100000	39700000	41300000	23500000	37000000	27700000
Q5SX40	Myosin-1	Myh1	K.IQLEAKI.K	920	926		6000000	5720000	3640000	2860000	2530000	990000	0	3320000	1260000	0	0	0	0	0
Q5SX40	Myosin-1	Myh1	K.MRRDLEEATLQHEAT.A	1181	1195		6960000	6120000	6980000	5790000	0	0	0	0	0	0	0	0	0	0
Q5SX40	Myosin-1	Myh1	R.KLEGDLKL.A	1061	1068		2710000	1560000	2010000	1620000	0	1710000	1790000	4650000	4790000	5010000	3620000	3510000	2100000	0
Q5SX40	Myosin-1	Myh1	E.LEEEIEAER.A	1125	1133		0	3430000	0	0	0	3030000	3140000	0	0	0	0	7300000	7080000	10900000
Q5SX40	Myosin-1	Myh1	R.IEELEEEIEAERASRAKAEK.Q	1122	1141		39800000	13900000	5130000	971000	1210000	0	0	3440000	0	0	0	0	0	0
Q5SX40	Myosin-1	Myh1	T.HLHEPAVLYNLK.E	96	107		9970000	6620000	0	2520000	5280000	0	0	1850000	0	0	0	0	0	0
Q5SX40	Myosin-1	Myh1	R.LQNEVEDLMIDVERTN.A	1428	1443		18800000	12200000	9650000	7370000	5510000	1520000	0	18300000	11800000	4100000	2340000	0	0	0
Q5SX40	Myosin-1	Myh1	A.EWKQKYEETHAELEA.S	1462	1476		12600000	3410000	2540000	9150000	0	1480000	436000	6490000	0	0	0	0	0	0
Q5SX40	Myosin-1	Myh1	K.RKLEGDLKLA.Q	1060	1069		12100000	5870000	3620000	2100000	2410000	1860000	1430000	3210000	0	0	0	0	0	0
Q5SX40	Myosin-1	Myh1	D.LEEATLQHEATA.A	1185	1196		4060000	4980000	7940000	1430000	1470000	0	833000	0	429000	0	0	0	0	0
Q5SX40	Myosin-1	Myh1	N.EVEDLMIDVERTN.A	1431	1443		0	0	0	4380000	6260000	9700000	8270000	1580000	3800000	3240000	3190000	2990000	1930000	2020000
Q5SX40	Myosin-1	Myh1	A.RIEELEEEIEAERAS.R	1121	1135		839000	6360000	5570000	8020000	7300000	6070000	6660000	5500000	3820000	6190000	6540000	3190000	2790000	0
Q5SX40	Myosin-1	Myh1	D.LMIDVER.T	1435	1441		0	601000	0	0	0	836000	1130000	2260000	2190000	2320000	3960000	0	13500000	3650000
Q5SX40	Myosin-1	Myh1	R.KLEDEC(+57.02)SELKKDIDDLELT.L	949	967		38300000	30700000	34600000	19300000	34300000	29600000	31400000	47100000	38400000	43200000	32800000	26300000	18700000	13400000
Q5SX40	Myosin-1	Myh1	R.IHELEKIK.K	1530	1537		3110000	3960000	3360000	0	0	0	0	6580000	4500000	0	0	0	0	0
Q5SX40	Myosin-1	Myh1	K.TPGAMEHELV.L	687	696		0	0	0	3940000	0	0	0	2120000	0	3860000	4110000	4170000	5360000	5960000
Q5SX40	Myosin-1	Myh1	T.KYETDAI.Q	1381	1387		5310000	1260000	0	0	0	0	6750000	0	0	0	3250000	2020000	4210000	8180000
Q5SX40	Myosin-1	Myh1	K.KLETDISQIQGEMEDI.V	1736	1751		1940000	4610000	4020000	6580000	5300000	2940000	1670000	602000	0	780000	997000	0	0	0
Q5SX40	Myosin-1	Myh1	R.ELEEISERLEEAGGA.T	1149	1163		2020000	3470000	2630000	0	0	0	0	7720000	3320000	1670000	0	0	0	784000
Q5SX40	Myosin-1	Myh1	L.EEISERLEEAGGATSA.Q	1151	1166		3350000	0	6410000	4620000	0	0	4580000	4570000	0	0	0	0	0	0
Q5SX40	Myosin-1	Myh1	A.TLQHEATAA.T	1189	1197		30300000	0	0	0	0	0	0	0	0	0	0	0	0	0
Q5SX40	Myosin-1	Myh1	R.GKQAFTQQIEELK.R	1311	1323		3330000	766000	2050000	6460000	0	0	0	1930000	4590000	3960000	0	4320000	0	0
Q5SX40	Myosin-1	Myh1	R.LDEAEQLALKGGK.K	1804	1816		24400000	30600000	36000000	37200000	35500000	35000000	27300000	45500000	50400000	49200000	30300000	30000000	19000000	14000000
Q5SX40	Myosin-1	Myh1	V.AELGEQIDNLQRV.K	1208	1220		0	418000	0	0	4730000	6100000	4710000	2940000	2280000	4050000	3780000	5010000	3680000	3290000
Q5SX40	Myosin-1	Myh1	K.IQHELEEAEERADIAES.Q	1906	1922		5820000	6580000	2520000	1660000	0	499000	0	6010000	3440000	2800000	0	0	0	0
Q5SX40	Myosin-1	Myh1	K.KALQEAHQQTL.D	1004	1014		0	1170000	1430000	1960000	1830000	2320000	2980000	0	2310000	3150000	3120000	3100000	2430000	2000000
Q5SX40	Myosin-1	Myh1	R.IEELEEEIEAERASRA.K	1122	1137		5050000	5560000	4050000	0	0	0	0	3890000	0	0	0	0	0	0
Q5SX40	Myosin-1	Myh1	S.RHDC(+57.02)DLL.R	1344	1350		0	0	0	0	0	0	0	0	0	0	0	0	0	6000000
Q5SX40	Myosin-1	Myh1	R.LEEAGGATSAQIEMNKKR.E	1157	1174		2760000	2010000	14000000	5790000	0	0	0	0	0	0	0	0	0	0
Q5SX40	Myosin-1	Myh1	K.DLQHRLDEAEQL.A	1799	1810		8370000	13800000	14500000	17200000	19400000	13700000	14200000	3110000	12500000	10300000	17800000	8900000	5980000	6840000
Q5SX40	Myosin-1	Myh1	T.HLHEPAVLYNLKER.Y	96	109		9710000	3970000	0	791000	0	0	0	0	0	0	0	0	0	0
Q5SX40	Myosin-1	Myh1	R.MAAEALR.N	1642	1648		15400000	13900000	0	8170000	6700000	5380000	9740000	12900000	11600000	9530000	0	0	1730000	0
Q5SX40	Myosin-1	Myh1	K.HADSVAELGEQI.D	1203	1214		8540000	11400000	15500000	11700000	9300000	11000000	9060000	1980000	7560000	14000000	12500000	8020000	7890000	5140000
Q5SX40	Myosin-1	Myh1	K.ALC(+57.02)YPR.V	401	406		0	2570000	0	0	1480000	2720000	0	0	3360000	6150000	5280000	0	2220000	1980000
Q5SX40	Myosin-1	Myh1	K.AITDAAMMAEELKKEQDTSAHLER.M	1765	1788		21000000	0	2730000	0	0	0	0	0	0	0	0	0	0	0
Q5SX40	Myosin-1	Myh1	E.GSLEQEKKIR.M	1043	1052		2860000	4050000	2890000	1780000	3050000	3380000	2280000	1490000	1410000	0	0	0	0	0
Q5SX40	Myosin-1	Myh1	R.RDLEEATL.Q	1183	1190		0	5140000	0	2390000	3250000	2390000	1550000	6590000	0	0	0	0	0	0
Q5SX40	Myosin-1	Myh1	V.DDLEGSLEQEKKIR.M	1039	1052		308000000	342000000	313000000	304000000	325000000	310000000	262000000	234000000	195000000	139000000	51900000	57200000	27300000	16200000
Q5SX40	Myosin-1	Myh1	E.LEEEIEAERASR.A	1125	1136		0	8220000	5860000	6110000	6930000	2680000	2130000	0	2890000	0	0	0	0	0
Q5SX40	Myosin-1	Myh1	A.VLYNLKER.Y	102	109		2210000	2880000	1670000	1200000	1350000	0	0	5700000	2270000	0	0	0	0	0
Q5SX40	Myosin-1	Myh1	K.EKSEMKMEI.D	1227	1235		3630000	2780000	3070000	3060000	3910000	4990000	2930000	0	0	0	0	0	0	0
Q5SX40	Myosin-1	Myh1	L.EGSLEQEKKIR.M	1042	1052		4310000	4440000	2210000	0	1980000	1800000	3910000	0	1340000	0	0	0	0	621000
Q5SX40	Myosin-1	Myh1	G.NLEKMC(+57.02)R.T	1251	1257	Carbamidomethylation	0	4060000	8280000	3880000	0	0	1020000	0	0	0	0	0	0	0
Q5SX40	Myosin-1	Myh1	A.DIAESQVNKL.R	1918	1927		0	5570000	0	3050000	3480000	0	0	0	5800000	0	5070000	0	1480000	816000
Q5SX40	Myosin-1	Myh1	T.LDDLQAEEDKVN.T	1014	1025		3510000	3780000	5030000	8750000	4210000	6000000	2170000	8360000	9980000	7490000	7390000	7380000	8880000	5930000
Q5SX40	Myosin-1	Myh1	A.SERVQLL.H	1717	1723		994000	3200000	1670000	2270000	2040000	2910000	2610000	2210000	377000	0	0	0	3350000	0
Q5SX40	Myosin-1	Myh1	R.NFDKILAEWKQKYEETHAELEA.S	1455	1476		17600000	12100000	2040000	0	0	0	0	8530000	0	0	0	0	0	0
Q5SX40	Myosin-1	Myh1	K.YEETHAEL.E	1467	1474		0	0	0	0	4670000	2850000	3960000	0	4480000	0	3610000	3000000	2200000	0
Q5SX40	Myosin-1	Myh1	R.RDLEEATLQHEATAA.T	1183	1197		20700000	0	5330000	0	0	0	0	0	0	0	0	0	0	0
Q5SX40	Myosin-1	Myh1	V.TERAEDEEEI.N	930	939		0	0	0	0	0	4550000	2950000	0	3600000	2160000	7010000	6200000	2060000	5150000
Q5SX40	Myosin-1	Myh1	D.DLQAEEDKVNTLTK.A	1016	1029		23400000	54900000	55300000	77500000	79200000	56300000	31900000	38100000	46600000	58500000	47700000	32300000	27200000	18300000
Q5SX40	Myosin-1	Myh1	R.ELEEISERLEEAGGATSAQIEMNKKR.E	1149	1174		20300000	1540000	0	0	0	0	0	3990000	0	0	0	0	0	0
Q5SX40	Myosin-1	Myh1	R.KIQHELEEAEERADIAESQV.N	1905	1924		4790000	0	2320000	0	0	0	0	5090000	0	0	0	0	0	0
Q5SX40	Myosin-1	Myh1	A.EIEELRAT.L	1691	1698		0	0	0	0	8820000	11700000	0	0	0	0	1450000	0	0	1270000
Q5SX40	Myosin-1	Myh1	A.EELKKEQDTSAHLE.R	1774	1787		0	0	808000	2120000	0	969000	1160000	0	5230000	5490000	6400000	0	3790000	8140000
Q5SX40	Myosin-1	Myh1	D.IAESQVNKLR.V	1919	1928		21000000	21400000	14900000	5990000	8500000	12300000	4210000	16800000	6410000	2430000	756000	0	0	0
Q5SX40	Myosin-1	Myh1	I.AEQELLDASERV.Q	1709	1720		0	0	0	0	9420000	0	0	2510000	0	1550000	0	4460000	1510000	2720000
Q5SX40	Myosin-1	Myh1	I.SANPLLEAFGNAK.T	225	237		981000	0	0	1850000	1680000	2150000	3130000	1480000	995000	2560000	1410000	3200000	765000	0
Q5SX40	Myosin-1	Myh1	K.LEDEC(+57.02)SELKKDIDDLELT.L	950	967	Carbamidomethylation	0	2570000	2170000	2420000	2070000	0	1820000	1890000	1800000	0	2100000	730000	1320000	1560000
Q5SX40	Myosin-1	Myh1	I.EELKRQLEEEIKAK.S	1320	1333		4070000	4010000	2760000	1420000	0	0	0	2830000	0	0	0	0	0	0
Q5SX40	Myosin-1	Myh1	V.DDLEGSLEQEK.K	1039	1049		20800000	30100000	24600000	39500000	33500000	48500000	56400000	20400000	45400000	38200000	58300000	72200000	85000000	101000000
Q5SX40	Myosin-1	Myh1	K.IAEQELLDASERVQLLHTQNT.S	1708	1728		5250000	5660000	3980000	2390000	0	0	0	0	0	0	0	0	0	0
Q5SX40	Myosin-1	Myh1	K.EEEQQRLI.N	1270	1277		0	2450000	0	3330000	0	0	0	0	0	2760000	5440000	1950000	2970000	2510000
Q5SX40	Myosin-1	Myh1	V.FGEAAPYLRKSEK.E	10	22		10500000	10100000	13500000	19600000	15200000	16000000	27000000	0	7060000	1210000	2780000	6800000	0	3760000
Q5SX40	Myosin-1	Myh1	R.ADIAESQVNKLR.V	1917	1928		19700000	27500000	35800000	29300000	28100000	15900000	12000000	12600000	15700000	15700000	7210000	4690000	726000	1570000
Q5SX40	Myosin-1	Myh1	I.AESQVNKLR.V	1920	1928		3010000	3130000	3920000	1010000	6560000	4000000	3990000	0	2030000	2490000	1380000	745000	536000	1570000
Q5SX40	Myosin-1	Myh1	V.AELGEQIDNLQR.V	1208	1219		114000000	75400000	162000000	190000000	182000000	171000000	161000000	201000000	224000000	229000000	225000000	200000000	175000000	129000000
Q5SX40	Myosin-1	Myh1	R.KIQHELEEAEERADIAES.Q	1905	1922		13200000	10900000	10500000	522000	0	0	0	17000000	2100000	1960000	1340000	0	0	0
Q5SX40	Myosin-1	Myh1	V.AELGEQIDNLQ.R	1208	1218		0	0	4160000	0	2330000	0	0	1040000	6610000	7640000	7530000	7500000	7050000	8300000
Q5SX40	Myosin-1	Myh1	T.LDDLQAEEDKV.N	1014	1024		0	1560000	0	4050000	5010000	7760000	13500000	2560000	7030000	6840000	14100000	19900000	26300000	26100000
Q5SX40	Myosin-1	Myh1	K.ELQARIEELEEEIEAERASRAKAEKQR.S	1117	1143		0	0	0	0	0	0	0	0	0	0	0	0	0	0
Q5SX40	Myosin-1	Myh1	R.ANLLQAEIEELRA.T	1685	1697		0	12700000	0	6930000	6830000	3540000	2440000	1030000	1570000	9760000	897000	1460000	0	0
Q5SX40	Myosin-1	Myh1	K.DTQLHLDDALRGQEDLKEQLA.M	1659	1679		2200000	3930000	2090000	0	6080000	2070000	9380000	10800000	8220000	11500000	4520000	6110000	5410000	7030000
Q5SX40	Myosin-1	Myh1	R.KKHADSVAELGEQI.D	1201	1214		948000	1370000	3910000	2290000	1820000	1350000	404000	4630000	4650000	3180000	1260000	1120000	0	0
Q5SX40	Myosin-1	Myh1	V.DDLEGSLEQEKKI.R	1039	1051		4900000	5530000	8320000	9820000	16000000	18400000	18800000	10300000	12600000	17300000	20300000	16000000	15300000	11000000
Q5SX40	Myosin-1	Myh1	R.ELEEISERLEEAGGATSA.Q	1149	1166		84700000	39900000	44000000	14600000	3770000	735000	117000	40100000	6510000	5800000	0	0	0	0
Q5SX40	Myosin-1	Myh1	R.RANLLQAEIEELRAT.L	1684	1698		2310000	8180000	1970000	0	2000000	573000	0	10800000	8060000	4980000	0	0	0	0
Q5SX40	Myosin-1	Myh1	R.KIAEQELLDASERVQLLHTQNT.S	1707	1728		6300000	6410000	1580000	2160000	0	0	0	3180000	0	0	0	0	0	0
Q5SX40	Myosin-1	Myh1	C.DLLREQY.E	1348	1354		1030000	0	2590000	0	1660000	2160000	0	0	0	2420000	0	2150000	0	4990000
Q5SX40	Myosin-1	Myh1	A.GLDETIAKLTKEK.K	991	1003		6630000	0	0	2220000	2340000	15500000	1200000	1730000	1610000	0	1460000	547000	0	0
Q5SX40	Myosin-1	Myh1	D.SVAELGEQIDNLQRVK.Q	1206	1221		58200000	48700000	37600000	52400000	18700000	24600000	13800000	22300000	9570000	0	0	0	787000	0
Q5SX40	Myosin-1	Myh1	K.ELQARIEELEEEIEAERASRAK.A	1117	1138		53500000	3420000	11700000	1550000	0	0	0	10000000	6390000	2430000	1000000	0	0	0
Q5SX40	Myosin-1	Myh1	D.AEERC(+57.02)DQLIKTK.I	908	919	Carbamidomethylation	3710000	4540000	0	4450000	0	0	0	0	0	0	0	0	0	0
Q5SX40	Myosin-1	Myh1	A.LAHALQSSR.H	1336	1344		3050000	3260000	3160000	3170000	2030000	0	0	0	1320000	0	0	0	0	0
Q5SX40	Myosin-1	Myh1	K.KALQEAHQQTLDDLQAEEDKVNTLTKAK.I	1004	1031		7750000	0	0	0	0	0	0	0	0	0	0	0	0	0
Q5SX40	Myosin-1	Myh1	K.DTQLHLDDALR.G	1659	1669		0	4530000	0	420000	351000	0	574000	0	2370000	5460000	4540000	4820000	6270000	5580000
Q5SX40	Myosin-1	Myh1	L.QAEIEELR.A	1689	1696		0	0	0	0	0	0	0	2950000	0	0	0	4510000	9440000	0
Q5SX40	Myosin-1	Myh1	R.TEELEEAKKKLAQR.L	1390	1403		27900000	0	5720000	0	0	0	0	0	0	0	0	0	0	0
Q5SX40	Myosin-1	Myh1	T.KEEEQQRLI.N	1269	1277		0	0	0	2620000	2910000	8580000	17800000	0	0	0	0	0	0	0
Q5SX40	Myosin-1	Myh1	I.SQIQGEMEDI.V	1742	1751		0	0	0	0	1270000	1630000	0	0	0	1090000	1800000	3080000	3510000	3820000
Q5SX40	Myosin-1	Myh1	L.MIDVERT.N	1436	1442		0	0	0	0	2200000	2420000	5530000	0	0	0	0	0	4570000	1420000
Q5SX40	Myosin-1	Myh1	K.KAITDAAMMA.E	1764	1773		22700000	11300000	13800000	13300000	5480000	2130000	4340000	12800000	7740000	14400000	5540000	7340000	0	0
Q5SX40	Myosin-1	Myh1	K.KAITDAAM(+15.99)MAEELKKEQDTSAHLER.M	1764	1788	Oxidation (M)	4820000	0	0	0	0	0	0	0	0	0	0	0	0	0
Q5SX40	Myosin-1	Myh1	I.EELKRQLEEEI.K	1320	1330		0	7380000	10500000	8100000	2850000	14000000	14400000	4030000	1980000	328000	0	0	0	0
Q5SX40	Myosin-1	Myh1	A.VLYNLKE.R	102	108		0	988000	738000	944000	809000	722000	0	2130000	1710000	1460000	1510000	1400000	618000	0
Q5SX40	Myosin-1	Myh1	R.KIQHELEEAEERADIA.E	1905	1920		2570000	2150000	0	1410000	0	0	0	3030000	2700000	1950000	0	0	0	0
Q5SX40	Myosin-1	Myh1	K.KHADSVAELGEQI.D	1202	1214		0	4680000	1460000	1760000	1530000	0	0	1720000	1550000	1170000	0	0	0	0
Q5SX40	Myosin-1	Myh1	K.KALQEAHQQTLDDLQAEEDKVNTLTK.A	1004	1029		44700000	42800000	38200000	32400000	13900000	10400000	0	23300000	10900000	7720000	9140000	2930000	7520000	5790000
Q5SX40	Myosin-1	Myh1	K.DLQHRLDEAEQLALKGGKK.Q	1799	1817		5200000	2140000	2230000	0	0	0	0	0	0	0	0	0	0	0
Q5SX40	Myosin-1	Myh1	N.PLLEAFGNAK.T	228	237		0	1770000	0	0	1240000	0	0	0	0	0	0	0	0	0
Q5SX40	Myosin-1	Myh1	K.DIDDLELT.L	960	967		0	808000	545000	692000	1310000	1570000	1590000	667000	776000	0	1010000	1400000	2340000	1600000
Q5SX40	Myosin-1	Myh1	E.LGEQIDNLQRVK.Q	1210	1221		0	48000000	46600000	56100000	55600000	7470000	47600000	0	21400000	17900000	13800000	12300000	10200000	6090000
Q5SX40	Myosin-1	Myh1	R.TLEDQVSELK.T	1258	1267		10300000	18800000	21200000	17600000	16200000	16300000	20000000	14400000	19300000	22100000	26000000	28600000	30600000	32400000
Q5SX40	Myosin-1	Myh1	A.EELKKEQDTSAHLERMK.K	1774	1790		5630000	0	0	0	0	0	0	951000	0	0	0	0	0	0
Q5SX40	Myosin-1	Myh1	V.KDLQHRLDEAEQLALKGGKK.Q	1798	1817		8260000	0	0	0	0	0	0	0	0	0	0	0	0	0
Q5SX40	Myosin-1	Myh1	K.YETDAIQRT.E	1382	1390		32800000	49300000	37300000	65600000	85500000	82600000	94000000	43500000	27900000	32700000	18500000	12100000	34700000	16400000
Q5SX40	Myosin-1	Myh1	R.ELEEISERLEEAGGAT.S	1149	1164		72900000	62700000	66300000	33000000	15000000	8900000	3940000	66600000	28200000	21400000	8240000	5570000	5150000	7610000
Q5SX40	Myosin-1	Myh1	R.TKYETDAIQRTEELEEAKKKLAQR.L	1380	1403		38700000	5920000	0	0	0	0	0	0	0	0	0	0	0	0
Q5SX40	Myosin-1	Myh1	E.EMAGLDETIAKLTK.E	988	1001		1060000	1250000	2830000	2400000	1220000	0	0	1560000	552000	0	0	0	0	0
Q5SX40	Myosin-1	Myh1	K.ILAEWKQKYEETHAELEA.S	1459	1476		3300000	3310000	0	4170000	0	0	0	0	0	0	0	0	0	0
Q5SX40	Myosin-1	Myh1	R.HDC(+57.02)DLLR.E	1345	1351	Carbamidomethylation	107000000	108000000	128000000	42000000	158000000	153000000	145000000	25000000	123000000	135000000	181000000	214000000	135000000	159000000
Q5SX40	Myosin-1	Myh1	K.IKELQARIEELEEEIEAERASRAK.A	1115	1138		2560000	0	0	0	0	0	0	0	0	0	0	0	0	0
Q5SX40	Myosin-1	Myh1	K.KHADSVAELGEQIDNLQRVK.Q	1202	1221		28700000	1470000	9100000	3450000	0	0	0	0	0	0	0	0	0	0
Q5SX40	Myosin-1	Myh1	R.IQLELNQVK.S	1568	1576		0	0	0	0	0	0	0	0	2170000	6870000	0	4310000	0	0
Q5SX40	Myosin-1	Myh1	D.DLQAEEDKVNT.L	1016	1026		0	0	0	0	4510000	3550000	0	0	0	0	5220000	0	0	0
Q5SX40	Myosin-1	Myh1	K.ALQEAHQQTLDDLQAEEDKV.N	1005	1024		0	0	0	0	0	3750000	4930000	0	0	0	3050000	2690000	329000	288000
Q5SX40	Myosin-1	Myh1	R.SLSTELFK.I	1483	1490		81200000	97700000	92200000	84200000	109000000	92500000	85400000	95900000	113000000	113000000	112000000	106000000	94800000	112000000
Q5SX40	Myosin-1	Myh1	T.LDDLQAEEDKVNTLTK.A	1014	1029		18300000	20100000	24900000	24000000	32600000	22500000	19100000	14000000	14200000	30100000	25600000	15400000	15600000	12100000
Q5SX40	Myosin-1	Myh1	R.GQEDLKEQLA.M	1670	1679		0	0	0	0	0	0	22400000	15900000	3940000	2350000	6090000	2740000	32900000	10600000
Q5SX40	Myosin-1	Myh1	E.SFVKATVQSR.E	46	55		0	0	3800000	3830000	0	1670000	0	0	0	0	351000	0	0	0
Q5SX40	Myosin-1	Myh1	K.YETDAIQRTEELEEAKKKLAQR.L	1382	1403		18000000	1130000	0	0	0	0	0	0	0	0	0	0	0	0
Q5SX40	Myosin-1	Myh1	D.C(+57.02)DLLREQY.E	1347	1354	Carbamidomethylation	0	0	737000	2460000	1230000	1310000	3080000	0	0	2300000	1370000	0	0	0
Q5SX40	Myosin-1	Myh1	Q.AFTQQIEELKR.Q	1314	1324		0	0	7040000	4230000	1400000	2580000	0	0	0	0	0	0	0	0
Q5SX40	Myosin-1	Myh1	I.EELEEEIEAERASR.A	1123	1136		4210000	3030000	4010000	7670000	0	0	0	6940000	2420000	0	0	0	0	0
Q5SX40	Myosin-1	Myh1	N.FDKILAEWK.Q	1456	1464		3110000	5540000	9170000	8340000	5620000	6200000	2760000	10400000	1780000	6910000	0	5840000	0	1440000
Q5SX40	Myosin-1	Myh1	K.LEKEKSEMKM.E	1224	1233		11800000	0	0	0	0	0	0	0	0	0	0	0	0	0
Q5SX40	Myosin-1	Myh1	A.GLDETIAKLT.K	991	1000		10500000	3860000	8960000	0	551000	3690000	0	10100000	0	841000	3370000	3320000	3980000	8380000
Q5SX40	Myosin-1	Myh1	D.EEEINAELTAK.K	936	946		2170000	2040000	4540000	0	0	0	0	0	0	0	0	0	0	0
Q5SX40	Myosin-1	Myh1	R.IEELEEEI.E	1122	1129		1580000	0	6880000	9020000	19700000	31300000	40200000	1980000	10100000	14500000	13800000	14300000	24800000	28600000
Q5SX40	Myosin-1	Myh1	K.KKMEGDLNEMEI.Q	1623	1634		6360000	6180000	4870000	4230000	4350000	4500000	3610000	4540000	4380000	6110000	3510000	5320000	2620000	4860000
Q5SX40	Myosin-1	Myh1	Q.VDDLEGSLEQEKK.I	1038	1050		0	0	0	0	3630000	0	0	0	0	0	0	3980000	0	3420000
Q5SX40	Myosin-1	Myh1	R.VKELTYQTEEDRK.N	1854	1866		0	0	0	0	0	0	0	0	1450000	1540000	0	2750000	1200000	0
Q5SX40	Myosin-1	Myh1	A.DSVAELGEQIDNLQR.V	1205	1219		846000	1720000	1500000	0	1470000	1140000	0	1130000	0	1260000	427000	0	0	0
Q5SX40	Myosin-1	Myh1	T.HLHEPAV.L	96	102		4970000	0	0	0	0	0	1240000	4110000	0	0	0	0	0	0
Q5SX40	Myosin-1	Myh1	K.MQGTLEDQII.S	215	224		0	0	0	0	0	2210000	0	0	0	2640000	0	1890000	0	3500000
Q5SX40	Myosin-1	Myh1	V.EAIKGLR.K	1842	1848		2570000	2650000	0	0	1310000	0	0	0	0	0	0	0	0	0
Q5SX40	Myosin-1	Myh1	A.HQQTLDDLQA.E	1010	1019		0	0	0	0	0	1240000	7560000	0	3080000	1420000	9450000	10700000	10100000	21500000
Q5SX40	Myosin-1	Myh1	A.RIEELEEEIEAERASRAKAEK.Q	1121	1141		2720000	1400000	0	0	0	0	0	0	0	0	0	0	0	0
Q5SX40	Myosin-1	Myh1	R.RANLLQAEIEELR.A	1684	1696		1310000	1450000	1920000	1540000	399000	0	0	2480000	3910000	5560000	2970000	2090000	491000	0
Q5SX40	Myosin-1	Myh1	K.NLTEEMAGLDETIAKLTKEKK.A	984	1004		3740000	0	0	0	0	0	0	0	0	0	0	0	0	0
Q5SX40	Myosin-1	Myh1	R.LQNEVEDLM(+15.99)IDVERT.N	1428	1442	Oxidation (M)	0	2400000	710000	2590000	0	0	0	0	3730000	1220000	1860000	2380000	1170000	684000
Q5SX40	Myosin-1	Myh1	R.LQNEVEDLMID.V	1428	1438		0	0	0	8080000	1330000	0	0	0	0	0	0	0	0	0
Q5SX40	Myosin-1	Myh1	R.HDC(+57.02)DLLREQYE.E	1345	1355	Carbamidomethylation	0	0	0	0	9370000	0	0	0	0	0	0	0	0	0
Q5SX40	Myosin-1	Myh1	I.QRTEELEEA.K	1388	1396		0	0	0	0	0	0	0	0	0	0	0	0	5250000	4120000
Q5SX40	Myosin-1	Myh1	V.KDLQHRLDEAEQL.A	1798	1810		26800000	54400000	48800000	61200000	65200000	64400000	62100000	45700000	24300000	12800000	6460000	4000000	3040000	0
Q5SX40	Myosin-1	Myh1	R.IEELEEEIEAERASR.A	1122	1136		278000000	314000000	327000000	232000000	134000000	57500000	19100000	343000000	131000000	90200000	27000000	13300000	0	9680000
Q5SX40	Myosin-1	Myh1	R.RDLEEATLQHEAT.A	1183	1195		58000000	49500000	58400000	44300000	25500000	23200000	8540000	22200000	8290000	12900000	3730000	0	3290000	3040000
Q5SX40	Myosin-1	Myh1	K.ELTYQTEEDR.K	1856	1865		0	0	0	0	0	0	0	0	0	1290000	1400000	0	2730000	3500000
Q5SX40	Myosin-1	Myh1	A.GLDETIAKLTKEKK.A	991	1004		9660000	5240000	0	0	0	0	0	0	0	0	0	0	0	0
Q5SX40	Myosin-1	Myh1	A.GLDETIAKLTK.E	991	1001		115000000	124000000	123000000	93900000	57600000	45200000	26100000	68400000	24600000	11400000	1420000	0	0	2050000
Q5SX40	Myosin-1	Myh1	K.IAEKDEEIDQLK.R	1583	1594		0	0	0	0	0	0	0	0	2970000	1540000	1610000	1110000	0	1540000
Q5SX40	Myosin-1	Myh1	R.LQNEVEDLM(+15.99)IDVER.T	1428	1441		0	0	0	0	0	0	817000	0	0	0	1540000	2750000	4970000	3640000
Q5SX40	Myosin-1	Myh1	E.EEIEAERASR.A	1127	1136		8680000	0	0	0	0	0	0	0	0	0	0	0	0	0
Q5SX40	Myosin-1	Myh1	K.HADSVAELGEQIDNLQRVKQK.L	1203	1223		4210000	0	0	0	0	0	0	0	0	0	0	0	0	0
Q5SX40	Myosin-1	Myh1	R.IEAQNKPFDA.K	25	34		0	0	0	0	0	2020000	0	3760000	0	0	0	2440000	0	0
Q5SX40	Myosin-1	Myh1	A.EQELLDASERV.Q	1710	1720		0	0	0	0	0	0	0	0	0	0	1690000	1010000	2370000	1850000
Q5SX40	Myosin-1	Myh1	E.AEERADIAESQVNKLR.V	1913	1928		4420000	2630000	9480000	2370000	3430000	1620000	0	0	0	0	0	0	0	0
Q5SX40	Myosin-1	Myh1	K.DIDDLELTLAK.V	960	970		0	0	0	0	0	0	0	0	0	0	0	0	7780000	182000
Q5SX40	Myosin-1	Myh1	R.LQNEVEDLMI.D	1428	1437		0	0	0	0	0	0	0	0	0	1710000	2390000	2470000	1340000	0
Q5SX40	Myosin-1	Myh1	R.TKYETDAIQRTEELEEAKK.K	1380	1398		17500000	9610000	8870000	0	0	0	0	8050000	1980000	0	0	0	0	0
Q5SX40	Myosin-1	Myh1	A.ELGEQIDNLQ.R	1209	1218		0	0	0	0	0	0	0	0	0	0	1210000	1430000	2080000	2820000
Q5SX40	Myosin-1	Myh1	R.KKHADSVAELGEQIDNLQRVK.Q	1201	1221		49600000	33100000	24600000	8100000	2920000	0	0	9360000	0	0	0	0	0	0
Q5SX40	Myosin-1	Myh1	E.LKKEQDTSAHLER.M	1776	1788		0	1480000	992000	0	0	0	0	0	0	1130000	0	0	0	0
Q5SX40	Myosin-1	Myh1	K.IAEKDEEIDQLKR.N	1583	1595		0	0	0	0	0	0	0	0	0	7220000	0	0	0	0
Q5SX40	Myosin-1	Myh1	A.DSVAELGEQIDNLQRVK.Q	1205	1221		1130000	2400000	3410000	1790000	3610000	0	0	2580000	1860000	0	0	0	0	0
Q5SX40	Myosin-1	Myh1	R.LQNEVEDLMIDVER.T	1428	1441		15400000	14400000	15300000	16100000	13200000	9740000	8680000	14500000	18700000	21000000	23000000	19500000	21100000	19500000
Q5SX40	Myosin-1	Myh1	I.EELEEEIEAER.A	1123	1133		0	0	1680000	1760000	2960000	1630000	3600000	0	3120000	1540000	1490000	1800000	3920000	2990000
Q5SX40	Myosin-1	Myh1	K.ALQEAHQQTLDDLQAEEDKVNTLTKAK.I	1005	1031		8530000	5460000	6840000	0	5430000	0	0	1060000	0	0	0	0	0	0
Q5SX40	Myosin-1	Myh1	K.DTQLHLD.D	1659	1665		0	0	0	0	634000	0	980000	0	0	0	1070000	1860000	1450000	925000
Q5SX40	Myosin-1	Myh1	R.LDEAEQLALK.G	1804	1813		0	0	0	0	0	0	0	0	0	0	0	0	0	0
Q5SX40	Myosin-1	Myh1	N.FDKILAEWKQK.Y	1456	1466		0	1960000	2140000	1110000	2020000	554000	1090000	0	0	472000	0	684000	0	0
Q5SX40	Myosin-1	Myh1	E.EMAGLDETIAK.L	988	998		0	0	0	0	0	0	0	0	0	0	3270000	984000	1330000	0
Q5SX40	Myosin-1	Myh1	R.IEELEEEIEAE.R	1122	1132		0	0	0	0	0	0	0	0	0	162000	1750000	2030000	2540000	3020000
Q5SX40	Myosin-1	Myh1	K.MEGDLNEMEI.Q	1625	1634		3980000	1480000	2500000	2610000	1310000	2980000	1770000	0	6070000	5210000	5170000	4510000	4690000	4300000
Q5SX40	Myosin-1	Myh1	A.MMAEELKKEQDTSAHLER.M	1771	1788		4980000	2410000	0	0	0	0	0	8640000	0	0	0	0	0	0
Q5SX40	Myosin-1	Myh1	K.DTQLHLDDAL.R	1659	1668		0	0	0	0	0	0	0	0	0	0	0	2920000	3360000	0
Q5SX40	Myosin-1	Myh1	R.LQDAEEHV.E	1404	1411		0	0	0	0	0	0	0	0	0	0	0	1560000	1900000	2810000
Q5SX40	Myosin-1	Myh1	E.EAEERADIAESQV.N	1912	1924		1700000	0	1430000	0	0	0	0	2840000	0	281000	0	0	0	0
Q5SX40	Myosin-1	Myh1	V.FGEAAPYL.R	10	17		0	0	0	0	0	0	0	0	668000	655000	1020000	1190000	0	2650000
Q5SX40	Myosin-1	Myh1	R.RDLEEATLQHEATA.A	1183	1196		0	6650000	4130000	255000	2090000	0	0	10700000	0	0	0	0	0	1750000
Q5SX40	Myosin-1	Myh1	I.SERLEEAGGATSAQIEMNKKR.E	1154	1174		89600000	60500000	49900000	30100000	3550000	0	0	23300000	0	0	0	0	0	0
Q5SX40	Myosin-1	Myh1	Q.ARIEELEEEIEAERASR.A	1120	1136		0	894000	0	2170000	0	0	0	1470000	0	0	0	0	0	0
Q5SX40	Myosin-1	Myh1	R.SLSTELFKIK.N	1483	1492		30100000	21400000	10900000	8800000	6890000	3980000	1980000	11700000	561000	0	0	0	0	0
Q5SX40	Myosin-1	Myh1	D.SVAELGEQI.D	1206	1214		0	0	0	0	0	0	0	0	0	0	0	2660000	0	3190000
Q5SX40	Myosin-1	Myh1	D.DLEGSLEQEKKI.R	1040	1051		0	0	0	0	1970000	1580000	1370000	798000	4550000	4900000	1370000	866000	532000	0
Q5SX40	Myosin-1	Myh1	K.HADSVAELGEQIDNLQRVKQKLEKEK.S	1203	1228		2250000	0	0	0	0	0	0	0	0	0	0	0	0	0
Q5SX40	Myosin-1	Myh1	K.KALQEAHQQTLDDLQAEEDKV.N	1004	1024		0	521000	0	1050000	0	3450000	632000	0	2230000	565000	1950000	2460000	791000	638000
Q5SX40	Myosin-1	Myh1	K.YDKIEDMA.M	85	92		0	0	0	0	0	0	0	0	0	1240000	2030000	2180000	0	0
Q5SX40	Myosin-1	Myh1	R.RANLLQAEI.E	1684	1692		0	669000	968000	1080000	1370000	1320000	0	0	0	0	0	0	0	0
Q5SX40	Myosin-1	Myh1	K.IAEQELLDASER.V	1708	1719		0	3220000	1670000	0	0	0	0	11600000	0	4460000	0	0	0	0
Q5SX40	Myosin-1	Myh1	K.YETDAIQRTEELEEAKKK.L	1382	1399		53000000	36400000	22600000	3120000	4750000	778000	0	21100000	8790000	5500000	0	0	0	0
Q5SX40	Myosin-1	Myh1	K.KIKELQARIEELEEEIEAERASRAK.A	1114	1138		3050000	0	0	0	0	0	0	0	0	0	0	0	0	0
Q5SX40	Myosin-1	Myh1	L.STELFKIK.N	1485	1492		648000	1140000	0	0	0	0	0	722000	0	0	0	0	0	0
Q5SX40	Myosin-1	Myh1	R.QEAPPHIFSI.S	149	158		0	0	0	0	0	449000	0	1730000	3060000	1180000	0	668000	0	0
Q5SX40	Myosin-1	Myh1	E.DLMIDVER.T	1434	1441		0	0	0	0	0	0	0	0	0	407000	0	949000	1970000	1640000
Q5SX40	Myosin-1	Myh1	K.NLQQEISDLTEQI.A	1511	1523		1430000	0	0	0	0	0	0	0	0	0	0	0	0	0
Q5SX40	Myosin-1	Myh1	R.EAEFQKMRR.D	1175	1183		57900000	19800000	9100000	0	0	4830000	5870000	0	0	0	0	0	0	0
Q5SX40	Myosin-1	Myh1	A.ELGEQIDNLQRV.K	1209	1220		0	272000	1120000	0	0	0	0	0	0	3180000	0	0	0	0
Q5SX40	Myosin-1	Myh1	R.KIAEQELLDASER.V	1707	1719		8180000	3390000	5700000	850000	0	0	3250000	0	863000	5200000	0	1380000	0	1360000
Q5SX40	Myosin-1	Myh1	A.HQQTLDDLQAEEDKV.N	1010	1024		0	0	675000	0	0	0	0	0	0	0	0	2460000	3770000	4860000
Q5SX40	Myosin-1	Myh1	D.AAMMAEELKKEQDTSAHLER.M	1769	1788		5620000	0	0	0	0	0	0	0	0	0	0	0	0	0
Q5SX40	Myosin-1	Myh1	R.ADIAESQVNKL.R	1917	1927		0	0	0	0	0	0	0	0	0	474000	0	0	0	1380000
Q5SX40	Myosin-1	Myh1	K.NLTEEMAGLDETIAKLTKEK.K	984	1003		1160000	0	0	0	0	0	0	0	0	0	0	0	0	0
Q5SX40	Myosin-1	Myh1	R.ANLLQAEIEELRATLEQTERSR.K	1685	1706		1560000	0	0	0	0	0	0	0	0	0	0	0	0	0
Q5SX40	Myosin-1	Myh1	R.GKQAFTQQIEELKRQLEEEIK.A	1311	1331		2970000	0	0	0	525000	3410000	0	0	0	0	0	0	0	1420000
Q5SX40	Myosin-1	Myh1	E.APPHIFSI.S	151	158		0	0	858000	984000	0	1240000	1210000	0	0	0	0	0	0	0
Q5SX40	Myosin-1	Myh1	E.LGEQIDNLQR.V	1210	1219		0	0	2070000	2840000	5510000	9540000	10400000	0	0	0	0	0	0	0
Q5SX40	Myosin-1	Myh1	Q.QIEELKR.Q	1318	1324		1300000	2880000	0	0	0	0	0	0	0	0	0	0	0	0
Q5SX40	Myosin-1	Myh1	R.HDC(+57.02)DLL.R	1345	1350		0	0	0	0	0	0	0	0	0	0	0	0	1350000	2490000
Q5SX40	Myosin-1	Myh1	G.ILKDTQL.H	1656	1662		0	0	0	0	222000	1680000	1920000	0	0	0	0	0	0	0
Q5SX40	Myosin-1	Myh1	K.IQHELEEAEERADIA.E	1906	1920		0	0	0	0	0	0	0	2690000	0	0	0	0	0	0
Q5SX40	Myosin-1	Myh1	R.NFDKILA.E	1455	1461		5680000	10100000	10800000	12700000	12900000	13400000	11700000	14500000	17300000	16600000	12200000	7070000	16400000	8030000
Q5SX40	Myosin-1	Myh1	C.SELKKDIDDLELT.L	955	967		9700000	15300000	13700000	16100000	11900000	12900000	11800000	12300000	8170000	8270000	6080000	4800000	5550000	3660000
Q5SX40	Myosin-1	Myh1	K.QAFTQQIEELKRQLEEEIKAK.S	1313	1333		3540000	0	0	0	0	0	0	0	0	0	0	0	0	0
Q5SX40	Myosin-1	Myh1	R.IEELEEEIEA.E	1122	1131		0	663000	0	1430000	3000000	4240000	4620000	0	785000	716000	2310000	1030000	5840000	6180000
Q5SX40	Myosin-1	Myh1	L.DDLQAEEDKVNTLTK.A	1015	1029		0	1290000	0	0	635000	0	672000	1410000	1280000	274000	0	804000	0	0
Q5SX40	Myosin-1	Myh1	R.NFDKILAEWKQKYEETHA.E	1455	1472		0	0	0	0	0	0	0	1530000	0	0	0	0	0	0
Q5SX40	Myosin-1	Myh1	D.ALRGQEDLKEQLA.M	1667	1679		0	0	1290000	1530000	0	0	0	0	0	0	0	0	0	0
Q5SX40	Myosin-1	Myh1	E.ERADIAESQVNKLR.V	1915	1928		0	1320000	2080000	0	0	0	0	0	0	0	0	0	0	0
Q5SX40	Myosin-1	Myh1	K.ELQARIEELEEEIEAERASRAKAEK.Q	1117	1141		29500000	5480000	0	0	0	0	0	3370000	0	0	0	0	0	0
Q5SX40	Myosin-1	Myh1	R.KLEDEC(+57.02)SELK.K	949	958		0	0	0	8100000	0	0	0	10600000	6920000	0	2270000	5730000	14500000	70100000
Q5SX40	Myosin-1	Myh1	R.SDLSREL.E	1144	1150		0	339000	802000	0	681000	0	1240000	0	0	0	0	0	0	0
Q5SX40	Myosin-1	Myh1	R.LDEAEQLALKGGKK.Q	1804	1817		13700000	35000000	32900000	29800000	34200000	33300000	29100000	18200000	25400000	33100000	15300000	9740000	4960000	1320000
Q5SX40	Myosin-1	Myh1	A.RIEELEEEIEAERASRAKAEKQR.S	1121	1143		0	0	0	0	0	0	0	0	0	0	0	0	0	0
Q5SX40	Myosin-1	Myh1	R.RANLLQAEIEELRA.T	1684	1697		0	1350000	0	678000	0	0	0	690000	0	0	0	0	0	0
Q5SX40	Myosin-1	Myh1	K.NLTEEM(+15.99)AGLDETIAKLTK.E	984	1001		0	0	0	0	0	0	0	0	0	0	0	0	0	0
Q5SX40	Myosin-1	Myh1	K.ALQEAHQQTLDDLQAEEDKVNTL.T	1005	1027		0	352000	0	0	0	0	0	2510000	0	0	0	0	0	0
Q5SX40	Myosin-1	Myh1	A.RIEELEEEIEAERASR.A	1121	1136		92600000	140000000	123000000	98900000	62200000	34600000	11100000	111000000	47900000	18800000	7170000	3640000	0	2980000
Q5SX40	Myosin-1	Myh1	D.DLEGSLEQEK.K	1040	1049		4740000	7090000	9790000	12300000	11300000	16400000	19700000	7890000	14400000	20100000	22300000	27700000	33800000	35800000
Q5SX40	Myosin-1	Myh1	R.SLSTELFKIKN.A	1483	1493		2980000	0	0	0	0	0	0	0	0	0	0	0	0	0
Q5SX40	Myosin-1	Myh1	A.DAEERC(+57.02)DQLIKTK.I	907	919	Carbamidomethylation	0	2860000	2220000	1130000	4600000	7860000	5120000	0	0	0	0	0	0	0
Q5SX40	Myosin-1	Myh1	R.IEELEEEIE.A	1122	1130		0	0	0	0	1080000	0	1570000	0	0	0	0	0	0	0
Q5SX40	Myosin-1	Myh1	R.LQNEVEDLMIDVERTNAA.C	1428	1445		1620000	0	0	0	0	0	0	0	0	0	0	0	0	0
Q5SX40	Myosin-1	Myh1	R.ANLLQAEIEELRATLEQTER.S	1685	1704		483000	0	0	0	0	0	0	0	0	0	0	0	0	0
Q5SX40	Myosin-1	Myh1	K.HADSVAELGEQIDNLQRVKQKLEK.E	1203	1226		2570000	0	0	0	0	0	0	0	0	0	0	0	0	0
Q5SX40	Myosin-1	Myh1	R.SLSTELFKI.K	1483	1491		0	0	0	0	0	0	0	995000	344000	0	579000	0	0	0
Q5SX40	Myosin-1	Myh1	K.HADSVAELGEQIDNLQRVK.Q	1203	1221		342000000	210000000	191000000	110000000	59200000	29300000	9650000	113000000	18000000	8920000	0	0	0	0
Q5SX40	Myosin-1	Myh1	Q.NEVEDLMIDVERT.N	1430	1442		0	0	0	0	1370000	1080000	0	0	0	0	0	0	0	0
Q5SX40	Myosin-1	Myh1	N.LLQAEIEELRA.T	1687	1697		0	0	0	978000	0	0	0	961000	0	0	0	0	0	0
Q5SX40	Myosin-1	Myh1	I.TDAAMMAEELKKEQDTSAHLER.M	1767	1788		0	0	0	0	0	0	0	0	0	0	0	0	0	0
Q5SX40	Myosin-1	Myh1	I.LAEWKQKYEETHAELEA.S	1460	1476		9820000	3100000	12600000	5570000	0	8190000	7450000	0	8760000	0	0	8740000	6140000	2600000
Q5SX40	Myosin-1	Myh1	T.HLHEPAVL.Y	96	103		0	0	0	0	0	0	0	0	0	0	0	0	0	0
Q5SX40	Myosin-1	Myh1	K.KHADSVAELGEQIDNLQR.V	1202	1219		2540000	3680000	3460000	2310000	0	0	0	7700000	0	0	0	0	0	0
Q5SX40	Myosin-1	Myh1	K.AITDAAMM(+15.99)AEELKKEQDTSAHLER.M	1765	1788	Oxidation (M)	2210000	0	0	0	0	0	0	0	0	0	0	0	0	0
Q5SX40	Myosin-1	Myh1	V.FGEAAPYLRKSEKER.I	10	24		20300000	12700000	9980000	6650000	0	4840000	0	12200000	0	0	0	0	0	0
Q5SX40	Myosin-1	Myh1	A.NLLQAEIEELR.A	1686	1696		0	0	0	0	0	0	0	0	0	0	1410000	766000	0	0
Q5SX40	Myosin-1	Myh1	K.LEQQVDDLEGSLEQEK.K	1034	1049		591000	834000	2520000	4080000	3620000	6010000	11800000	0	3500000	8420000	9050000	14500000	21400000	20100000
Q5SX40	Myosin-1	Myh1	R.ELEEISERLEEA.G	1149	1160		0	0	0	0	0	0	0	2050000	0	0	0	0	0	0
Q5SX40	Myosin-1	Myh1	V.AELGEQIDNLQRVKQK.L	1208	1223		921000	0	0	0	0	0	0	0	0	0	0	0	0	0
Q5SX40	Myosin-1	Myh1	D.DLELTLAK.V	963	970		1010000	0	0	0	0	0	0	0	0	0	0	0	0	0
Q5SX40	Myosin-1	Myh1	L.EEAEERADIAESQVNKLR.V	1911	1928		0	0	1920000	0	0	0	0	0	0	0	0	0	0	0
Q5SX40	Myosin-1	Myh1	A.RIEELEEEIEAERASRA.K	1121	1137		0	1860000	0	0	0	0	0	0	0	0	0	0	0	0
Q5SX40	Myosin-1	Myh1	H.LHEPAVLYNLK.E	97	107		357000	823000	464000	777000	0	0	0	0	0	0	0	0	0	0
Q5SX40	Myosin-1	Myh1	A.EFQKMR.R	1177	1182		0	0	0	0	0	0	0	0	0	0	0	0	0	0
Q5SX40	Myosin-1	Myh1	A.ITDAAMMAEELKKEQDTSAHLER.M	1766	1788		712000	0	0	0	0	0	0	0	0	0	0	0	0	0
Q5SX40	Myosin-1	Myh1	K.ELQARIEELEEEIEAERA.S	1117	1134		0	0	0	0	0	0	0	0	0	0	0	0	0	0
Q5SX40	Myosin-1	Myh1	D.DLEGSLEQEKK.I	1040	1050		8490000	9670000	14800000	16100000	17100000	21200000	21400000	18300000	24300000	27700000	25000000	28100000	29000000	18200000
Q5SX40	Myosin-1	Myh1	V.TERAEDEEEINAELTAKKR.K	930	948		7390000	4370000	0	0	0	0	1150000	2830000	0	0	0	0	0	0
Q5SX40	Myosin-1	Myh1	D.DLQAEEDKVNTL.T	1016	1027		2040000	0	0	0	0	0	0	0	0	1530000	0	3610000	0	1960000
Q5SX40	Myosin-1	Myh1	A.RIEELEEEIEAE.R	1121	1132		0	0	0	0	0	700000	984000	0	0	6720000	0	1680000	3140000	3230000
Q5SX40	Myosin-1	Myh1	K.YDKIEDMAM.M	85	93		0	0	0	0	0	0	0	0	0	0	0	0	0	1380000
Q5SX40	Myosin-1	Myh1	K.NLTEEMAGLDETIAKLT.K	984	1000		3220000	59900	70500	0	0	0	0	0	0	0	0	0	0	0
Q5SX40	Myosin-1	Myh1	M.AVFGEAAPYLR.K	8	18		0	0	0	0	0	0	0	582000	0	0	0	0	0	0
Q5SX40	Myosin-1	Myh1	D.C(+57.02)DLLREQYE.E	1347	1355	Carbamidomethylation	0	0	0	442000	0	0	749000	0	0	0	0	0	0	0
Q5SX40	Myosin-1	Myh1	K.ELQARIEELEEEIEAER.A	1117	1133		0	0	0	0	0	0	0	0	0	0	0	0	0	0
Q5SX40	Myosin-1	Myh1	A.VLYNLKERY.A	102	110		0	0	0	0	0	0	0	1020000	0	0	0	0	0	0
Q5SX40	Myosin-1	Myh1	T.LDDLQAEEDKVNT.L	1014	1026		0	0	0	1760000	3550000	1880000	0	0	0	0	0	0	3510000	0
Q5SX40	Myosin-1	Myh1	Q.HELEEAEERADIAESQVNKLR.V	1908	1928		0	0	0	0	0	0	0	0	0	0	0	0	0	0
Q5SX40	Myosin-1	Myh1	K.SEMKMEIDDLASN.M	1229	1241		0	0	0	0	0	0	0	807000	0	0	0	0	0	0
Q5SX40	Myosin-1	Myh1	D.LELTLAKVEKEK.H	964	975		0	0	0	0	0	0	0	0	0	0	0	0	0	0
Q5SX40	Myosin-1	Myh1	R.GKQAFTQQIEELKRQL.E	1311	1326		2620000	0	0	0	0	0	0	0	0	0	0	0	0	0
Q5SX40	Myosin-1	Myh1	R.HDC(+57.02)DLLREQY.E	1345	1354	Carbamidomethylation	393000	2060000	3930000	4690000	4430000	3300000	5020000	0	1970000	2010000	1620000	1200000	0	0
Q5SX40	Myosin-1	Myh1	R.LQNEVEDLMIDVERT.N	1428	1442		23500000	34700000	22700000	32900000	29000000	24300000	15500000	31200000	32300000	26300000	34400000	20000000	19900000	14200000
Q5SX40	Myosin-1	Myh1	E.MKMEIDDLA.S	1231	1239		0	0	0	0	591000	0	0	0	0	0	0	0	0	0
Q5SX40	Myosin-1	Myh1	E.ELEEEIEAERA.S	1124	1134		0	0	0	0	0	0	558000	0	0	0	0	0	0	0
Q5SX40	Myosin-1	Myh1	D.DLQAEEDKVNTLTKAK.I	1016	1031		5490000	3210000	2470000	0	0	0	0	0	0	0	0	0	0	0
P60710	Actin cytoplasmic 1	Actb	G.FAGDDAPR.A	21	28		238000000	467000000	682000000	824000000	935000000	1040000000	1250000000	175000000	201000000	303000000	305000000	414000000	334000000	469000000
P60710	Actin cytoplasmic 1	Actb	A.GFAGDDAPR.A	20	28		406000000	475000000	523000000	483000000	623000000	592000000	612000000	560000000	571000000	504000000	559000000	572000000	597000000	649000000
P60710	Actin cytoplasmic 1	Actb	E.APLNPKA.N	108	114		1260000000	1370000000	449000000	518000000	1030000000	672000000	465000000	0	0	5950000	0	4930000	0	0
P60710	Actin cytoplasmic 1	Actb	L.TEAPLNPK.A	106	113		112000000	149000000	161000000	160000000	176000000	187000000	202000000	202000000	231000000	323000000	272000000	185000000	297000000	343000000
P60710	Actin cytoplasmic 1	Actb	L.RVAPEEHPV.L	95	103		115000000	156000000	130000000	205000000	171000000	108000000	154000000	122000000	86500000	133000000	148000000	118000000	154000000	295000000
P60710	Actin cytoplasmic 1	Actb	R.DIKEKL.C	211	216		51100000	51900000	61400000	42900000	53500000	51500000	58100000	56400000	53800000	60100000	51000000	50400000	44200000	36100000
P60710	Actin cytoplasmic 1	Actb	R.AVFPSIVGR.P	29	37		35000000	46200000	47700000	44100000	45100000	37600000	34300000	48000000	82400000	85800000	73300000	59000000	40000000	32400000
P60710	Actin cytoplasmic 1	Actb	G.MGQKDSYV.G	47	54		0	48200000	68800000	42600000	7360000	96800000	59500000	27100000	65700000	62500000	47000000	83300000	57100000	72500000
P60710	Actin cytoplasmic 1	Actb	T.EAPLNPKA.N	107	114		48400000	47300000	50600000	46100000	47000000	52100000	50200000	58600000	49900000	51200000	49200000	55900000	44300000	50000000
P60710	Actin cytoplasmic 1	Actb	I.WHHTF.Y	86	90		5590000	13200000	15200000	17000000	23500000	23300000	23100000	41600000	58800000	72700000	72700000	33000000	34600000	54100000
P60710	Actin cytoplasmic 1	Actb	V.GMGQKDSYVGDEAQSKR.G	46	62		71800000	110000000	111000000	68300000	112000000	112000000	155000000	261000000	214000000	220000000	156000000	129000000	87100000	53700000
P60710	Actin cytoplasmic 1	Actb	R.VAPEEHPV.L	96	103		32200000	26400000	42000000	20400000	37800000	47500000	24900000	25400000	26500000	21400000	32700000	31500000	21200000	39500000
P60710	Actin cytoplasmic 1	Actb	W.ISKQEYDESGPSIV.H	357	370		21000000	24700000	23900000	46900000	28400000	49500000	52600000	48900000	60400000	64500000	67700000	41200000	36500000	26900000
P60710	Actin cytoplasmic 1	Actb	R.AVFPSIVGRPR.H	29	39		2090000000	2340000000	2140000000	1810000000	1800000000	1480000000	1170000000	2620000000	2060000000	1420000000	1060000000	714000000	509000000	241000000
P60710	Actin cytoplasmic 1	Actb	L.LTEAPLNPK.A	105	113		23300000	4600000	31200000	33100000	3010000	27700000	31300000	30800000	34100000	35000000	39500000	39600000	42400000	38500000
P60710	Actin cytoplasmic 1	Actb	T.EAPLNPKAN.R	107	115		82600000	79900000	76000000	56000000	80300000	68600000	60400000	99700000	111000000	58700000	41600000	14200000	15000000	18900000
P60710	Actin cytoplasmic 1	Actb	L.SGGTTMYPGIADR.M	300	312		21600000	13400000	18800000	21400000	16800000	23900000	18800000	36100000	37900000	38600000	41700000	33800000	40600000	33600000
P60710	Actin cytoplasmic 1	Actb	V.LLTEAPLNPK.A	104	113		0	30300000	32500000	33700000	0	29600000	30700000	34700000	47400000	48400000	55500000	0	53700000	49500000
P60710	Actin cytoplasmic 1	Actb	F.PSIVGRPR.H	32	39		346000000	280000000	450000000	376000000	266000000	258000000	171000000	365000000	277000000	255000000	180000000	137000000	104000000	65600000
P60710	Actin cytoplasmic 1	Actb	F.PSIVGRP.R	32	38		11700000	14200000	16200000	32800000	40800000	49800000	56800000	87400000	105000000	137000000	147000000	151000000	151000000	156000000
P60710	Actin cytoplasmic 1	Actb	G.DDAPRAVFPSIVGRPR.H	24	39		167000000	144000000	132000000	108000000	103000000	87800000	63000000	75500000	13200000	0	0	0	0	0
P60710	Actin cytoplasmic 1	Actb	A.VFPSIVGRPR.H	30	39		41400000	52400000	51400000	55100000	59200000	55500000	52700000	51800000	55400000	59600000	37600000	40900000	31400000	11600000
P60710	Actin cytoplasmic 1	Actb	R.AVFPSIVGRPRH.Q	29	40		63800000	56900000	46700000	27300000	30700000	26300000	19500000	14600000	0	0	0	0	0	0
P60710	Actin cytoplasmic 1	Actb	R.HQGVMVGMGQKDSYV.G	40	54		47800000	59800000	55600000	66200000	52000000	46900000	35000000	48200000	38800000	37600000	17300000	10200000	0	0
P60710	Actin cytoplasmic 1	Actb	Y.DESGPSIVHRK.C	363	373		339000000	213000000	98300000	92600000	56700000	31500000	0	8140000	0	0	0	0	0	0
P60710	Actin cytoplasmic 1	Actb	W.HHTFYNELR.V	87	95		52000000	51100000	26500000	17800000	35300000	8580000	5290000	19400000	17800000	19900000	22000000	42000000	17800000	24600000
P60710	Actin cytoplasmic 1	Actb	S.KQEYDESGPSIV.H	359	370		19900000	32000000	18000000	26500000	27200000	20100000	29200000	12500000	11600000	11500000	15800000	20700000	14400000	12500000
P60710	Actin cytoplasmic 1	Actb	A.GFAGDDAPRAVFPSIVGRPR.H	20	39		342000000	139000000	60100000	19100000	18300000	4330000	0	23000000	0	0	0	0	0	0
P60710	Actin cytoplasmic 1	Actb	G.VMVGMGQKDSYV.G	43	54		42000000	28200000	28500000	19200000	18000000	15100000	12000000	12900000	3440000	2810000	3030000	0	0	0
P60710	Actin cytoplasmic 1	Actb	L.TEAPLNPKANR.E	106	116		60600000	0	34400000	0	0	0	0	0	0	0	0	0	0	0
P60710	Actin cytoplasmic 1	Actb	D.ESGPSIVH.R	364	371		0	30300000	1570000	6670000	6740000	5200000	26700000	23100000	2790000	0	5470000	0	0	31800000
P60710	Actin cytoplasmic 1	Actb	K.IWHHTF.Y	85	90		7780000	14100000	7650000	11300000	10500000	0	8430000	20400000	17400000	18600000	14900000	17000000	17200000	0
P60710	Actin cytoplasmic 1	Actb	P.RAVFPSIVGRPR.H	28	39		8310000	7470000	5550000	3430000	3660000	0	2970000	48500000	0	0	9860000	0	3410000	0
P60710	Actin cytoplasmic 1	Actb	G.GTTMYPGIADR.M	302	312		6100000	6420000	15400000	4900000	5440000	4720000	14300000	11300000	12200000	9420000	10400000	10400000	11400000	10900000
P60710	Actin cytoplasmic 1	Actb	T.EAPLNPKANR.E	107	116		143000000	0	0	0	0	0	0	0	0	0	0	0	0	0
P60710	Actin cytoplasmic 1	Actb	T.EAPLNPK.A	107	113		5370000	5200000	6920000	0	3660000	8340000	0	13600000	12500000	11200000	21200000	7190000	15000000	20800000
P60710	Actin cytoplasmic 1	Actb	H.HTFYNELR.V	88	95		22100000	19600000	15400000	11100000	11400000	8200000	4370000	6200000	5980000	2400000	4930000	2800000	1380000	0
P60710	Actin cytoplasmic 1	Actb	P.SIVGRPR.H	33	39		11800000	12300000	10900000	8480000	9110000	7260000	5190000	12400000	10500000	6610000	5330000	3600000	2490000	994000
P60710	Actin cytoplasmic 1	Actb	L.TEAPLNPKA.N	106	114		11900000	9710000	6750000	0	5580000	9240000	11400000	7840000	8690000	9610000	2120000	8100000	8450000	7280000
P60710	Actin cytoplasmic 1	Actb	R.VAPEEHPVL.L	96	104		6880000	9730000	10400000	0	0	11500000	11900000	6760000	6990000	8430000	9870000	10500000	10300000	10600000
P60710	Actin cytoplasmic 1	Actb	S.GPSIVHR.K	366	372		0	38000000	17600000	45800000	22000000	0	0	0	0	0	0	0	0	0
P60710	Actin cytoplasmic 1	Actb	A.PLNPKAN.R	109	115		3460000	11900000	8720000	3980000	4400000	11800000	0	6570000	0	15200000	10100000	8360000	13500000	16300000
P60710	Actin cytoplasmic 1	Actb	V.MVGMGQKDSYV.G	44	54		7390000	813000	3100000	2550000	3940000	4350000	4710000	8560000	7900000	12100000	10800000	12800000	15800000	19400000
P60710	Actin cytoplasmic 1	Actb	R.HQGVM(+15.99)VGM(+15.99)GQKDSYVGDEAQSKR.G	40	62	Oxidation (M)	8890000	7340000	15800000	0	1890000	0	0	50500000	0	0	0	0	0	0
P60710	Actin cytoplasmic 1	Actb	W.HHTFYNE.L	87	93		0	15800000	8590000	13700000	26400000	25400000	24200000	0	0	0	0	0	0	0
P60710	Actin cytoplasmic 1	Actb	W.ISKQEYDESGPS.I	357	368		8270000	10500000	25900000	20900000	9590000	8410000	6790000	19400000	12800000	18500000	17900000	0	12700000	12200000
P60710	Actin cytoplasmic 1	Actb	K.AGFAGDDAPRA.V	19	29		10200000	14700000	11800000	10100000	7610000	7410000	6480000	2600000	2950000	4860000	3230000	3590000	0	0
P60710	Actin cytoplasmic 1	Actb	R.HQGVMVGMGQKD.S	40	51		55800000	34700000	30400000	29200000	14900000	6020000	1340000	19900000	6420000	7660000	17500000	0	0	0
P60710	Actin cytoplasmic 1	Actb	Q.GVMVGMGQKDSYV.G	42	54		1600000	5240000	5630000	9600000	9960000	13900000	17400000	0	0	4090000	4000000	3670000	6150000	4710000
P60710	Actin cytoplasmic 1	Actb	I.WHHTFYNELR.V	86	95		2920000	1940000	0	0	0	0	0	18800000	18100000	18700000	14500000	9330000	3170000	0
P60710	Actin cytoplasmic 1	Actb	R.FRC(+57.02)PEA.L	255	260	Carbamidomethylation	4540000	4630000	4960000	7470000	4610000	4690000	0	5600000	5160000	6360000	5120000	5010000	5050000	6080000
P60710	Actin cytoplasmic 1	Actb	E.KSYELPDGQVIT.I	238	249		3240000	4710000	0	0	0	0	0	3670000	3020000	7630000	3870000	12100000	9620000	8750000
P60710	Actin cytoplasmic 1	Actb	K.EITALAPSTMK.I	316	326		2520000	2790000	2860000	3010000	2880000	3850000	2560000	8840000	0	12200000	6970000	9220000	3930000	2780000
P60710	Actin cytoplasmic 1	Actb	S.GPSIVHRK.C	366	373		49000000	36900000	58300000	19400000	9830000	4770000	0	5660000	7410000	10700000	6430000	8340000	0	0
P60710	Actin cytoplasmic 1	Actb	Y.DESGPSIVH.R	363	371		1400000	3800000	14400000	3190000	8290000	5560000	4540000	8790000	10500000	7290000	9080000	7590000	10400000	9170000
P60710	Actin cytoplasmic 1	Actb	T.VLSGGTTMYPGIADR.M	298	312		3900000	3040000	3580000	1390000	2000000	2600000	1870000	4720000	5210000	5950000	4770000	5080000	5790000	6230000
P60710	Actin cytoplasmic 1	Actb	E.LRVAPEEHP.V	94	102		0	0	0	0	0	0	0	8010000	10100000	7390000	9390000	9450000	9120000	8300000
P60710	Actin cytoplasmic 1	Actb	R.FRC(+57.02)PEAL.F	255	261	Carbamidomethylation	3770000	2570000	1980000	0	1920000	1400000	11200000	11100000	11800000	3370000	2160000	2280000	1420000	924000
P60710	Actin cytoplasmic 1	Actb	D.SYVGDEAQSKR.G	52	62		95700000	9510000	4740000	0	4300000	0	0	3630000	3000000	0	3390000	0	0	0
P60710	Actin cytoplasmic 1	Actb	L.TEAPLNPKAN.R	106	115		22800000	3730000	5210000	5860000	11100000	5850000	5590000	0	0	0	3660000	0	0	0
P60710	Actin cytoplasmic 1	Actb	W.HHTFYNEL.R	87	94		0	724000	0	1690000	2300000	958000	1280000	0	0	4210000	7830000	9900000	11800000	15000000
P60710	Actin cytoplasmic 1	Actb	K.AGFAGDDAPRAVFPSIVG.R	19	36		21000000	10700000	8010000	2590000	1400000	695000	0	6200000	0	0	0	0	0	0
P60710	Actin cytoplasmic 1	Actb	R.HQGVMVGMGQKDSYVGDEAQSK.R	40	61		36200000	33600000	33300000	25500000	18900000	5400000	6870000	32200000	6640000	6500000	0	0	0	0
P60710	Actin cytoplasmic 1	Actb	K.SYELPDGQVIT.I	239	249		14700000	17500000	9420000	13700000	16700000	43400000	20500000	22800000	21900000	29000000	29200000	25800000	26900000	39100000
P60710	Actin cytoplasmic 1	Actb	A.VFPSIVGRP.R	30	38		7330000	20800000	34600000	51600000	72600000	95600000	118000000	0	52500000	102000000	150000000	156000000	188000000	212000000
P60710	Actin cytoplasmic 1	Actb	L.SGGTTM(+15.99)YPGIADR.M	300	312	Oxidation (M)	0	0	1070000	2050000	12000000	2420000	0	2840000	11100000	2370000	1860000	5140000	4410000	3240000
P60710	Actin cytoplasmic 1	Actb	R.HQGVMVGMGQKDSYVGDEAQSKR.G	40	62		416000000	272000000	249000000	185000000	107000000	35100000	41900000	195000000	20700000	47900000	7070000	5490000	0	0
P60710	Actin cytoplasmic 1	Actb	G.DDAPRAVFPSIV.G	24	35		0	1030000	1760000	2640000	10400000	9360000	9880000	6450000	3870000	0	0	0	0	0
P60710	Actin cytoplasmic 1	Actb	V.GMGQKDSYVG.D	46	55		0	538000	760000	1240000	2040000	2760000	3560000	3490000	3210000	6140000	5600000	5590000	5250000	5620000
P60710	Actin cytoplasmic 1	Actb	S.KQEYDESGPSIVHRK.C	359	373		27200000	9080000	0	0	0	0	0	0	0	0	0	0	0	0
P60710	Actin cytoplasmic 1	Actb	R.DIKEKLC(+57.02)YV.A	211	219	Carbamidomethylation	4140000	4150000	3660000	2240000	8660000	5010000	2290000	3470000	1890000	1810000	1130000	634000	0	0
P60710	Actin cytoplasmic 1	Actb	K.IWHHTFY.N	85	91		0	0	0	0	0	0	0	3890000	4930000	7490000	15900000	7780000	5520000	0
P60710	Actin cytoplasmic 1	Actb	K.IWHHTFYNEL.R	85	94		9030000	14000000	8830000	7090000	0	6760000	0	28400000	7900000	34300000	31500000	23300000	15300000	5340000
P60710	Actin cytoplasmic 1	Actb	M.VGMGQKDSYV.G	45	54		0	6850000	0	4230000	0	4170000	9930000	0	0	0	5160000	3590000	0	10400000
P60710	Actin cytoplasmic 1	Actb	C.GIHETTF.N	273	279		7460000	9660000	9180000	0	10800000	4490000	0	0	0	0	0	0	0	0
P60710	Actin cytoplasmic 1	Actb	R.HQGVM(+15.99)VGMGQKDSYV.G	40	54	Oxidation (M)	5010000	14100000	12200000	16600000	14300000	12700000	10300000	2800000	2470000	5740000	3910000	2130000	6320000	1300000
P60710	Actin cytoplasmic 1	Actb	V.LLTEAPLNPKAN.R	104	115		17700000	19800000	17100000	18100000	16800000	17200000	13100000	15700000	12300000	5480000	5510000	6520000	5170000	14200000
P60710	Actin cytoplasmic 1	Actb	V.GMGQKDSYV.G	46	54		0	0	11400000	17900000	26400000	26400000	48700000	24300000	45500000	51600000	57200000	70900000	87100000	90100000
P60710	Actin cytoplasmic 1	Actb	V.APEEHPVL.L	97	104		0	2520000	2540000	0	4080000	21700000	1540000	0	6290000	0	0	0	0	0
P60710	Actin cytoplasmic 1	Actb	E.KIWHHTF.Y	84	90		3400000	4050000	0	1580000	0	0	0	0	8470000	8060000	7080000	0	0	3940000
P60710	Actin cytoplasmic 1	Actb	R.AVFPSIVGRPRHQGV.M	29	43		0	0	1340000	1410000	0	0	2030000	8490000	9880000	10900000	9760000	10700000	10300000	11900000
P60710	Actin cytoplasmic 1	Actb	K.AGFAGDDAPR.A	19	28		862000000	1030000000	975000000	895000000	829000000	689000000	564000000	1410000000	1410000000	1510000000	1380000000	1300000000	1130000000	1060000000
P60710	Actin cytoplasmic 1	Actb	T.TMYPGIADR.M	304	312		3510000	2470000	0	3850000	8390000	5100000	3680000	0	0	0	0	0	0	0
P60710	Actin cytoplasmic 1	Actb	K.AGFAGDDAPRAVFPSIVGRPR.H	19	39		1100000000	470000000	256000000	120000000	63800000	25900000	0	165000000	5830000	0	0	0	0	0
P60710	Actin cytoplasmic 1	Actb	P.RAVFPSIV.G	28	35		0	0	0	0	0	383000	682000	2320000	0	0	13000000	681000	17200000	0
P60710	Actin cytoplasmic 1	Actb	F.AGDDAPRAVFPSIVGRPR.H	22	39		40200000	16900000	5210000	1740000	0	0	0	3780000	0	0	0	0	0	0
P60710	Actin cytoplasmic 1	Actb	G.FAGDDAPRA.V	21	29		22700000	16300000	16000000	9340000	17700000	15900000	22800000	0	0	3600000	5310000	0	0	0
P60710	Actin cytoplasmic 1	Actb	R.HQGVMVGM(+15.99)GQKDSYVGDEAQSKR.G	40	62	Oxidation (M)	26100000	12700000	12700000	14200000	0	0	0	81700000	26500000	0	0	0	0	0
P60710	Actin cytoplasmic 1	Actb	R.DIKEKLC(+57.02).Y	211	217	Carbamidomethylation	3640000	0	15900000	0	2790000	0	2760000	0	0	0	0	0	0	0
P60710	Actin cytoplasmic 1	Actb	D.DAPRAVFPSIVGRPR.H	25	39		30500000	19300000	14500000	6460000	8210000	5210000	1120000	0	0	0	0	0	0	0
P60710	Actin cytoplasmic 1	Actb	E.SGPSIVHRK.C	365	373		22100000	0	0	0	0	0	0	0	0	0	0	0	0	0
P60710	Actin cytoplasmic 1	Actb	P.RAVFPSIVG.R	28	36		0	0	0	0	0	0	0	0	3650000	4500000	4720000	3160000	4360000	3920000
P60710	Actin cytoplasmic 1	Actb	A.GFAGDDAPRAVFPS.I	20	33		0	0	0	3620000	5650000	9470000	7890000	0	0	0	0	0	0	0
P60710	Actin cytoplasmic 1	Actb	A.GDDAPRAVFPSIVGRPR.H	23	39		54900000	27100000	9900000	3030000	0	3630000	0	0	0	0	0	0	0	0
P60710	Actin cytoplasmic 1	Actb	V.FPSIVGRPR.H	31	39		363000000	377000000	333000000	285000000	301000000	273000000	197000000	421000000	322000000	214000000	168000000	109000000	76400000	37600000
P60710	Actin cytoplasmic 1	Actb	K.DSYVGDEAQSKR.G	51	62		245000000	249000000	402000000	399000000	304000000	286000000	313000000	609000000	686000000	866000000	1050000000	1000000000	747000000	765000000
P60710	Actin cytoplasmic 1	Actb	V.TNWDDMEKIWH.H	77	87		7050000	6160000	4800000	4250000	3260000	3340000	2800000	0	0	0	0	0	0	0
P60710	Actin cytoplasmic 1	Actb	R.HQGVMVGM(+15.99)GQKD.S	40	51	Oxidation (M)	42300000	0	0	0	0	0	0	0	0	0	0	0	0	0
P60710	Actin cytoplasmic 1	Actb	A.VFPSIVGR.P	30	37		0	0	0	0	1460000	1400000	4290000	0	0	2850000	3110000	3460000	4870000	2550000
P60710	Actin cytoplasmic 1	Actb	V.TNWDDMEKIW.H	77	86		2820000	3650000	2860000	2900000	3110000	2870000	2890000	475000	670000	775000	0	0	0	0
P60710	Actin cytoplasmic 1	Actb	A.PEEHPV.L	98	103		0	1620000	2160000	0	0	0	2010000	0	2170000	2490000	3510000	2770000	4870000	0
P60710	Actin cytoplasmic 1	Actb	V.FPSIVGRP.R	31	38		7480000	16400000	26900000	30100000	38700000	43500000	44300000	32900000	49900000	62000000	64900000	61400000	60700000	47100000
P60710	Actin cytoplasmic 1	Actb	V.GMGQKDSYVGDEAQSK.R	46	61		0	772000	8100000	19000000	5470000	15000000	19300000	22700000	32500000	12300000	15200000	18700000	15500000	0
P60710	Actin cytoplasmic 1	Actb	K.IWHHTFYNELR.V	85	95		14000000	8700000	6400000	5560000	6110000	4810000	7730000	55600000	53800000	30400000	24200000	12500000	6670000	11500000
P60710	Actin cytoplasmic 1	Actb	I.WHHTFY.N	86	91		0	0	0	0	0	0	0	0	2780000	3610000	0	5190000	5060000	3860000
P60710	Actin cytoplasmic 1	Actb	R.HQGVMVGM(+15.99)GQKDSYV.G	40	54	Oxidation (M)	0	1440000	2790000	2750000	1880000	1490000	0	2140000	4590000	0	3770000	1810000	861000	573000
P60710	Actin cytoplasmic 1	Actb	R.HQGVMVGMGQKDSYVGDEAQ.S	40	59		16600000	9360000	7930000	2420000	1550000	0	0	1600000	0	0	0	0	0	0
P60710	Actin cytoplasmic 1	Actb	K.SYELPDGQVI.T	239	248		12700000	19700000	21800000	24100000	28100000	28200000	30700000	28900000	27700000	29500000	23500000	40200000	41200000	42200000
P60710	Actin cytoplasmic 1	Actb	M.GQKDSYVGDE.A	48	57		0	0	0	0	0	0	0	0	2410000	8380000	3820000	0	1400000	0
P60710	Actin cytoplasmic 1	Actb	Q.GVMVGMGQKD.S	42	51		0	3660000	2320000	3030000	3120000	0	7050000	0	0	0	0	0	0	0
P60710	Actin cytoplasmic 1	Actb	E.LRVAPEEHPVL.L	94	104		0	0	2750000	0	1030000	0	0	4050000	3720000	6650000	2570000	3270000	0	2500000
P60710	Actin cytoplasmic 1	Actb	E.KSYELPDGQVI.T	238	248		0	0	0	0	0	0	0	1450000	200000	3380000	0	1760000	2140000	1200000
P60710	Actin cytoplasmic 1	Actb	L.SGGTTMYPGIADRM.Q	300	313		0	0	596000	0	0	817000	993000	2030000	2690000	2190000	2440000	2570000	2120000	1000000
P60710	Actin cytoplasmic 1	Actb	R.HQGVM(+15.99)VGMGQKD.S	40	51	Oxidation (M)	13600000	9860000	7340000	5860000	3840000	3140000	5720000	5360000	4500000	3120000	4540000	1380000	692000	986000
P60710	Actin cytoplasmic 1	Actb	V.LLTEAPLNPKA.N	104	114		0	0	0	1680000	0	0	0	0	0	0	0	11700000	0	1650000
P60710	Actin cytoplasmic 1	Actb	V.GMGQKDSYVGDEAQ.S	46	59		269000	1120000	1030000	2010000	1070000	1170000	1070000	3510000	1190000	0	0	0	0	0
P60710	Actin cytoplasmic 1	Actb	G.VMVGMGQKDSYVGDEAQSKR.G	43	62		12300000	37200000	36100000	37100000	35900000	0	37100000	34900000	37600000	0	55100000	63500000	68600000	79800000
P60710	Actin cytoplasmic 1	Actb	T.EAPLNPKANRE.K	107	117		28000000	0	0	0	0	0	0	0	0	0	0	0	0	0
P60710	Actin cytoplasmic 1	Actb	K.AGFAGDDAPRAVFPSIV.G	19	35		30900000	25900000	15300000	13300000	8240000	4800000	1710000	21200000	0	0	0	0	0	0
P60710	Actin cytoplasmic 1	Actb	R.HQGVM(+15.99)VGMGQKDSYVGDEAQSKR.G	40	62	Oxidation (M)	28000000	8460000	24300000	18500000	8130000	7120000	0	5200000	7300000	1430000	0	0	0	0
P60710	Actin cytoplasmic 1	Actb	P.RAVFPSIVGRP.R	28	38		0	930000	1880000	0	0	1810000	1350000	27400000	24800000	11000000	18500000	17900000	0	6240000
P60710	Actin cytoplasmic 1	Actb	D.SYVGDEAQSKRG.I	52	63		2360000	6880000	0	0	0	0	0	0	0	0	0	0	0	0
P60710	Actin cytoplasmic 1	Actb	V.FPSIVGRPRH.Q	31	40		2190000	2390000	1230000	1810000	0	806000	0	0	0	0	0	0	0	0
P60710	Actin cytoplasmic 1	Actb	S.GGTTMYPGIADR.M	301	312		0	0	0	0	0	1430000	1330000	0	764000	1420000	0	2870000	0	3670000
P60710	Actin cytoplasmic 1	Actb	F.PSIVGRPRH.Q	32	40		0	0	3000000	2700000	2650000	1360000	1620000	0	0	0	0	0	0	0
P60710	Actin cytoplasmic 1	Actb	R.FRC(+57.02)PEALFQPSF.L	255	266	Carbamidomethylation	682000	0	0	0	0	0	0	2560000	1690000	1660000	1270000	1060000	822000	0
P60710	Actin cytoplasmic 1	Actb	V.MVGMGQKD.S	44	51		0	0	3960000	0	0	3100000	2330000	4580000	4190000	9160000	9620000	13500000	13000000	0
P60710	Actin cytoplasmic 1	Actb	R.DIKEKLC(+57.02)Y.V	211	218	Carbamidomethylation	17300000	6890000	5180000	0	0	0	3320000	11600000	8620000	3430000	2960000	0	0	0
P60710	Actin cytoplasmic 1	Actb	I.WHHTFYN.E	86	92		0	0	0	0	0	0	0	0	1370000	1830000	0	2270000	2480000	1540000
P60710	Actin cytoplasmic 1	Actb	S.KQEYDESGPSIVH.R	359	371		3430000	7300000	5270000	2150000	0	2500000	6150000	10400000	3680000	3560000	2170000	0	0	0
P60710	Actin cytoplasmic 1	Actb	D.DAPRAVFPS.I	25	33		4490000	3970000	0	1860000	0	0	0	0	0	0	0	0	0	0
P60710	Actin cytoplasmic 1	Actb	I.SKQEYDESGPSIV.H	358	370		0	2040000	0	0	2280000	2750000	0	0	0	0	0	849000	2340000	0
P60710	Actin cytoplasmic 1	Actb	G.FAGDDAPRAVFPS.I	21	33		4860000	0	0	0	0	0	0	0	0	0	0	0	0	0
P60710	Actin cytoplasmic 1	Actb	R.HQGVMVGMGQKDSYVGDEAQSKRG.I	40	63		25100000	6060000	5390000	4340000	0	0	0	0	0	0	0	0	0	0
P60710	Actin cytoplasmic 1	Actb	D.SYVGDEAQSK.R	52	61		26800000	17800000	25000000	24500000	52400000	42500000	42900000	36400000	34500000	45800000	51400000	34400000	31100000	0
P60710	Actin cytoplasmic 1	Actb	A.GFAGDDAPRAVFPSIV.G	20	35		9650000	10600000	2840000	2030000	1980000	867000	0	3260000	0	0	0	0	0	0
P60710	Actin cytoplasmic 1	Actb	W.ISKQEYDESGPSIVH.R	357	371		0	0	0	0	0	0	0	0	0	0	0	0	3980000	0
P60710	Actin cytoplasmic 1	Actb	G.FAGDDAPRAVFPSIVGRPR.H	21	39		11500000	4690000	0	453000	0	0	0	503000	1690000	0	0	0	0	0
P60710	Actin cytoplasmic 1	Actb	M.VGMGQKDSYVGDEAQSKR.G	45	62		2680000	6830000	3530000	1460000	0	0	2120000	0	0	0	0	0	0	0
P60710	Actin cytoplasmic 1	Actb	Q.GVMVGMGQKDS.Y	42	52		0	0	0	2210000	0	3560000	5880000	0	0	0	0	0	0	0
P60710	Actin cytoplasmic 1	Actb	G.DDAPRAVFPSIVG.R	24	36		1710000	0	1200000	0	2400000	2070000	0	0	0	0	0	0	0	0
P60710	Actin cytoplasmic 1	Actb	R.HQGVMVGMGQKDSYVGD.E	40	56		5960000	432000	0	0	0	0	0	0	0	0	0	0	0	0
P60710	Actin cytoplasmic 1	Actb	G.MGQKDSYVGDEAQSKR.G	47	62		65900000	66100000	92300000	52900000	57800000	70700000	52000000	27000000	30300000	0	15700000	28700000	0	0
P60710	Actin cytoplasmic 1	Actb	V.FPSIVGR.P	31	37		716000	627000	0	855000	818000	870000	0	0	1810000	0	0	0	780000	0
P60710	Actin cytoplasmic 1	Actb	A.GFAGDDAPRAVFP.S	20	32		4520000	2450000	0	0	0	0	0	0	0	0	0	0	0	0
P60710	Actin cytoplasmic 1	Actb	E.YDESGPSIVHRK.C	362	373		0	0	0	0	0	0	0	0	0	0	0	0	0	0
P60710	Actin cytoplasmic 1	Actb	Q.GVMVGMGQKDSYVGDEAQSKR.G	42	62		2070000	16700000	12200000	13700000	2690000	5790000	5180000	12200000	0	0	0	0	0	0
P60710	Actin cytoplasmic 1	Actb	D.APRAVFPSIVGRPR.H	26	39		0	1520000	1420000	2070000	1130000	0	0	690000	0	0	0	0	0	0
P60710	Actin cytoplasmic 1	Actb	A.GFAGDDAPRAVFPSIVG.R	20	36		9090000	2480000	0	623000	0	0	0	651000	0	0	0	0	0	0
P60710	Actin cytoplasmic 1	Actb	R.AVFPSIVGRP.R	29	38		424000000	751000000	1040000000	1250000000	1380000000	1400000000	1330000000	1620000000	2360000000	2860000000	2910000000	2830000000	2610000000	1910000000
P60710	Actin cytoplasmic 1	Actb	H.HTFYNEL.R	88	94		0	0	881000	0	886000	637000	781000	0	0	0	1380000	0	550000	1150000
P60710	Actin cytoplasmic 1	Actb	Y.DESGPSIVHR.K	363	372		2550000	0	0	0	0	0	0	0	0	0	0	0	0	0
P60710	Actin cytoplasmic 1	Actb	L.EKSYELPDGQVI.T	237	248		0	0	0	0	0	0	0	1630000	0	364000	0	0	0	0
P60710	Actin cytoplasmic 1	Actb	K.AGFAGDDAPRAVFPSIVGR.P	19	37		12400000	4100000	1740000	0	0	0	0	1440000	0	0	0	0	0	0
P60710	Actin cytoplasmic 1	Actb	R.HQGVMVGMGQKDS.Y	40	52		10200000	8780000	11000000	6190000	8270000	7220000	9900000	0	2900000	0	0	0	0	0
P60710	Actin cytoplasmic 1	Actb	W.DDMEKIWHHTFYNELR.V	80	95		0	0	0	0	0	0	0	1950000	1320000	0	0	0	0	0
P60710	Actin cytoplasmic 1	Actb	K.AGFAGDDAPRAVFPS.I	19	33		44200000	30500000	21900000	16400000	15300000	22200000	6260000	3430000	0	0	0	0	0	0
P60710	Actin cytoplasmic 1	Actb	I.WHHTFYNEL.R	86	94		0	0	0	0	0	0	0	3660000	4820000	7410000	8790000	9570000	6050000	3030000
P60710	Actin cytoplasmic 1	Actb	E.IVRDIKEKL.C	208	216		2040000	0	0	0	0	0	0	0	0	0	0	0	0	0
P60710	Actin cytoplasmic 1	Actb	V.LSGGTTMYPGIADR.M	299	312		0	0	329000	0	0	0	358000	0	1040000	0	2070000	1050000	0	0
P60710	Actin cytoplasmic 1	Actb	N.WDDMEKIWH.H	79	87		11000000	11600000	10300000	9200000	8510000	7450000	6250000	0	0	2670000	0	0	0	0
P60710	Actin cytoplasmic 1	Actb	G.PSIVHRK.C	367	373		0	4670000	0	0	2900000	0	0	0	0	0	0	0	0	0
P60710	Actin cytoplasmic 1	Actb	W.DDMEKIWH.H	80	87		1230000	0	0	1280000	869000	0	1020000	0	0	0	0	0	0	0
P60710	Actin cytoplasmic 1	Actb	D.DMEKIWHHT.F	81	89		2050000	0	0	0	0	0	0	0	0	0	0	0	0	0
P60710	Actin cytoplasmic 1	Actb	R.HQGVMVGMGQKDSYVG.D	40	55		16800000	4110000	4500000	4370000	4250000	3400000	0	3160000	1960000	860000	1030000	0	0	0
P60710	Actin cytoplasmic 1	Actb	K.AGFAGDDAPRAVFPSIVGRPRH.Q	19	40		9600000	0	0	0	0	0	0	0	0	0	0	0	0	0
P60710	Actin cytoplasmic 1	Actb	V.MVGMGQKDSYVG.D	44	55		0	0	0	0	0	0	0	0	0	0	0	1510000	2030000	0
P60710	Actin cytoplasmic 1	Actb	K.IWHHTFYN.E	85	92		4610000	10600000	4840000	3440000	18200000	0	3470000	4560000	5520000	5050000	3110000	6830000	0	2330000
P60710	Actin cytoplasmic 1	Actb	K.AGFAGDDAPRAVF.P	19	31		4360000	3140000	0	0	0	0	0	1960000	0	0	0	0	0	0
P60710	Actin cytoplasmic 1	Actb	C.KAGFAGDDAPR.A	18	28		105000000	178000000	182000000	180000000	154000000	152000000	170000000	143000000	126000000	163000000	121000000	163000000	195000000	174000000
P60710	Actin cytoplasmic 1	Actb	V.MVGMGQKDSYVGDEAQSKR.G	44	62		0	0	0	0	0	0	0	6030000	2440000	0	0	0	0	0
P60710	Actin cytoplasmic 1	Actb	K.DSYVGDEAQSK.R	51	61		23100000	27800000	24600000	11800000	26000000	37200000	30600000	21700000	25700000	38200000	53400000	54600000	57400000	51300000
P60710	Actin cytoplasmic 1	Actb	K.EITALAPSTMKIK.I	316	328		0	0	0	0	0	0	0	1450000	0	0	0	0	0	0
P60710	Actin cytoplasmic 1	Actb	K.IWHHTFYNE.L	85	93		0	3250000	678000	0	0	0	0	1940000	690000	0	0	0	0	0
P60710	Actin cytoplasmic 1	Actb	T.NWDDMEKIWH.H	78	87		4010000	7380000	4070000	1980000	2650000	777000	1110000	1650000	647000	0	0	0	0	0
P60710	Actin cytoplasmic 1	Actb	R.HQGVMVGMGQKDSYVGDEA.Q	40	58		4630000	1010000	0	0	0	0	0	0	0	0	0	0	0	0
P60710	Actin cytoplasmic 1	Actb	K.AGFAGDDAPRAVFP.S	19	32		3170000	0	0	2690000	2990000	4940000	0	6160000	0	3000000	1600000	2170000	1680000	3540000
P60710	Actin cytoplasmic 1	Actb	W.ISKQEYDESGPSIVHRK.C	357	373		2400000	0	0	0	0	0	0	0	0	0	0	0	0	0
P60710	Actin cytoplasmic 1	Actb	A.GDDAPRAVFPS.I	23	33		3020000	0	5000000	0	3460000	693000	0	0	0	0	1170000	1440000	1430000	4030000
P60710	Actin cytoplasmic 1	Actb	L.EKSYELPDGQVIT.I	237	249		0	0	943000	0	1260000	1710000	1230000	4980000	15400000	4790000	4680000	5110000	540000	1220000
P60710	Actin cytoplasmic 1	Actb	K.AGFAGDDAPRAVFPSIVGRP.R	19	38		5200000	1850000	0	0	0	0	0	0	0	0	0	0	0	0
P60710	Actin cytoplasmic 1	Actb	T.NWDDMEKIWHHTFYNELR.V	78	95		0	0	0	0	0	0	0	0	0	0	0	0	0	0
P60710	Actin cytoplasmic 1	Actb	N.WDDMEKIW.H	79	86		8020000	10500000	11300000	10200000	13900000	12200000	9550000	0	0	0	0	0	0	0
P60710	Actin cytoplasmic 1	Actb	L.RVAPEEHPVL.L	95	104		13600000	13300000	12200000	12000000	14200000	13000000	10900000	16700000	15700000	12300000	15900000	11300000	10500000	12100000
P60710	Actin cytoplasmic 1	Actb	A.PRAVFPSIVGRPR.H	27	39		0	0	1030000	0	0	0	0	0	0	0	0	0	0	0
P60710	Actin cytoplasmic 1	Actb	W.DDMEKIW.H	80	86		0	0	0	0	0	851000	0	0	0	0	0	0	0	0
P60710	Actin cytoplasmic 1	Actb	A.SSSSLEKSYELPDGQVI.T	232	248		714000	0	0	0	0	0	0	0	0	0	0	0	0	0
P60710	Actin cytoplasmic 1	Actb	V.TNWDDMEKIWHHT.F	77	89		0	0	0	0	0	0	0	0	0	0	0	0	0	0
P60710	Actin cytoplasmic 1	Actb	T.NWDDMEKIW.H	78	86		15100000	19300000	19100000	16000000	11500000	12300000	5840000	0	305000	0	0	0	0	0
P60710	Actin cytoplasmic 1	Actb	A.LAPSTMK.I	320	326		0	0	0	0	0	0	0	196000	0	0	0	0	0	0
P60710	Actin cytoplasmic 1	Actb	K.IIAPPERK.Y	329	336		582000000	642000000	645000000	580000000	571000000	539000000	577000000	734000000	714000000	833000000	736000000	876000000	721000000	748000000
P60710	Actin cytoplasmic 1	Actb	R.HQGVMVG.M	40	46		139000000	98100000	106000000	86800000	78400000	76000000	90600000	79500000	51500000	66300000	0	10700000	15700000	0
P60710	Actin cytoplasmic 1	Actb	V.MVGMGQK.D	44	50		8270000	24400000	33700000	307000000	26100000	59100000	47500000	0	0	0	0	0	117000000	0
P60710	Actin cytoplasmic 1	Actb	R.HQGVMVGMGQK.D	40	50		177000000	202000000	218000000	202000000	149000000	125000000	127000000	158000000	124000000	113000000	63500000	69100000	25100000	191000
P60710	Actin cytoplasmic 1	Actb	M.DSGDGVTHTVP.I	154	164		59200000	55200000	56400000	58200000	57100000	57400000	58000000	56900000	47000000	39000000	35000000	52700000	39100000	43900000
P60710	Actin cytoplasmic 1	Actb	K.IIAPPERKY.S	329	337		141000000	78800000	43300000	23900000	27300000	22500000	14900000	142000000	1880000	0	227000	0	0	0
P60710	Actin cytoplasmic 1	Actb	R.FRC(+57.02)PE.A	255	259		0	29800000	21300000	16300000	29400000	27900000	32700000	23000000	21900000	32500000	33300000	36700000	0	14900000
P60710	Actin cytoplasmic 1	Actb	I.IAPPERK.Y	330	336		148000000	171000000	171000000	147000000	148000000	152000000	154000000	193000000	187000000	211000000	195000000	193000000	183000000	193000000
P60710	Actin cytoplasmic 1	Actb	K.IIAPPER.K	329	335		553000000	623000000	624000000	603000000	601000000	585000000	579000000	961000000	924000000	880000000	897000000	891000000	886000000	848000000
P60710	Actin cytoplasmic 1	Actb	T.NWDDMEK.I	78	84		6030000	11600000	12400000	15300000	17200000	19800000	19600000	18700000	30800000	37300000	38700000	41000000	41500000	43400000
P60710	Actin cytoplasmic 1	Actb	R.DLTDYLM(+15.99)KI.L	184	192		15500000	19200000	19100000	17600000	15500000	16700000	12200000	17200000	18300000	20600000	17400000	14500000	10400000	5390000
P60710	Actin cytoplasmic 1	Actb	K.IKIIAPPER.K	327	335		11100000	12400000	7260000	1370000	7550000	8640000	9150000	15700000	14900000	15400000	359000	10400000	10500000	9390000
P60710	Actin cytoplasmic 1	Actb	R.HQGVM(+15.99)VGMGQK.D	40	50		39200000	37500000	43300000	41000000	41300000	31600000	41300000	69500000	77200000	106000000	101000000	37200000	29800000	24900000
P60710	Actin cytoplasmic 1	Actb	L.RLDLAGR.D	177	183		4110000	4800000	29400000	0	4410000	0	4140000	16000000	7890000	19700000	15000000	0	0	2110000
P60710	Actin cytoplasmic 1	Actb	R.GILTLKYPIE.H	63	72		14900000	15200000	14200000	11000000	10600000	9040000	5900000	14200000	10300000	6910000	3890000	2160000	0	0
P60710	Actin cytoplasmic 1	Actb	I.KIIAPPERK.Y	328	336		127000000	0	0	0	0	0	0	0	0	0	0	0	0	0
P60710	Actin cytoplasmic 1	Actb	N.WDDMEK.I	79	84		13200000	18400000	7820000	18600000	19600000	13700000	20300000	0	4610000	6550000	5690000	8740000	7930000	10300000
P60710	Actin cytoplasmic 1	Actb	M.DSGDGVTHTVPI.Y	154	165		4800000	4240000	7150000	4620000	4170000	8610000	6130000	7750000	5720000	14400000	5020000	8220000	4540000	2480000
P60710	Actin cytoplasmic 1	Actb	I.YEGYALPHAI.L	166	175		0	5440000	4230000	6490000	3750000	2230000	0	12900000	2200000	12300000	8570000	8510000	5660000	1350000
P60710	Actin cytoplasmic 1	Actb	T.LKYPIE.H	67	72		0	1340000	1560000	1680000	2130000	1910000	2110000	11700000	10900000	9780000	9630000	7810000	8340000	8290000
P60710	Actin cytoplasmic 1	Actb	I.IAPPERKY.S	330	337		0	14600000	9040000	4990000	0	4550000	0	0	0	6350000	0	0	0	0
P60710	Actin cytoplasmic 1	Actb	T.FYNELR.V	90	95		7730000	5890000	11500000	8090000	7310000	6070000	4340000	4090000	3910000	3950000	2350000	4310000	4010000	1710000
P60710	Actin cytoplasmic 1	Actb	Y.PGIADRM.Q	307	313		18000000	18300000	14700000	14600000	15900000	15300000	15800000	22600000	19000000	14500000	13100000	13600000	11300000	14800000
P60710	Actin cytoplasmic 1	Actb	I.KIIAPPER.K	328	335		0	0	0	0	0	0	0	49200000	58300000	54500000	54300000	54900000	60300000	67600000
P60710	Actin cytoplasmic 1	Actb	K.IKIIAPPERK.Y	327	336		6640000	5540000	5650000	7340000	5750000	4700000	4120000	8020000	6690000	0	6170000	3150000	0	2220000
P60710	Actin cytoplasmic 1	Actb	Y.VGDEAQSKR.G	54	62		0	0	0	0	0	0	8130000	3760000	7860000	7830000	10500000	11400000	1710000	9930000
P60710	Actin cytoplasmic 1	Actb	L.RLDLAGRD.L	177	184		17600000	13300000	0	9420000	0	12000000	5860000	24300000	16600000	18600000	21900000	21600000	18000000	24200000
P60710	Actin cytoplasmic 1	Actb	G.YALPHAIL.R	169	176		0	1320000	824000	795000	1570000	759000	824000	10300000	9250000	7700000	5960000	5580000	4840000	2720000
P60710	Actin cytoplasmic 1	Actb	L.DLAGRDLTDYL.M	179	189		4650000	2970000	5860000	4000000	0	4590000	0	9980000	6980000	2100000	516000	0	6510000	0
P60710	Actin cytoplasmic 1	Actb	H.TFYNELR.V	89	95		3120000	4200000	4070000	4540000	0	4180000	2260000	2260000	1330000	4050000	4180000	11300000	0	0
P60710	Actin cytoplasmic 1	Actb	E.GYALPHA.I	168	174		2230000	0	2270000	0	2420000	2310000	1620000	5660000	0	5220000	5400000	4920000	4010000	3100000
P60710	Actin cytoplasmic 1	Actb	V.GDEAQSKR.G	55	62		0	7250000	0	2750000	0	0	0	4910000	5360000	5350000	9220000	2400000	6460000	0
P60710	Actin cytoplasmic 1	Actb	Q.GVMVGMGQK.D	42	50		13600000	0	7130000	6490000	9590000	0	0	0	0	0	1250000	5370000	1280000	0
P60710	Actin cytoplasmic 1	Actb	R.GILTLKY.P	63	69		6320000	5080000	3980000	2920000	0	0	331000	6490000	3100000	2140000	1060000	0	0	0
P60710	Actin cytoplasmic 1	Actb	G.RDLTDYLMK.I	183	191		4390000	5120000	2880000	0	8630000	0	11400000	0	0	0	0	6920000	0	0
P60710	Actin cytoplasmic 1	Actb	R.DLTDYLMK.I	184	191		742000	1630000	1250000	1140000	1450000	1600000	1950000	2690000	2680000	3990000	2990000	5160000	5910000	5410000
P60710	Actin cytoplasmic 1	Actb	D.GVTHTVPIY.E	158	166		0	0	0	0	0	2010000	1920000	0	0	11500000	2490000	7960000	0	9000000
P60710	Actin cytoplasmic 1	Actb	V.ITIGNER.F	248	254		722000	0	0	0	0	0	0	6070000	4910000	4300000	2460000	5330000	3630000	0
P60710	Actin cytoplasmic 1	Actb	N.WDDMEKI.W	79	85		1500000	2030000	2570000	1080000	4160000	3700000	4330000	0	1120000	1890000	1240000	1060000	2090000	1940000
P60710	Actin cytoplasmic 1	Actb	I.YEGYALPHAIL.R	166	176		1940000	561000	1060000	1720000	0	0	0	1000000	6180000	2630000	3010000	3720000	5140000	0
P60710	Actin cytoplasmic 1	Actb	S.YELPDGQVI.T	240	248		6010000	9980000	8610000	12100000	12400000	11300000	8860000	9700000	7860000	9260000	9870000	10600000	12900000	15100000
P60710	Actin cytoplasmic 1	Actb	S.YELPDGQVIT.I	240	249		9550000	7730000	13100000	20100000	52900000	16500000	21600000	24800000	18600000	11800000	21300000	16100000	14700000	21200000
P60710	Actin cytoplasmic 1	Actb	D.LAGRDLTDYL.M	180	189		0	0	0	1290000	0	0	0	4760000	4050000	2420000	3890000	2890000	4030000	1960000
P60710	Actin cytoplasmic 1	Actb	M.YPGIADR.M	306	312		0	10200000	6280000	0	0	0	0	0	0	0	0	0	0	0
P60710	Actin cytoplasmic 1	Actb	R.HQGVMVGMGQ.K	40	49		3460000	6600000	8540000	0	0	0	0	0	0	0	0	0	0	0
P60710	Actin cytoplasmic 1	Actb	V.TNWDDMEK.I	77	84		0	0	3380000	3230000	0	1750000	3080000	2390000	0	2520000	3180000	4830000	2400000	4880000
P60710	Actin cytoplasmic 1	Actb	L.DLAGRDLT.D	179	186		0	0	0	0	0	1320000	3410000	1720000	2080000	0	0	8820000	4150000	0
P60710	Actin cytoplasmic 1	Actb	T.MYPGIADR.M	305	312		0	1900000	2170000	0	2430000	0	0	0	3180000	0	2380000	3180000	3780000	2630000
P60710	Actin cytoplasmic 1	Actb	K.IIAPPERKYS.V	329	338		10900000	2480000	0	0	0	0	0	0	0	0	0	0	0	0
P60710	Actin cytoplasmic 1	Actb	I.APPERKY.S	331	337		0	0	0	0	965000	0	0	2380000	0	0	0	0	0	0
P60710	Actin cytoplasmic 1	Actb	G.YALPHAI.L	169	175		0	0	0	0	0	0	0	2000000	2350000	1590000	1990000	2380000	3010000	2780000
P60710	Actin cytoplasmic 1	Actb	R.GILTLKYPI.E	63	71		1290000	1850000	1370000	1450000	1430000	693000	760000	1990000	1450000	0	491000	0	0	0
P60710	Actin cytoplasmic 1	Actb	R.HQGVM(+15.99)VGMG.Q	40	48		0	0	0	0	0	0	0	0	0	0	0	0	0	0
P60710	Actin cytoplasmic 1	Actb	R.HQGVMVGMG.Q	40	48		4550000	0	4950000	0	0	0	0	0	0	0	0	0	0	0
P60710	Actin cytoplasmic 1	Actb	A.GRDLTDYL.M	182	189		2170000	1130000	3500000	4640000	3130000	2800000	3150000	0	0	1520000	0	655000	687000	2350000
P60710	Actin cytoplasmic 1	Actb	M.KIKIIAPPER.K	326	335		0	0	852000	1120000	0	0	0	1500000	1740000	1790000	1480000	0	1860000	1330000
P60710	Actin cytoplasmic 1	Actb	K.RGILTLKY.P	62	69		1460000	0	0	0	0	0	0	1860000	0	0	0	0	0	0
P60710	Actin cytoplasmic 1	Actb	V.TNWDDMEKI.W	77	85		0	0	0	0	0	2290000	0	1600000	4940000	3830000	4590000	4490000	1600000	1740000
P60710	Actin cytoplasmic 1	Actb	R.GILTLKYP.I	63	70		1980000	1550000	1520000	1310000	0	0	0	0	0	0	0	0	0	0
P60710	Actin cytoplasmic 1	Actb	I.KIIAPPERKY.S	328	337		3420000	1460000	0	0	0	0	0	0	0	0	0	0	0	0
P60710	Actin cytoplasmic 1	Actb	L.AGRDLTDYL.M	181	189		0	0	0	0	0	0	0	1800000	1460000	970000	0	0	0	1070000
P60710	Actin cytoplasmic 1	Actb	R.HQGVM(+15.99)VGM(+15.99)GQK.D	40	50		0	0	0	0	0	0	0	0	0	6420000	0	0	0	0
P60710	Actin cytoplasmic 1	Actb	T.NWDDMEKI.W	78	85		0	692000	0	1460000	2440000	684000	6310000	18400000	16400000	11600000	11000000	32900000	38400000	33800000
P60710	Actin cytoplasmic 1	Actb	L.RLDLAGRDLTDYL.M	177	189		938000	784000	0	0	0	0	0	1550000	0	0	0	0	0	0
P60710	Actin cytoplasmic 1	Actb	K.IKIIAPPERKY.S	327	337		2170000	0	0	0	0	0	0	0	0	0	0	0	0	0
P60710	Actin cytoplasmic 1	Actb	E.GYALPHAIL.R	168	176		0	0	0	0	0	0	0	0	1120000	945000	604000	0	0	0
P60710	Actin cytoplasmic 1	Actb	W.DDMEKI.W	80	85		0	0	0	0	0	0	1170000	1240000	2530000	2250000	2780000	2770000	3980000	5140000
P60710	Actin cytoplasmic 1	Actb	S.LSTFQQM.W	349	355		0	0	0	0	0	0	0	0	764000	0	0	520000	410000	0
P60710	Actin cytoplasmic 1	Actb	G.RDLTDYL.M	183	189		2450000	3740000	2940000	3000000	2750000	3420000	3950000	2480000	2150000	0	1910000	2550000	1810000	1320000
P60710	Actin cytoplasmic 1	Actb	R.HQGVMVGM.G	40	47		0	0	0	0	0	0	0	0	0	0	0	0	0	0
P60710	Actin cytoplasmic 1	Actb	D.LAGRDLTDYLMK.I	180	191		0	0	0	0	0	0	0	0	516000	0	0	0	0	0
P13541	Myosin-3	Myh3	R.DLEEATLQHEAT.V	1178	1189		249000000	228000000	232000000	185000000	114000000	66000000	28900000	107000000	16500000	15400000	10400000	2550000	0	973000
P13541	Myosin-3	Myh3	A.RIEELEEEIEAERA.T	1115	1128		15900000	55200000	52600000	46500000	98800000	89600000	71200000	89800000	140000000	99000000	107000000	100000000	78900000	60900000
P13541	Myosin-3	Myh3	K.NALAHALQS.S	1328	1336		17700000	29900000	32500000	32300000	41900000	55500000	40200000	23900000	30300000	31700000	25000000	15900000	10100000	2960000
P13541	Myosin-3	Myh3	N.ALAHALQSSR.H	1329	1338		52700000	36900000	39600000	28400000	33600000	23200000	12300000	196000000	302000000	25900000	295000000	3380000	237000000	0
P13541	Myosin-3	Myh3	E.EEIEAERA.T	1121	1128		0	7110000	0	17900000	23300000	45300000	39300000	0	18000000	29800000	21700000	52100000	23600000	54200000
P13541	Myosin-3	Myh3	N.ALAHALQS.S	1329	1336		18600000	5800000	6130000	19600000	8330000	10100000	12800000	10700000	13400000	14200000	31400000	13200000	22400000	22800000
P13541	Myosin-3	Myh3	L.EEEIEAERA.T	1120	1128		0	38200000	0	42700000	12300000	58600000	12400000	0	0	26300000	0	0	0	0
P13541	Myosin-3	Myh3	D.AEERC(+57.02)DQLIK.A	902	911	Carbamidomethylation	10500000	10100000	24300000	12400000	2590000	3150000	4620000	20300000	26400000	16700000	18900000	10200000	15900000	19100000
P13541	Myosin-3	Myh3	K.NALAHALQSS.R	1328	1337		333000	26600000	3010000	4490000	7070000	7710000	5220000	707000	9820000	27400000	957000	6850000	3580000	21400000
P13541	Myosin-3	Myh3	D.LEEATLQHEAT.V	1179	1189		23700000	13500000	14500000	11000000	12700000	4880000	2200000	9170000	0	0	0	0	0	0
P13541	Myosin-3	Myh3	K.NALAHALQ.S	1328	1335		1210000	9690000	9520000	10200000	10900000	13000000	13500000	0	0	26100000	0	0	0	0
P13541	Myosin-3	Myh3	A.RIEELEEEIEAERATRAK.T	1115	1132		14000000	17000000	7710000	0	19900000	18400000	0	0	0	0	0	0	0	11000000
P13541	Myosin-3	Myh3	D.DALRGQEDLKEQLA.I	1660	1673		10100000	7280000	9180000	9090000	12300000	14300000	18300000	4330000	8690000	5450000	6050000	5920000	4220000	2910000
P13541	Myosin-3	Myh3	L.STELFK.L	1479	1484		0	2080000	4480000	5400000	7610000	8680000	9130000	778000	0	0	885000	0	0	0
P13541	Myosin-3	Myh3	N.DKQQLDERLK.K	1073	1082		2870000	3940000	0	4890000	3180000	1810000	3640000	14000000	8110000	10400000	5950000	10500000	0	5730000
P13541	Myosin-3	Myh3	A.MNPPKF.D	80	85		4970000	5170000	5040000	5180000	4650000	4110000	0	8620000	7440000	6100000	0	0	4630000	3420000
P13541	Myosin-3	Myh3	A.DIAESQVNKLR.A	1912	1922		91600000	131000000	122000000	141000000	126000000	113000000	109000000	103000000	88700000	69800000	50200000	30300000	19000000	13500000
P13541	Myosin-3	Myh3	K.NALAHALQSSRHDC(+57.02)DLLR.E	1328	1345	Carbamidomethylation	9090000	9400000	6500000	11600000	5300000	21700000	3480000	0	0	0	0	0	0	0
P13541	Myosin-3	Myh3	E.EAEERADIAESQVNKLR.A	1906	1922		38400000	22000000	12800000	13700000	2870000	3170000	0	16500000	8430000	3670000	0	0	0	0
P13541	Myosin-3	Myh3	R.LQDLVDKLQ.V	1865	1873		2650000	5340000	6680000	6460000	9560000	10700000	10000000	2510000	0	17200000	6130000	4130000	19200000	6810000
P13541	Myosin-3	Myh3	I.EELEEEIEAERA.T	1117	1128		0	1590000	2990000	5320000	4460000	5630000	5110000	1630000	4970000	4270000	4610000	3970000	3810000	3150000
P13541	Myosin-3	Myh3	D.DLQAEEDKVN.S	1010	1019		10200000	13000000	10900000	14500000	13300000	15900000	15200000	7250000	9060000	7590000	9900000	8590000	11200000	14700000
P13541	Myosin-3	Myh3	R.IEELEEEIEAERA.T	1116	1128		49600000	127000000	155000000	194000000	194000000	176000000	136000000	173000000	286000000	305000000	292000000	268000000	242000000	178000000
P13541	Myosin-3	Myh3	A.EQIDNLQR.V	1206	1213		8320000	0	0	2150000	0	9430000	2040000	0	0	4100000	0	0	6120000	0
P13541	Myosin-3	Myh3	E.LEEEIEAERA.T	1119	1128		0	0	6120000	4030000	6740000	5320000	5720000	0	0	0	3580000	2580000	2580000	5780000
P13541	Myosin-3	Myh3	A.EERADIAESQVNKLR.A	1908	1922		19400000	23100000	25400000	22900000	16400000	11600000	11000000	13400000	8310000	2910000	0	0	0	0
P13541	Myosin-3	Myh3	A.LSKANSEVAQWR.T	1362	1373		0	2930000	0	2640000	2430000	0	2200000	4660000	4540000	4020000	3230000	2480000	3530000	3050000
P13541	Myosin-3	Myh3	L.DLENDKQQLDERLK.K	1069	1082		0	0	0	12600000	1980000	5950000	11300000	0	0	1410000	6490000	8230000	1070000	4650000
P13541	Myosin-3	Myh3	K.NALAHALQSSR.H	1328	1338		74300000	87500000	101000000	71200000	66100000	43500000	30900000	55100000	36300000	37200000	20600000	12400000	2260000	7450000
P13541	Myosin-3	Myh3	T.LDDLQAEEDKVN.S	1008	1019		3510000	3780000	5030000	8750000	4210000	6000000	2170000	8360000	9980000	7490000	7390000	7380000	8880000	5930000
P13541	Myosin-3	Myh3	D.LMVDVER.A	1429	1435		728000	0	0	0	0	2610000	1590000	0	0	3950000	3610000	3580000	4230000	0
P13541	Myosin-3	Myh3	D.IAESQVNKLR.A	1913	1922		21000000	21400000	14900000	5990000	8500000	12300000	4210000	16800000	6410000	2430000	756000	0	0	0
P13541	Myosin-3	Myh3	K.NALAHAL.Q	1328	1334		0	0	0	2950000	0	4380000	0	0	4410000	3280000	4320000	2460000	0	0
P13541	Myosin-3	Myh3	R.ADIAESQVNKLR.A	1911	1922		19700000	27500000	35800000	29300000	28100000	15900000	12000000	12600000	15700000	15700000	7210000	4690000	726000	1570000
P13541	Myosin-3	Myh3	I.AESQVNKLR.A	1914	1922		3010000	3130000	3920000	1010000	6560000	4000000	3990000	0	2030000	2490000	1380000	745000	536000	1570000
P13541	Myosin-3	Myh3	K.DTQLHLDDALRGQEDLKEQLA.I	1653	1673		2200000	3930000	2090000	0	6080000	2070000	9380000	10800000	8220000	11500000	4520000	6110000	5410000	7030000
P13541	Myosin-3	Myh3	L.DLENDKQQLDER.L	1069	1080		0	1040000	0	0	0	0	1330000	6030000	3080000	2940000	3050000	3650000	13100000	26300000
P13541	Myosin-3	Myh3	R.ALSKANSEVAQWR.T	1361	1373		6980000	2600000	0	0	0	2390000	0	3790000	0	0	2240000	0	0	0
P13541	Myosin-3	Myh3	R.SLSTELFK.L	1477	1484		81200000	97700000	92200000	84200000	109000000	92500000	85400000	95900000	113000000	113000000	112000000	106000000	94800000	112000000
P13541	Myosin-3	Myh3	R.GQEDLKEQLA.I	1664	1673		0	0	0	0	0	0	22400000	15900000	3940000	2350000	6090000	2740000	32900000	10600000
P13541	Myosin-3	Myh3	A.GLDETIAKLT.R	985	994		10500000	3860000	8960000	0	551000	3690000	0	10100000	0	841000	3370000	3320000	3980000	8380000
P13541	Myosin-3	Myh3	V.EDLMVDVER.A	1427	1435		5600000	4910000	4130000	4220000	5500000	4270000	4110000	4220000	7160000	5420000	8870000	6010000	6400000	11400000
P13541	Myosin-3	Myh3	K.ELQARIEELEEEIEAERATRAK.T	1111	1132		4940000	1220000	0	0	0	0	0	0	0	0	0	0	0	0
P13541	Myosin-3	Myh3	R.RDLEEATLQHEAT.V	1177	1189		58000000	49500000	58400000	44300000	25500000	23200000	8540000	22200000	8290000	12900000	3730000	0	3290000	3040000
P13541	Myosin-3	Myh3	E.AEERADIAESQVNKLR.A	1907	1922		4420000	2630000	9480000	2370000	3430000	1620000	0	0	0	0	0	0	0	0
P13541	Myosin-3	Myh3	K.NALAHALQSSRHD.C	1328	1340		0	0	0	0	0	0	0	0	0	0	0	0	0	0
P13541	Myosin-3	Myh3	D.ALRGQEDLKEQLA.I	1661	1673		0	0	1290000	1530000	0	0	0	0	0	0	0	0	0	0
P13541	Myosin-3	Myh3	E.ERADIAESQVNKLR.A	1909	1922		0	1320000	2080000	0	0	0	0	0	0	0	0	0	0	0
P13541	Myosin-3	Myh3	K.FDKIEDMA.M	85	92		0	0	0	0	0	0	0	0	0	354000	0	1750000	0	841000
P13541	Myosin-3	Myh3	L.EEAEERADIAESQVNKLR.A	1905	1922		0	0	1920000	0	0	0	0	0	0	0	0	0	0	0
P13541	Myosin-3	Myh3	K.ELQARIEELEEEIEAERA.T	1111	1128		0	0	0	0	0	0	0	0	0	0	0	0	0	0
P13541	Myosin-3	Myh3	Q.HELEEAEERADIAESQVNKLR.A	1902	1922		0	0	0	0	0	0	0	0	0	0	0	0	0	0
P13541	Myosin-3	Myh3	A.RIEELEEEIEAERATR.A	1115	1130		0	0	0	0	0	0	0	478000	0	0	0	0	0	0
P13541	Myosin-3	Myh3	R.DLEEATLQHEATV.A	1178	1190		0	0	0	0	0	0	0	0	0	0	0	0	0	0
[truncated: 2,504 more rows]
