# Supplementary material for: Identification of trypsin-degrading commensals in the large intestine
Source: Nature. 2022 Sep 7;609(7927):582–9. doi: 10.1038/s41586-022-05181-3 (PMC9477747; doi:10.1038/s41586-022-05181-3)
Supplement: Supplementary file 6 — Characteristics of the COVID-19 cohorts. [file 41586_2022_5181_MOESM6_ESM.xlsx]

## Sheet: Sheet1
Supplementary Table 4
Characteristics of the COVID-19 cohorts
					Total	00502 positive	00502 negative
Number of subjects					146	35	111
Age, years (mean±SD)					50.95±14.93	48.63±12.25	51.68±15.62
Sex, Female, n (%)					53 (36.3%)	9 (25.7%)	44 (39.6%)
Fever/Cough, n (%)					139 (95.2%)	34 (97.1%)	105 (94.6%)
Inhalation of oxygen, n (%)					41 (28.1%)	5 (14.3%)	36 (32.4%)
Intubation, n (%)					7 (4.8%)	0 (0%)	7 (6.3%)
Extracorporeal membrane oxygenation (ECMO), n (%)					0 (0%)	0 (0%)	0 (0%)
Comorbidities, n (%)
	Hypertension				16 (11.1%)	3 (8.6%)	13 (11.7%)
	Hyperlipidemia				15 (10.3%)	3 (8.6%)	12 (10.8%)
	Diabetes mellitus				12 (8.2%)	2 (5.7%)	10 (9.0%)
	Asthma				10 (6.8%)	3 (8.6%)	7 (6.3%)
	Hyperuricemia				8 (5.5%)	3 (8.6%)	5 (4.5%)
Antibiotics prescribed during hospitalization, n (%)
	Ceftriaxone				55 (37.7%)	12 (34.3%)	43 (38.7%)
	Azithromycin				52 (35.6%)	11 (31.4%)	41 (36.9%)
	Tazobactam / Piperacillin				8 (5.5%)	0 (0%)	8 (7.2%)
Treatments for COVID-19, n (%)
	Remdesivir				64 (43.8%)	15 (42.9%)	49 (44.1%)
	Dexamethasone				55 (37.7%)	10 (28.6%)	45 (40.5%)
	Favipiravir				33 (22.6%)	8 (22.9%)	25 (22.5%)
	Tocilizumab				18 (12.3%)	3 (8.6%)	15 (13.5%)
Diarrhoeal episodes, n (%)
	No diarrhoeal episode				79 (56%)	20 (60.6%)	59 (54.6%)
	At least one episode of diarrhoea				62 (44%)	13 (39.4%)	49 (45.4%)
		One or more episodes of diarrhoea of one-day duration			23 (16.3%)	6 (18.2%)	17 (15.7%)
		At least one episode of diarrhoea per day > 1 day duration			39 (27.7%)	7 (21.2%)	32 (29.6%)
			Less than three episodes of diarrhoea per day > 1 day duration		27 (19.1%)	7 (21.2%)	20 (18.5%)
			Three or more episodes of diarrhoea per day > 1 day duration		12 (8.5%)	0 (0%)	12 (11.1%)
				Three or more episodes of diarrhoea per day of 2 day duration	6 (4.3%)	0 (0%)	6 (5.6%)
				Three or more episodes of diarrhoea per day of 3 day duration	2 (1.4%)	0 (0%)	2 (1.9%)
				Three or more episodes of diarrhoea per day of 4 day duration	4 (2.8%)	0 (0%)	4 (3.7%)
