# Supplementary material for: Identification of trypsin-degrading commensals in the large intestine
Source: Nature. 2022 Sep 7;609(7927):582–9. doi: 10.1038/s41586-022-05181-3 (PMC9477747; doi:10.1038/s41586-022-05181-3)
Supplement: Supplementary file 7 — Primer information. [file 41586_2022_5181_MOESM7_ESM.xlsx]

## Sheet: Primers
Supplementary Table 4: Primer information
Primer name (for insertinal mutants)	Sequence (5' - 3')
PorU-cloning-Fw	GTGGATCCCCCGGGCTGCAGCATCCCTCCTCCATCTGT
PorU-cloning-Rv	CTGGAAGATAGGCAATTAGTTTGGGACGTAGGGGCAATC
PorU-mutant validation-Fw	TCCCGACCGACTGATCCTTTTTAACCC
PorU-mutant validation-Rv	CTGTGCCCAGTAATTTTGTG
00029-cloning-Fw	GTGGATCCCCCGGGCTGCACCCCTTGTCCATGTTAGACG
00029-cloning-Rv	CTGGAAGATAGGCAATTAGTGAAGTGACAGGGGATGCTA
00029-mutant validation-Fw	AAACAAATAAATGAAGAAAATTTTATCTTTGCT
00029-mutant validation-Rv	CTGGAAGATAGGCAATTAGTGAAGTGACAGGGGATGCTA
00890-cloning-Fw	GTGGATCCCCCGGGCTGCAACACTGATGTCGTTGCCTTT
00890-cloning-Rv	CTGGAAGATAGGCAATTAGGCAACCTTACCACAGGGAAA
00890-mutant validation-Fw	AAACAAATAAATGAAGAAAATTTTATCTTTGCT
00890-mutant validation-Rv	CTGGAAGATAGGCAATTAGGCAACCTTACCACAGGGAAA
00822-cloning-Fw	GTGGATCCCCCGGGCTGCACAAGTAGAGTTCCGGTTCGG
00822-cloning-Rv	CTGGAAGATAGGCAATTAGAAATCACGACCCTCGATGTG
00822-mutant validation-Fw	AAACAAATAAATGAAGAAAATTTTATCTTTGCT
00822-mutant validation-Rv	CTGGAAGATAGGCAATTAGAAATCACGACCCTCGATGTG
00342-cloning-Fw	GTGGATCCCCCGGGCTGCAAGTTCGTTCTTCTCGATGGC
00342-cloning-Rv	CTGGAAGATAGGCAATTAGCAACCGCGGGTATAACAAGA
00342-mutant validation-Fw	AAACAAATAAATGAAGAAAATTTTATCTTTGCT
00342-mutant validation-Rv	CTGGAAGATAGGCAATTAGCAACCGCGGGTATAACAAGA
03191-cloning-Fw	GTGGATCCCCCGGGCTGCATGGGGCGTTTGTATTTGTCA
03191-cloning-Rv	CTGGAAGATAGGCAATTAGAAACCGCTGACGGTCTATTC
03191-mutant validation-Fw	AAACAAATAAATGAAGAAAATTTTATCTTTGCT
03191-mutant validation-Rv	CTGGAAGATAGGCAATTAGAAACCGCTGACGGTCTATTC
00502-cloning-Fw	GTGGATCCCCCGGGCTGCATCCAGTCGTCAGACTTTCCT
00502-cloning-Rv	CTGGAAGATAGGCAATTAGGAAGGGACTAAAATCGCCGT
00502-mutant validation-Fw	AAACAAATAAATGAAGAAAATTTTATCTTTGCT
00502-mutant validation-Rv	CTGGAAGATAGGCAATTAGGAAGGGACTAAAATCGCCGT
02199-cloning-Fw	GTGGATCCCCCGGGCTGCAGGGTCGCTTACATTTTGCAC
02199-cloning-Rv	CTGGAAGATAGGCAATTAGTCGGTGATTATGCTTTCGCA
02199-mutant validation-Fw	AAACAAATAAATGAAGAAAATTTTATCTTTGCT
02199-mutant validation-Rv	CTGGAAGATAGGCAATTAGTCGGTGATTATGCTTTCGCA
00472-cloning-Fw	GTGGATCCCCCGGGCTGCACTTGCTTCAAATCACGCTGG
00472-cloning-Rv	CTGGAAGATAGGCAATTAGGTTGCGTAATGTGAACGGTG
00472-mutant validation-Fw	AAACAAATAAATGAAGAAAATTTTATCTTTGCT
00472-mutant validation-Rv	CTGGAAGATAGGCAATTAGGTTGCGTAATGTGAACGGTG
01041-cloning-Fw	GTGGATCCCCCGGGCTGCATGTCGAAAGGCATCATCTGG
01041-cloning-Rv	CTGGAAGATAGGCAATTAGACCATTACGGCCATTACCAC
01041-mutant validation-Fw	AAACAAATAAATGAAGAAAATTTTATCTTTGCT
01041-mutant validation-Rv	CTGGAAGATAGGCAATTAGACCATTACGGCCATTACCAC
00823-cloning-Fw	GTGGATCCCCCGGGCTGCAGTGCCAGTTTCAACCAATCG
00823-cloning-Rv	CTGGAAGATAGGCAATTAGCTTGTACCCCAGCAGATGTC
00823-mutant validation-Fw	AAACAAATAAATGAAGAAAATTTTATCTTTGCT
00823-mutant validation-Rv	CTGGAAGATAGGCAATTAGGTAAGCTGGCGCTTGAAATC
00729-cloning-Fw	GTGGATCCCCCGGGCTGCATTGTTTTGGTTGTAACTGCC
00729-cloning-Rv	CTGGAAGATAGGCAATTAGGTCAATACGAACTGCAACTG
00729-mutant validation-Fw	AAACAAATAAATGAAGAAAATTTTATCTTTGCT
00729-mutant validation-Rv	CTGGAAGATAGGCAATTAGGTCAATACGAACTGCAACTG
00935-cloning-Fw	GTGGATCCCCCGGGCTGCAGACCAATTAAGCACGTCAAG
00935-cloning-Rv	CTGGAAGATAGGCAATTAGTGGTACAATTCGCTCAAAGA
00935-mutant validation-Fw	AAACAAATAAATGAAGAAAATTTTATCTTTGCT
00935-mutant validation-Rv	CTGGAAGATAGGCAATTAGTGGTACAATTCGCTCAAAGA
01686-cloning-Fw	GTGGATCCCCCGGGCTGCATACTCCCGTGTTTTTAGTGG
01686-cloning-Rv	CTGGAAGATAGGCAATTAGGGATGCCAGTTACCTGATAG
01686-mutant validation-Fw	AAACAAATAAATGAAGAAAATTTTATCTTTGCT
01686-mutant validation-Rv	CTGGAAGATAGGCAATTAGGGATGCCAGTTACCTGATAG
03166-cloning-Fw	GTGGATCCCCCGGGCTGCATCAAACCACACACAGAGAAA
03166-cloning-Rv	CTGGAAGATAGGCAATTAGGAATTCGGCCAAACCTTATG
03166-mutant validation-Fw	AAACAAATAAATGAAGAAAATTTTATCTTTGCT
03166-mutant validation-Rv	CTGGAAGATAGGCAATTAGGAATTCGGCCAAACCTTATG
00509-cloning-Fw	GTGGATCCCCCGGGCTGCAAGACAATCGAGGCATCATAC
00509-cloning-Rv	CTGGAAGATAGGCAATTAGATAGCGTGAATGGAAAACCT
00509-mutant validation-Fw	AAACAAATAAATGAAGAAAATTTTATCTTTGCT
00509-mutant validation-Rv	CTGGAAGATAGGCAATTAGATAGCGTGAATGGAAAACCT
00002-cloning-Fw	GTGGATCCCCCGGGCTGCAATCTATCTCAACCTCCTGCT
00002-cloning-Rv	CTGGAAGATAGGCAATTAGGAAGGAATCAGCGTAGATGT
00002-mutant validation-Fw	AAACAAATAAATGAAGAAAATTTTATCTTTGCT
00002-mutant validation-Rv	CTGGAAGATAGGCAATTAGGAAGGAATCAGCGTAGATGT
00104-cloning-Fw	GTGGATCCCCCGGGCTGCATGTGCCGATAACCTGAATGG
00104-cloning-Rv	CTGGAAGATAGGCAATTAGCAGAGAAAAGGGCTGGTGTT
00104-mutant validation-Fw	AAACAAATAAATGAAGAAAATTTTATCTTTGCT
00104-mutant validation-Rv	CTGGAAGATAGGCAATTAGCAGAGAAAAGGGCTGGTGTT
WecA-cloning-Fw	TCCCGACCGAGGTCTTTGTCCCCTTCTCCG
WecA-cloning-Rv	TCTTACACCGGCGGGTTGCTTTTTATGCCT
WecA-mutant validation-Fw	GCCTGATGCATGGAAAAACC
WecA-mutant validation-Rv	CTGGAAGATAGGCAATTAG
00503-cloning-Fw	GTGGATCCCCCGGGCTGCACGGATAACGGAATTACCCAT
00503-cloning-Rv	CTGGAAGATAGGCAATTAGTCTGACAAAGGTTGGTTGAA
00503-mutant validation-Fw	AAACAAATAAATGAAGAAAATTTTATCTTTGCT
00503-mutant validation-Rv	CTGGAAGATAGGCAATTAGTCTGACAAAGGTTGGTTGAA
00504-cloning-Fw	GTGGATCCCCCGGGCTGCATGTATAACCCCCAGAAGGAA
00504-cloning-Rv	CTGGAAGATAGGCAATTAGAACAATACCGTCAACCTCTC
00504-mutant validation-Fw	AAACAAATAAATGAAGAAAATTTTATCTTTGCT
00504-mutant validation-Rv	CTGGAAGATAGGCAATTAGAACAATACCGTCAACCTCTC
00505-cloning-Fw	GTGGATCCCCCGGGCTGCATTTATTAGCCGTGGTATCGG
00505-cloning-Rv	CTGGAAGATAGGCAATTAGACTCCAACAGCATCTTCAAT
00505-mutant validation-Fw	AAACAAATAAATGAAGAAAATTTTATCTTTGCT
00505-mutant validation-Rv	CTGGAAGATAGGCAATTAGACTCCAACAGCATCTTCAAT
00506-cloning-Fw	GTGGATCCCCCGGGCTGCAGTAGTGTATCGCTTTGTCCT
00506-cloning-Rv	CTGGAAGATAGGCAATTAGATTCATTACTGGTCGGAACC
00506-mutant validation-Fw	AAACAAATAAATGAAGAAAATTTTATCTTTGCT
00506-mutant validation-Rv	CTGGAAGATAGGCAATTAGATTCATTACTGGTCGGAACC
00507-cloning-Fw	GTGGATCCCCCGGGCTGCAGGGATACTGAATGTCTGTCC
00507-cloning-Rv	CTGGAAGATAGGCAATTAGACAGTGTAATCATCAACGCT
00507-mutant validation-Fw	AAACAAATAAATGAAGAAAATTTTATCTTTGCT
00507-mutant validation-Rv	CTGGAAGATAGGCAATTAGACAGTGTAATCATCAACGCT
00508-cloning-Fw	GTGGATCCCCCGGGCTGCAATTTTCAATCCAGTCCCTCC
00508-cloning-Rv	CTGGAAGATAGGCAATTAGTACAGTTTGCCGATACCAAA
00508-mutant validation-Fw	AAACAAATAAATGAAGAAAATTTTATCTTTGCT
00508-mutant validation-Rv	CTGGAAGATAGGCAATTAGTACAGTTTGCCGATACCAAA
Primer name (for knockouts)	Sequence (5' - 3')
03048-03053 KO-upstream cloning-Fw	GTGGATCCCCCGGGCTGCATATGAACTACAAAGTCATCG
03048-03053 KO-upstream cloning-Rv	TTCAAGAAGCACCACCGTTATGATATA
03048-03053 KO-downstream cloning-Fw	TAACGGTGGTGCTTCTTGAAAATTAAG
03048-03053 KO-downstream cloning-Rv	CTGGAAGATAGGCAATTAGGACGATTTCGTGGACA
03048-03053 KO-validation-Fw1	GTGGATCCCCCGGGCTGCATATGAACTACAAAGTCATCG
03048-03053 KO-validation-Rv2	CTGGAAGATAGGCAATTAGGACGATTTCGTGGACA
03048-03053 KO-validation-Fw3	TCAACGCACCATTACTTTC
03048-03053 KO-validation-Rv4	ATGAAAAACAGTTTACTTGC
00502 KO-upstream cloning-Fw	GTGGATCCCCCGGGCTGCATACAATCCGTTGGAACTGTC
00502 KO-upstream cloning-Rv	ATTAGTATTTCAGCATTCATTTGCTGGTGA
00502 KO-downstream cloning-Fw	ATGAATGCTGAAATACTAATTTTAGATAGACTATAATTTG
00502 KO-downstream cloning-Rv	CTGGAAGATAGGCAATTAGGAACTGGTCGTAAAAATCAC
00502 KO-validation-Fw1	GTGGATCCCCCGGGCTGCATACAATCCGTTGGAACTGTC
00502 KO-validation-Rv2	CTGGAAGATAGGCAATTAGGAACTGGTCGTAAAAATCAC
00502 KO-validation-Fw3	GTGGATCCCCCGGGCTGCATCCAGTCGTCAGACTTTCCT
00502 KO-validation-Rv4	CTGGAAGATAGGCAATTAGGAAGGGACTAAAATCGCCGT
00509 KO-upstream cloning-Fw	GTGGATCCCCCGGGCTGCAATCCTTCCACTTTTCCTCTC
00509 KO-upstream cloning-Rv	AATTGATCGTTCTAAAGCCGACGATTTAAG
00509 KO-downstream cloning-Fw	CGGCTTTAGAACGATCAATTTTAAAATGAATATAT
00509 KO-downstream cloning-Rv	CTGGAAGATAGGCAATTAGTTCAACGAAAACAGAACATC
00509 KO-validation-Fw1	GTGGATCCCCCGGGCTGCAATCCTTCCACTTTTCCTCTC
00509 KO-validation-Rv2	CTGGAAGATAGGCAATTAGTTCAACGAAAACAGAACATC
00509 KO-validation-Fw3	GTGGATCCCCCGGGCTGCAAGACAATCGAGGCATCATAC
00509 KO-validation-Rv4	CTGGAAGATAGGCAATTAGATAGCGTGAATGGAAAACCT
Primer name (for recombinants)	Sequence (5' - 3')
pET-28b-backbone (for r00502)-Fw	ATTCGTAAAACACCACCACCACCACCACTG
pET-28b-backbone (for r00502)-Rv	TCACGCCGTCCATGGTATATCTCCTTCTTA
r00502-cloning-Fw	ATATACCATGGACGGCGTGAGCCAACCTAC
r00502-cloning-Rv	GGTGGTGGTGTTTTACGAATACTTTCTTCA
pET-28b-backbone (for r00509)-Fw	GATGGTAAAACACCACCACCACCACCACTG
pET-28b-backbone (for r00509)-Rv	CTTCACCAACCATGGTATATCTCCTTCTTA
r00509-cloning-Fw	ATATACCATGGTTGGTGAAGATTTACATTT
r00509-cloning-Rv	GGTGGTGGTGTTTTACCATCATCTTCTTAC
Primer name (for faecal bacterial DNA qPCR quantification)	Sequence (5' - 3')
P. clara (both WT and 00502KO)-Fw	CGTAGGAGTTTGGACCGTGT
P. clara (both WT and 00502KO)-Rv	GCATGGGAGCGACAAATAAA
P. clara (specific to WT)-Fw	TCACTTCAATGTCGCGGTCA
P. clara (specific to WT)-Rv	TGGAGATGCCTCAATCGCTC
P. clara (specific to 00502 KO)-Fw	GAGGGTGTGGCATTCACTAATA
P. clara (specific to 00502 KO)-Rv	GCGCGTCCTTAGTACAAGTT
P. merdae-Fw	TGGGTTTAAAGGGTGCGTAG
P. merdae-Rv	GCTTTCGTGCTTCAGTGTCA
B. uniformis-Fw	GCATAGTTCTTCCGCATGGT
B. uniformis-Rv	CAACCCATAGGGCAGTCATC
P. rodentium-Fw	ACGACGCCATATCTTCCGAC
P. rodentium-Rv	TACCGTCTGTGTTGAAGCCC
P. muris-Fw	CGTGAGGTTGAAGGTTCGGA
P. muris-Rv	AAACCGTCATTTGCCACAGC
Total bacteria (universal primer)-Fw	GGTGAATACGTTCCCGG
Total bacteria (universal primer)-Rv	TACGGCTACCTTGTTACGACTT
